# Supplementary material for: Dietary Supplementation of Ferrous Glycine Chelate Improves Growth Performance of Piglets by Enhancing Serum Immune Antioxidant Properties, Modulating Microbial Structure and Its Metabolic Function in the Early Stage
Source: Front Vet Sci. 2022 Apr 25;9:876965. doi: 10.3389/fvets.2022.876965 (PMC9083199; doi:10.3389/fvets.2022.876965)
Supplement: Supplementary file 5 [file Data_Sheet_2.xlsx]

## Sheet: FGC-Serum
7D	GH（ng/ml）	NEFA(umol/L)	GLU（mmol/L）	TC（mmol/L）	TG（mmol/L）	HDL（mmol/L）	LDL（mmol/L）	ALT（U/L）	AST（U/L）	TP（g/l）	ALB（g/l）	ALP（U/L）	BUN（mmol/L）	GSH-Px（umol/l）	SOD（U/ml）	T-AOC（U/ml）	MDA（nmol/ml）	CAT（U/ML）	IgA（ug/ml）	IL-6（ng/L）	TNF-a （ng/L）	IL-10（ng/L）	IgG（mg/mL）	IgM（ug/ml）	IL-8（ng/L）	DLA(umol/L)	GC(ng/ml)	ACTH(pg/ml)	EPI(ng/ml)	IFN-伽马（pg/mL）	XOD（U/L）	SF(ng/ml)	Hepcidin（ng/ml）	LDH（U/L）	UA（umol/l）	TIBC（mg/L）
Ctrl	1.178	181.811	5.69	2.8	0.61	1.26	1.83	36.36	64.46	45.16	27.84	292.1	2.23	12.489	59.239	11.717	1.622	2.987	13.726	31.757	45.806	15.511	6.44	6.731	56.519	6.014	2.386	8.692	2.061	106.636	0.373	10.902	15.159	215.8	20.4	203.929
	0.895	145.413	5.28	2.69	0.57	1.34	1.96	33.58	62.95	39.15	26.82	323.96	2.49	12.876	50.778	10.356	1.515	3.581	12.501	29.42	41.289	15.311	5.416	5.885	50.866	6.166	2.377	8.442	1.932	87.947	0.373	10.508	14.615	321.185	15.42	160.109
	1.154	150.727	5.22	3.42	0.81	1.44	2.2	31.36	33.54	38.1	26.87	387.55	2.67	13.502	58.916	10.126	1.632	2.691	12.795	29.639	42.916	17.114	5.719	5.684	52.543	6.318	1.615	8.47	1.743	87.384	0.448	10.705	14.073	323.325	18.26	165.781
	0.681	151.694	4.81	2.68	0.69	0.83	1.1	34.07	39.76	36.06	25.34	319.37	2.35	11.127	53.235	11.791	1.752	3.181	12.456	25.869	42.29	14.434	5.416	5.355	49.192	5.983	2.027	8.081	1.719	82.321	0.353	11.165	15.555	411.88	17.21	189.76
	0.942	148.793	5.02	2.14	0.36	0.89	1.42	24.34	46.28	44.22	27.6	202.79	2.88	12.175	55.553	7.795	1.705	2.987	12.028	24.5	41.164	14.593	6.023	5.739	48.736	5.694	2.279	8.692	1.908	112.052	0.429	13.282	14.517	483.71	28.67	198.077
	1.237	149.277	5.47	2.73	0.64	1.25	1.8	37.64	64.49	47.41	28.6	288.87	2.3	12.26	57.89	11.98	1.65	2.9	11.803	26.23	43.167	14.077	5.703	5.355	52.696	5.557	2.099	8.276	2.036	100.102	0.39	10.639	15.258	423.93	20.42	203.96
	1.049	145.895	5.31	2.6	0.58	1.28	1.94	34	63.11	38.32	27.16	315.2	2.52	12.48	60.61	10.58	1.58	3.52	11.96	25.076	43.292	14.077	5.56	5.665	54.07	5.816	2.288	8.831	2.578	96.985	0.389	11.198	15.308	422.77	15.195	159.028
	1.213	138.661	5.24	3.41	0.83	1.42	2.27	31.91	34.82	37.41	23.13	378.53	2.65	13.78	59.83	10.02	1.64	3.58	11.668	24.931	42.039	14.275	5.655	5.574	52.391	5.983	2.494	8.553	2.721	100.102	0.437	10.607	13.826	347.09	18.38	166.24
	0.823	157.987	4.92	2.63	0.7	0.79	1.14	35.44	39.42	34.72	23.32	322.74	2.92	11.03	54.18	11.66	1.69	3.25	13.044	23.135	44.045	13.799	6.007	5.757	55.141	6.014	2.575	8.998	1.938	109.77	0.377	11.659	16.348	411.3	17.465	188.02
	1.06	123.28	4.99	2.21	0.35	0.9	1.4	25.21	45.54	42.38	21.5	194.23	2.27	11.92	53.28	8.11	1.73	3.03	11.444	23.494	55.333	13.719	5.623	5.519	52.848	5.406	2.234	8.943	1.908	103.224	0.414	13.748	15.506	489.445	28.835	201.9
FGC	1.546	150.727	4.58	1.95	0.5	0.85	1.28	33.59	48.96	46.65	27.21	391.92	2.77	10.62	56.351	11.754	1.315	3.472	12.118	25.796	43.669	15.151	5.735	5.775	56.212	6.09	2.521	8.887	1.987	107.206	0.332	14.3176	15.209	416.09	19.09	135.158
	1.496	155.081	5.49	1.67	0.5	0.87	1.22	53.22	56.76	45.91	25.57	389.92	2.36	12.349	59.22	9.83	1.587	4.033	13.589	32.417	45.68	15.151	6.617	6.786	57.592	6.196	2.431	8.498	2.067	108.345	0.352	14.6102	14.961	418.8	19.475	96.058
	1.686	135.772	6.19	2.18	0.54	1.01	1.35	37.62	32.16	44.76	26.37	334.32	2.26	10.847	59.454	10.903	1.481	3.434	12.524	29.057	41.289	15.711	5.305	5.922	50.409	6.196	2.323	8.192	1.92	89.638	0.344	13.662	14.517	348.13	18.425	165.624
	1.337	150.243	5.04	2.16	0.61	1.05	1.03	31.64	10.03	41	26.71	469.94	2.14	14.533	61.652	10.298	1.398	3.484	12.569	30.587	41.914	17.517	5.623	5.647	52.543	6.151	1.499	8.192	1.689	88.229	0.363	12.7886	13.974	446.035	8.895	166.457
	1.032	186.205	4.61	2.65	0.96	1.24	0.89	51.05	54.35	43.42	26.7	420.55	2.68	10.725	63.362	9.139	1.351	3.956	12.501	25.652	42.791	14.275	5.528	5.574	50.257	5.709	2.063	7.86	1.689	86.539	0.346	12.7886	13.456	447.945	10.85	146.243
	1.624	149.76	4.62	1.86	0.49	0.82	1.32	34.74	47.98	47.98	25.88	379.05	2.87	10.78	58.13	11.87	1.54	4.69	12.591	24.931	40.914	14.514	6.231	5.684	45.245	5.907	2.467	8.803	1.951	101.804	0.323	14.0261	14.566	216.56	19.11	135.086
	1.573	188.16	5.47	1.75	0.52	0.83	1.21	53.37	58.11	48.07	23.09	376.84	2.46	12.67	56.83	9.5	1.44	3.95	12.433	23.566	41.914	14.673	6.52	5.977	45.094	4.709	2.099	8.109	1.865	106.636	0.358	13.9161	14.467	326.19	19.14	96.248
	1.771	153.145	6.06	2.18	0.53	0.99	1.41	38.8	32.14	43.37	23.78	330.21	2.22	11.07	61.43	10.74	1.51	3.27	12.84	23.135	42.039	14.315	6.103	5.665	48.432	5.466	2.207	8.47	2.522	103.792	0.35	13.3705	14.714	328.72	18.68	166.162
	1.405	160.41	5.04	2.14	0.6	1.07	1.08	31.26	9.75	39.6	21.72	470	2.16	14.66	61.21	10.12	1.46	3.43	12.388	23.494	42.039	13.997	6.135	5.574	54.376	5.466	2.297	8.915	2.795	104.361	0.343	12.2452	13.678	442.19	8.89	164.512
	1.084	150.727	4.63	2.57	0.93	1.22	0.91	50.77	55.07	44.2	27	437.75	2.71	10.51	62.11	8.9	1.37	3.75	15.676	30.295	55.59	17.517	7.765	7.045	70.406	6.349	2.826	8.165	2.245	139.089	0.354	12.3904	14.912	448.54	10.83	148.206
14D	GH（ng/ml）	NEFA(umol/L)	GLU（mmol/L）	TC（mmol/L）	TG（mmol/L）	HDL（mmol/L）	LDL（mmol/L）	ALT（U/L）	AST（U/L）	TP（g/l）	ALB（g/l）	ALP（U/L）	BUN（mmol/L）	GSH-Px（umol/l）	SOD（U/ml）	T-AOC（U/ml）	MDA（nmol/ml）	CAT（U/ML）	IgA（ug/ml）	IL-6（ng/L）	TNF-a （ng/L）	IL-10（ng/L）	IgG（mg/mL）	IgM（ug/ml）	IL-8（ng/L）	DLA(umol/L)	GC(ng/ml)	ACTH(pg/ml)	EPI(ng/ml)	IFN-伽马（pg/mL）	XOD（U/L）	SF(ng/ml)	Hepcidin（ng/ml）	LDH（U/L）	UA（umol/l）	TIBC（mg/L）
Ctrl	2.06	163.32	1.82	2.66	0.6	1.04	1.67	44.37	73.08	49.61	28.1	298.35	3.82	12.472	51.069	9.262	1.55	4.85	11.781	27.387	41.789	14.474	5.448	5.482	54.835	5.892	1.454	8.054	1.792	98.684	0.356	10.968	14.319	570.03	20.19	231.366
	1.582	161.865	2.03	2.8	0.92	1.15	1.7	24.66	63.76	43.02	22.04	207.37	4.15	11.179	39.746	9.793	1.36	4.58	11.848	26.302	41.664	14.793	5.352	5.373	54.376	5.846	2.054	8.248	1.743	96.985	0.349	10.902	16.1	485.44	18.48	170.096
	0.957	162.35	4.16	2.72	0.54	1	1.79	42.92	68.5	42.72	25.27	309.06	2.15	11.389	43.812	10.693	1.32	3.49	11.736	25.508	40.914	12.453	5.337	5.629	53.001	5.998	2.35	8.581	1.945	101.804	0.389	12.585	15.753	473.37	22.32	188.311
	1.71	162.835	4.27	2.69	0.61	1.07	1.72	38.59	66.41	43.87	23.99	259.14	2.79	11.785	54.888	10.783	1.64	4.78	11.826	25.292	44.674	13.957	5.655	5.812	56.825	5.922	2.27	8.054	1.841	108.915	0.369	11.751	16.001	559.67	12.24	164.195
	1.751	157.502	4.32	2.75	0.83	1	1.76	33.06	56.47	46.58	21.18	236.23	3.71	12.087	44.021	10.989	1.42	5.66	11.512	24.787	41.289	14.872	5.512	5.574	54.835	4.392	1.947	8.359	1.89	99.818	0.363	12.453	14.27	541.06	20.67	227.534
	2.164	153.145	2.01	2.6	0.62	1.03	1.59	46.34	71.86	48.78	29.03	300.79	2.95	12.38	52.89	9.38	1.564	4.711	12.095	23.996	41.164	14.196	6.039	5.391	53.612	5.345	2.377	8.525	2.77	105.498	0.349	11.33	14.714	701.24	20.31	232.658
	1.664	184.74	2.05	2.69	0.9	1.15	1.67	23.75	63.6	41.64	23.09	214.32	4.31	11.16	40.25	10.06	1.383	4.4	15.491	29.639	53.926	17.557	7.57	7.155	69.94	6.379	2.79	8.248	2.251	146.931	0.335	10.804	16.795	743.95	18.445	172.114
	1.22	138.18	4.12	2.62	0.51	0.98	1.77	41.42	70.71	41.34	26.09	300.02	3.19	11.11	43.17	10.91	1.395	3.626	11.624	22.849	38.296	14.554	5.448	5.665	49.04	5.36	2.359	8.998	1.823	110.911	0.395	11.718	15.951	758.98	22.18	185.124
	1.797	168.662	4.23	2.67	0.61	1.05	1.77	39.84	64.8	45.87	23.28	263	2.84	11.88	52.9	11.23	1.57	4.903	12.05	25.652	46.437	14.952	6.552	6.473	62.666	5.983	2.817	9.556	2.104	128.399	0.381	12.618	15.951	497.055	12.29	163.066
	1.839	159.925	4.36	2.85	0.79	0.97	1.7	33.88	53.78	48.69	21.79	234.4	3.71	12.63	43.32	10.71	1.372	6.459	11.444	26.446	40.414	13.6	4.971	5.904	53.306	6.196	2.072	8.692	1.908	91.049	0.401	11.585	14.863	562.785	20.31	231.882
FGC	2.683	159.925	3.63	2.53	0.69	1.11	1.65	56.05	95.91	40.93	25.23	340.93	3.9	12.95	46.68	8.46	1.367	6.369	11.983	27.17	40.914	14.673	5.512	6.087	57.592	5.846	2.198	7.776	1.938	102.94	0.353	13.4794	14.813	487.195	15.1	141.888
	2.385	153.629	5.12	2.4	0.48	1.04	1.72	91.34	93.35	43.7	25.21	333.63	2.32	10.2	51.25	10.53	1.405	4.155	12.231	27.749	42.54	14.872	5.4	5.647	54.529	5.709	1.508	8.498	1.719	105.214	0.367	13.5157	15.555	466.71	13.015	174.726
	2.319	161.38	4.58	1.68	0.48	0.44	1.17	37.32	88.17	44.8	19.02	252.97	3.98	10.46	46.02	9.68	1.232	6.762	11.556	26.23	42.29	14.156	5.464	5.647	54.988	5.74	2.144	8.192	1.798	99.535	0.303	12.1374	15.456	553.43	18.99	114.491
	1.849	161.865	3.68	2.28	0.55	1.01	1.49	32.69	73.07	42.08	22.9	321.67	2.52	10.89	52.65	9.96	1.274	4.22	11.4	24.644	43.543	12.019	5.305	5.702	54.07	5.755	2.368	8.664	1.987	105.214	0.37	12.1726	15.555	540.8	16.13	182.542
	1.935	160.41	1.92	2.01	0.76	0.74	1.28	40.26	67.31	48.84	23.05	287.24	2.79	11.62	50.41	9.87	1.216	4.027	11.579	25.508	46.311	13.838	5.751	5.995	56.212	5.74	2.261	8.609	1.951	103.792	0.377	12.6082	15.753	621.48	11.795	181.558
	2.82	167.205	3.61	2.42	0.7	1.06	1.61	55.17	92.39	42.26	24.68	330.1	4.08	13.624	47.688	8.547	1.39	6.35	11.736	24.787	43.92	13.402	5.879	5.94	54.223	5.557	2.323	8.998	2.399	106.636	0.341	13.189	14.665	702.01	15.15	140.517
	2.506	163.806	5.07	2.42	0.46	0.99	1.75	93.06	97.71	42.47	24.21	320.74	2.34	10.393	48.96	10.187	1.68	4.12	11.489	22.705	39.541	13.561	6.023	5.592	46.003	5.694	2.189	8.553	2.516	99.535	0.358	12.9338	15.209	757.32	12.84	175.536
	2.436	164.776	4.52	1.65	0.47	0.44	1.14	38.71	87.48	42.69	18.62	253.53	3.81	10.865	48.294	9.867	1.2	6.93	12.276	24.212	44.799	14.037	6.392	5.885	56.059	5.512	2.341	9.137	1.859	112.338	0.3	12.7886	15.11	754.15	19.06	115.108
	1.943	161.38	3.66	2.18	0.54	1.01	1.56	31.58	73.81	40.82	22.45	320.6	2.4	10.9	50.575	9.546	1.26	4.34	12.185	24.14	43.167	15.511	6.247	5.794	58.205	5.709	2.503	9.137	1.756	122.072	0.377	11.7755	15.209	491.18	16.07	180.132
	2.033	168.176	2.01	2.08	0.72	0.72	1.25	39.27	65.16	46.4	23.71	276.83	2.91	12.122	49.891	9.558	1.26	4.12	12.501	27.025	46.689	15.191	6.713	6.584	63.592	5.861	2.727	9.667	1.963	136.194	0.294	11.9559	15.258	629.66	12.03	182.798
28D	GH（ng/ml）	NEFA(umol/L)	GLU（mmol/L）	TC（mmol/L）	TG（mmol/L）	HDL（mmol/L）	LDL（mmol/L）	ALT（U/L）	AST（U/L）	TP（g/l）	ALB（g/l）	ALP（U/L）	BUN（mmol/L）	GSH-Px（umol/l）	SOD（U/ml）	T-AOC（U/ml）	MDA（nmol/ml）	CAT（U/ML）	IgA（ug/ml）	IL-6（ng/L）	TNF-a （ng/L）	IL-10（ng/L）	IgG（mg/mL）	IgM（ug/ml）	IL-8（ng/L）	DLA(umol/L)	GC(ng/ml)	ACTH(pg/ml)	EPI(ng/ml)	IFN-伽马（pg/mL）	XOD（U/L）	SF(ng/ml)	Hepcidin（ng/ml）	LDH（U/L）	UA（umol/l）	TIBC（mg/L）血清总铁结合力
Ctrl	1.687	155.081	3.82	2.21	0.73	0.78	1.35	22.44	37.99	43.52	20.8	168.34	2.22	11.127	41.4	8.954	1.73	5.994	11.893	26.808	42.039	14.753	5.959	5.867	53.612	5.542	2.081	8.498	1.823	106.636	0.366	11.429	15.555	458.51	18.62	134.02
	1.133	167.205	3.35	2.53	0.93	0.79	1.54	47.9	74.26	47.34	20.72	180.93	4.29	10.707	50	9.706	1.95	5.349	11.668	24.572	43.794	14.593	5.975	5.611	56.212	5.679	2.144	6.644	1.963	110.34	0.353	11.429	15.753	511.92	15.17	157.9
	1.338	159.44	3.89	1.99	0.62	0.83	1.23	34.2	46.98	47.41	17.48	316.85	2.1	12.245	31.75	9.312	2.15	4.788	12.028	24.716	43.292	15.151	6.183	5.757	55.294	5.057	2.189	8.47	1.957	102.372	0.366	11.396	16.646	456.66	19.61	166.151
	1.15	153.629	3.88	1.91	0.8	0.71	1.21	38.66	99.96	55.11	19.91	232.37	2.43	15.755	40.32	10.656	1.86	6.64	11.826	23.637	44.925	14.275	5.927	5.665	52.085	5.633	2.332	8.331	2.454	104.645	0.338	10.869	16.243	750.26	15.95	176.645
	1.673	160.895	3.61	2.25	1.04	0.92	1.33	26.88	45.3	59.23	26.37	186.91	3.4	11.266	39.81	9.879	2.11	6.653	11.534	23.566	45.932	14.952	5.991	5.702	51.78	5.512	2.306	8.331	2.485	124.945	0.384	11.626	14.418	451.54	14.9	188.224
	1.773	163.32	3.85	2.25	0.71	0.8	1.34	22.1	38.12	43.74	21.68	169.32	2.15	11.32	43.033	9.28	1.814	5.88	12.028	24.716	48.965	15.351	6.44	5.812	56.212	5.907	2.467	8.803	1.859	123.221	0.343	11.593	16.199	462.34	20.16	153.828
	1.19	161.38	3.47	2.61	0.93	0.83	1.49	49.38	74.35	46.25	21.46	184.51	4.46	10.9	48.124	10.01	2.006	4.28	12.637	26.663	44.925	15.151	6.842	6.878	66.064	6.029	2.817	9.723	1.987	130.705	0.347	10.935	16.497	508.185	14.925	145.613
	1.405	182.787	3.82	1.93	0.63	0.83	1.24	33.97	45.5	45.07	17.62	308.33	2.01	12.78	32.431	8.85	2.048	4.65	12.908	29.785	46.311	16.271	6.135	6.087	58.205	6.41	2.189	8.637	1.841	105.783	0.36	11.099	16.398	448.595	18.35	165.048
	1.208	159.925	3.93	2	0.83	0.73	1.22	37.88	96.28	54.99	19.08	240.51	2.49	15.28	38.682	10.23	1.913	6.61	12.343	27.967	43.292	15.311	5.623	5.099	56.519	6.242	1.866	7.721	1.756	100.669	0.336	11.034	16.143	760.275	15.94	182.339
	1.756	146.861	3.65	2.26	1.08	0.88	1.35	26.23	44.1	57.07	27.06	181.58	3.28	10.85	39.366	9.59	2.032	6.7	11.444	26.808	44.171	15.072	5.368	5.391	55.141	5.998	1.597	7.555	1.695	92.178	0.407	11.33	15.852	454.34	14.975	188.484
FGC	2.556	161.38	4.25	2.44	0.41	1.14	1.64	39.98	42.05	50.17	29.68	227.32	3.34	12.45	43.394	10.76	1.859	8.42	12.028	26.519	43.92	14.793	6.199	5.665	56.825	6.09	1.911	7.196	1.841	100.385	0.38	12.983	15.665	523.205	19.39	143.822
	2.003	159.925	5.14	2.03	0.49	0.86	1.28	50.74	64.14	51.98	18.74	332.87	2.05	11.1	46.016	10.27	1.726	6.06	11.534	27.17	43.669	15.551	5.831	5.812	54.223	5.664	1.992	8.22	1.914	112.338	0.418	12.95	15.011	613.075	15.605	123.631
	2.028	162.35	3.95	2.78	0.8	1.24	1.85	41.34	28.61	41.02	20.19	300.98	2.65	13.95	39.822	7.77	1.616	6.27	11.736	25.003	43.92	14.992	6.183	5.922	57.899	5.968	2.099	6.809	1.932	113.766	0.34	12.056	14.467	442.38	15.035	126.245
	2.295	154.597	4.48	2.07	0.48	0.87	1.34	32.13	39.06	44.6	16.76	195.11	2.01	11.63	49.226	10.24	1.455	6.77	11.916	25.076	44.422	15.471	6.135	5.519	56.978	4.89	2.297	8.387	1.914	104.077	0.369	12.353	15.728	525.915	17.3	119.255
	2.319	146.378	4.72	1.58	1.8	0.62	0.93	48.74	44.3	45.08	21.35	225.06	1.79	12.63	37.979	9.65	1.585	4.83	11.803	23.637	41.539	13.957	6.183	5.775	53.306	5.922	2.207	8.22	2.473	103.508	0.316	11.33	15.11	415.955	15.715	114.924
	2.686	154.113	4.22	2.39	0.42	1.13	1.63	38.41	40.99	48.11	29.1	216.15	3.28	12.699	42.87	11.051	1.73	7.666	12.411	26.446	44.045	14.395	6.263	6.289	60.664	5.421	2.467	8.943	1.871	138.8	0.367	12.486	16.813	515.11	18.42	153.746
	2.105	160.41	5.18	2.12	0.47	0.82	1.33	53.05	65.12	50.07	18.58	333.1	1.97	11.668	44.07	9.953	1.75	6.052	12.818	24.787	44.925	14.832	6.087	6.363	60.972	5.542	2.521	9.36	1.786	131.282	0.412	13.282	16.665	619.7	11.53	126.026
	2.132	165.748	3.94	2.78	0.81	1.19	1.77	41.15	28.86	40.72	19.69	298.7	2.68	14.306	38.15	7.511	1.63	6.549	11.736	27.387	42.54	16.151	7.052	6.989	70.872	5.74	2.584	9.556	1.938	147.222	0.344	11.99	15.875	444.52	15.3	125.741
	2.411	164.776	4.46	2.09	0.48	0.9	1.3	31.45	40.42	45.31	16.19	204.67	2.01	11.424	51.27	9.793	1.56	6.685	12.095	26.085	42.164	13.799	5.528	5.629	54.529	5.603	2.117	8.553	2.012	97.268	0.386	12.056	14.665	532.58	17.19	120.028
	2.436	156.049	4.79	1.58	1.84	0.6	0.96	48.6	43.2	45.88	20.9	228.07	1.88	12.873	37.53	10.015	1.63	5.704	11.803	25.58	40.047	14.593	5.352	5.611	55.753	6.044	2.35	8.692	1.896	98.684	0.327	10.869	15.06	420.77	15.74	116.876

## Sheet: FGC-Serum SAS
	7D	Ctrl	FGC	SEM	P				14D	Ctrl	FGC	SEM	P				28D	Ctrl	FGC	SEM	P
	NEFA(umol/L)	149.35	158.02	5.1	0.26				NEFA(umol/L)	161.25	162.26	2.92	0.81				NEFA(umol/L)	161.05	158.57	2.02	0.41
	GLU（mmol/L）	5.19	5.17	0.15	0.92				GLU（mmol/L）	3.34	3.78	0.44	0.49				GLU（mmol/L）	3.73	4.51	0.14	0.01
	TC（mmol/L）	2.73	2.11	0.14	0.01				TC（mmol/L）	2.71	2.17	0.07	0.01				TC（mmol/L）	2.19	2.18	0.13	0.97
	TG（mmol/L）	0.61	0.62	0.07	0.97				TG（mmol/L）	0.69	0.59	0.04	0.1				TG（mmol/L）	0.83	0.8	0.11	0.85
	HDL（mmol/L）	1.14	0.99	0.08	0.26				HDL（mmol/L）	1.04	0.86	0.05	0.02				HDL（mmol/L）	0.94	0.81	0.06	0.16
	LDL（mmol/L）	1.71	1.17	0.06	0.01				LDL（mmol/L）	1.71	1.46	0.06	0.02				LDL（mmol/L）	1.33	1.4	0.08	0.54
	ALT（U/L）	32.39	41.61	2.79	0.04				ALT（U/L）	36.88	51.54	6.47	0.14				ALT（U/L）	33.96	42.56	2.38	0.03
	AST（U/L）	49.44	40.53	3.08	0.07				AST（U/L）	65.29	83.44	2.02	0.01				AST（U/L）	60.28	43.68	5.22	0.05
	TP（g/l）	40.29	44.5	0.74	0.01				TP（g/l）	45.21	43.5	0.87	0.2				TP（g/l）	49.97	46.29	1.75	0.17
	ALB（g/l）	25.82	25.4	0.58	0.62				ALB（g/l）	24.39	22.91	0.82	0.23				ALB（g/l）	21.22	21.12	1.15	0.95
	ALP（U/L）	302.53	400.05	22.04	0.01				ALP（U/L）	262.27	303.82	12.83	0.04				ALP（U/L）	216.97	256.2	15.29	0.1
	BUN（mmol/L）	2.53	2.46	0.1	0.66				BUN（mmol/L）	3.36	3.11	0.27	0.52				BUN（mmol/L）	2.88	2.37	0.31	0.26
	DLA(umol/L)	5.9	5.83	0.12	0.7				DLA(umol/L)	5.73	5.71	0.12	0.92				DLA(umol/L)	5.8	5.69	0.13	0.55
	UA（umol/l）	20.02	15.34	1.83	0.1				UA（umol/l）	18.74	15.02	0.98	0.02				UA（umol/l）	16.86	16.12	0.5	0.32
	LDH（U/L）	385.05	383.92	24.49	0.97				LDH（U/L）	589.36	600.39	11.53	0.52				LDH（U/L）	526.26	505.32	26.88	0.59
	T-AOC（U/ml）	10.42	10.31	0.23	0.74				T-AOC（U/ml）	10.38	9.62	0.15	0.01				T-AOC（U/ml）	9.65	9.7	0.25	0.88
	GSH-Px（umol/l）	12.37	11.88	0.51	0.52				GSH-Px（umol/l）	11.81	11.4	0.16	0.11				GSH-Px（umol/l）	12.23	12.47	0.51	0.74
	SOD（U/ml）	56.35	59.97	1.12	0.04				SOD（U/ml）	46.61	49.24	1.31	0.19				SOD（U/ml）	40.49	43.03	1.32	0.21
	CAT（U/ML）	3.17	3.75	0.12	0.01				CAT（U/ML）	4.75	5.14	0.43	0.54				CAT（U/ML）	5.75	6.5	0.31	0.12
	MDA（nmol/ml）	1.65	1.45	0.03	0.01				MDA（nmol/ml）	1.46	1.33	0.04	0.06				MDA（nmol/ml）	1.96	1.66	0.04	0.01
	XOD（U/L）	0.4	0.34	0.01	0.01				XOD（U/L）	0.37	0.34	0.01	0.15				XOD（U/L）	0.36	0.37	0.01	0.72
	IgA（ug/ml）	12.34	12.92	0.34	0.26				IgA（ug/ml）	12.14	11.9	0.31	0.59				IgA（ug/ml）	12.03	11.99	0.1	0.78
	IgG（mg/mL）	5.76	6.16	0.19	0.18				IgG（mg/mL）	5.79	5.87	0.19	0.78				IgG（mg/mL）	6.04	6.08	0.09	0.79
	IgM（ug/ml）	5.73	5.97	0.15	0.28				IgM（ug/ml）	5.85	5.89	0.16	0.85				IgM（ug/ml）	5.78	5.96	0.09	0.22
	IL-6（ng/L）	26.41	26.9	0.82	0.68				IL-6（ng/L）	25.79	25.42	0.55	0.65				IL-6（ng/L）	25.93	25.77	0.38	0.78
	IL-8（ng/L）	52.5	53.06	1.7	0.82				IL-8（ng/L）	56.25	55.55	2.06	0.82				IL-8（ng/L）	56.11	58.2	1.09	0.21
	IL-10（ng/L）	14.69	15.28	0.36	0.27				IL-10（ng/L）	14.54	14.13	0.38	0.46				IL-10（ng/L）	15.09	14.85	0.19	0.4
	TNF-a （ng/L）	44.13	43.78	0.47	0.61				TNF-a （ng/L）	43.06	43.37	1.37	0.87				TNF-a （ng/L）	44.77	43.12	0.54	0.06
	IFN-伽马（pg/mL）	98.65	103.57	3.57	0.36				IFN-伽马（pg/mL）	108.9	109.35	4.97	0.95				IFN-伽马（pg/mL）	110.15	114.73	3.68	0.4
	GC(ng/ml)	2.24	2.27	0.09	0.79				GC(ng/ml)	2.25	2.26	0.1	0.96				GC(ng/ml)	2.2	2.26	0.07	0.6
	ACTH(pg/ml)	8.6	8.41	0.1	0.23				ACTH(pg/ml)	8.53	8.72	0.1	0.21				ACTH(pg/ml)	8.27	8.39	0.23	0.72
	EPI(ng/ml)	2.08	2.06	0.09	0.88				EPI(ng/ml)	2.01	1.99	0.05	0.82				EPI(ng/ml)	1.98	1.96	0.05	0.72
	GH（ng/ml）	1.02	1.46	0.05	0.01				GH（ng/ml）	1.67	2.29	0.1	0.01				GH（ng/ml）	1.43	2.3	0.04	0.01
	SF(ng/ml)	11.44	13.41	0.41	0.01				SF(ng/ml)	11.67	12.66	0.28	0.03				SF(ng/ml)	11.28	12.24	0.19	0.01
	Hepcidin（ng/ml）	15.02	14.45	0.24	0.12				Hepcidin（ng/ml）	15.47	15.26	0.19	0.45				Hepcidin（ng/ml）	15.97	15.51	0.209	0.14
	TIBC（mg/L）血清总铁结合力	183.68	141.98	6.14	0.01				TIBC（mg/L）血清总铁结合力	196.63	158.93	9.95	0.03				TIBC（mg/L）血清总铁结合力	165.82	127.03	6.42	0.01

## Sheet: VFA
	14d	mg/kg	Acetic acid	propionic acid	Butyric acid	isobutyric acid	isovaleric acid	Valeric acid			28d	mg/kg	Acetic acid	propionic acid	Butyric acid	isobutyric acid	isovaleric acid	Valeric acid
		1-1	4605.02	2831.18	1387.76	270.748	237.267	391.792				1-1	4254.02	2754.67	1122.38	283.98	191.346	399.529
		1-2	4055.12	2233.3	1377.79	276.321	241.954	558.01				1-2	4399.51	2536.25	1300.27	218.113	201.62	482.567
		1-3	3476.47	1648.5	1590.83	255.259	242.92	627.847				1-3	3704.89	2842.56	1425.36	173.54	243.727	323.678
		1-4	4364.94	2095.44	2022.12	331.28	323.735	853.676				1-4	4668.16	1617.32	1170.75	212.921	257.722	345.402
		1-5	4130.6	2200.33	1591.63	290.16	261.74	618.87				1-5	4001.76	2400.31	1300.51	223.33	213.5	310.787
		6-1	5390.95	4165.25	2272.55	350.712	363.229	681.31				6-1	3934.81	1902.12	1719.83	221.588	245.591	525.562
		6-2	5100.19	4144.6	2201.19	352.31	339.963	619.839				6-2	4369.77	2347.81	2009.98	273.775	298.547	596.673
		6-3	4608.83	3728.6	2198.66	339.726	351.106	645.588				6-3	4934.34	2376.45	1672.4	296.515	231.409	655.085
		6-4	4006.68	2156.91	1248.86	276.574	220.741	501.769				6-4	3474.76	1859.71	1988.74	175.201	215.717	670.852
		6-5	4700.68	3500.62	1800.76	340.62	328.76	590.96				6-5	4311.2	2200.42	1799.02	240.11	249.13	774.64
	14d	SAS	Ctrl	FGC	SEM	p					28d	SAS	Ctrl	FGC	SEM	p
		Acetic acid	4126.4	4761.5	189.02	0.08						Acetic acid	4205.7	4205	279.92	0.97
		propionic acid	2201.8b	3539.2a	250.52	0.02						propionic acid	2430.2	2137.3	127.41	0.18
		Butyric acid	1594	1944.4	215.53	0.31						Butyric acid	1263.85b	1837.99a	69.12	0.01
		isobutyric acid	284.75	331.99	18.5	0.15						isobutyric acid	222.38	241.44	23.45	0.6
		isovaleric acid	261.52	320.76	29.47	0.23						isovaleric acid	221.58	248.08	17.33	0.34
		Valeric acid	610	607.9	72.9	0.98						Valeric acid	372.39b	644.56a	47.28	0.02
		Total	9079	11506	747.78	0.08						Total	8716.1	9314.3	243.93	0.16

## Sheet: Nutrient digestibility
	前期	DM	OM	CP	GE	NDF	ADF	EE		后期	DM	OM	CP	GE	NDF	ADF	EE
	Q1-1	79.0994	83.1239	70.3399	78.4581	51.8852	46.35	61.104		Q1-1	80.938	84.4142	70.044	80.1787	53.0389	49.4269	62.8868
	Q1-2	81.9087	85.678	74.0067	81.1021	43.0531	48.2871	66.9774		Q1-2	83.0639	86.5632	77.1244	82.3165	52.0612	51.393	64.7462
	Q1-3	82.2976	86.1048	75.5681	81.5356	49.9601	49.3595	61.6194		Q1-3	81.7204	85.1	73.2873	80.5382	56.6484	53.6503	60.7406
	Q1-4	80.546	83.8008	73.6737	79.595	42.0339	37.6363	58.3804		Q1-4	84.3922	87.0723	75.5494	83.8164	56.3632	56.1023	70.6144
	Q1-5	82.5379	85.4738	74.5661	81.8211	56.5852	52.5697	62.3224		Q1-5	86.332	89.2502	82.3248	86.3583	54.8079	52.323	78.6219
	Q6-1	80.7796	84.6477	72.7277	79.7216	51.4736	52.1475	64.4995		Q6-1	80.7139	84.3551	71.6122	79.8154	49.5358	52.1402	63.2154
	Q6-2	81.8023	85.4667	73.4933	80.9241	52.0666	53.0023	66.491		Q6-2	83.9477	87.0896	78.9434	83.9931	63.6212	59.4852	75.0627
	Q6-3	79.9648	83.2404	70.3716	78.9256	54.8391	49.8398	66.1034		Q6-3	82.3004	85.8265	74.5676	82.1058	52.7821	54.2064	70.5862
	Q6-4	81.7979	84.9892	75.0709	80.388	59.4165	55.8773	63.0342		Q6-4	81.8864	85.3892	73.7638	81.0915	63.3539	64.7231	64.8353
	Q6-5	80.5753	84.3103	74.2306	80.1391	49.293	47.5228	67.062		Q6-5	82.7692	86.2182	74.2642	82.5613	59.8835	59.5309	69.708
	14d	SAS	Ctrl	FGC	SEM	p				28d	SAS	Ctrl	FGC	SEM	p
		DM	81.28	80.98	0.58	0.73					DM	83.29	82.32	0.62	0.33
		OM	84.83	84.53	0.57	0.73					OM	86.48	85.78	0.51	0.39
		CP	73.63	73.18	0.92	0.75					CP	75.66	74.63	1.32	0.61
		EE	62.08b	65.44a	0.7	0.03					EE	67.52	68.68	2.78	0.78
		GE	80.5	80.02	0.52	0.55					GE	82.64	81.91	0.78	0.55
		NDF	48.7	53.42	2.96	0.32					NDF	54.58	57.83	2.14	0.34
		ADF	46.84	51.68	2.73	0.28					ADF	52.58b	58.02a	1.14	0.03

## Sheet: α-Diversity Index
	D14	Ctrl					FGC
	Sample\Estimators	Ctr_14d_1	Ctr_14d_2	Ctr_14d_3	Ctr_14d_4	Ctr_14d_5	FGC_14d_1	FGC_14d_2	FGC_14d_3	FGC_14d_4	FGC_14d_5	Mean-Ctrl	Mean-FGC	SEM	P-value
	sobs	484	409	498	359	366	308	295	407	301	386	423	339	37.5	0.108229
	shannon	3.89487	3.41345	4.21353	2.71782	2.99937	2.8322	2.33289	3.0908	2.50488	2.94473	3.45	2.74	0.31	0.100915
	simpson	0.056839	0.085958	0.038619	0.172934	0.122793	0.154883	0.281739	0.174441	0.212118	0.180865	0.0954	0.201	0.0327	0.024386
	ace	568.584	480.788	575.408	448.96	438.865	378.313	375.579	466.398	354.516	470.869	503	409	38.2	0.079095
	chao	579.02	506.9	597.064	467.902	457.737	379	388.844	473.978	341.688	481.136	522	413	39.6	0.049665
	pd	40.3291	35.1832	42.2329	31.4168	33.4043	27.7829	28.3918	34.2097	28.0641	33.8273	36.5	30.5	2.52	0.084286
	D28	Ctrl					FGC
	Sample\Estimators	Ctr_28d_1	Ctr_28d_2	Ctr_28d_3	Ctr_28d_4	Ctr_28d_5	FGC_28d_1	FGC_28d_2	FGC_28d_3	FGC_28d_4	FGC_28d_5	Mean-Ctrl	Mean-FGC	SEM	P-value
	sobs	374	503	410	446	427	365	495	394	406	431	432	418	30.6	0.664056
	shannon	3.00719	4.10736	3.16246	3.45168	3.40876	2.79893	3.82066	3.36267	3.31675	2.80339	3.43	3.22	0.269	0.464305
	simpson	0.173629	0.047996	0.111356	0.097123	0.099436	0.150852	0.06526	0.089021	0.092427	0.207472	0.106	0.121	0.0327	0.656704
	ace	441.98	591.12	489.361	530.092	514.129	458.277	569.459	482.293	492.769	529.465	513	506	31.3	0.831408
	chao	445.366	622.022	482.226	530.058	531.65	456	576.9	501.763	495.204	536.02	522	513	36	0.807088
	pd	32.2889	40.5715	35.2734	35.642	37.7168	31.1661	40.5137	32.5147	34.8155	37.3682	36.3	35.3	2.17	0.650283

## Sheet: PCOA matrix
	D14	Ctrl_14d_1	Ctrl_14d_2	Ctrl_14d_3	Ctrl_14d_4	Ctrl_14d_5	FGC_14d_1	FGC_14d_2	FGC_14d_3	FGC_14d_4	FGC_14d_5
	Ctrl_14d_1	0	0.180107	0.340486	0.479467	0.222548	0.637011	0.640636	0.637386	0.642461	0.639536
	Ctrl_14d_2	0.180107	0	0.676107	0.588016	0.521448	0.627587	0.626437	0.64991	0.628412	0.643261
	Ctrl_14d_3	0.340486	0.676107	0	0.676032	0.581217	0.841766	0.839866	0.705129	0.841916	0.712629
	Ctrl_14d_4	0.479467	0.588016	0.676032	0	0.410084	0.615473	0.638306	0.810444	0.45308	0.813194
	Ctrl_14d_5	0.222548	0.521448	0.581217	0.410084	0	0.665058	0.641611	0.673833	0.656309	0.671683
	FGC_14d_1	0.637011	0.627587	0.841766	0.615473	0.665058	0	0.465373	0.869013	0.354085	0.876712
	FGC_14d_2	0.640636	0.626437	0.839866	0.638306	0.641611	0.465373	0	0.866838	0.158734	0.874863
	FGC_14d_3	0.637386	0.64991	0.705129	0.810444	0.673833	0.869013	0.866838	0	0.567738	0.117013
	FGC_14d_4	0.642461	0.628412	0.841916	0.45308	0.656309	0.354085	0.158734	0.567738	0	0.879762
	FGC_14d_5	0.639536	0.643261	0.712629	0.813194	0.671683	0.876712	0.874863	0.117013	0.879762	0
	D28	Ctrl_28d_1	Ctrl_28d_2	Ctrl_28d_3	Ctrl_28d_4	Ctrl_28d_5	FGC_28d_1	FGC_28d_2	FGC_28d_3	FGC_28d_4	FGC_28d_5
	Ctrl_28d_1	0	0.524337	0.470047	0.642371	0.514991	0.579346	0.892448	0.788038	0.78466	0.836446
	Ctrl_28d_2	0.524337	0	0.492126	0.412973	0.438038	0.79219	0.554131	0.528873	0.545719	0.546321
	Ctrl_28d_3	0.470047	0.492126	0	0.376011	0.477453	0.421472	0.538253	0.65454	0.648365	0.825775
	Ctrl_28d_4	0.642371	0.412973	0.376011	0	0.735886	0.306347	0.446923	0.509961	0.4946	0.681476
	Ctrl_28d_5	0.514991	0.438038	0.477453	0.735886	0	0.636725	0.442147	0.366566	0.364372	0.678787
	FGC_28d_1	0.579346	0.79219	0.421472	0.306347	0.636725	0	0.566717	0.660628	0.636725	0.80441
	FGC_28d_2	0.892448	0.554131	0.538253	0.446923	0.442147	0.566717	0	0.361295	0.348257	0.553378
	FGC_28d_3	0.788038	0.528873	0.65454	0.509961	0.366566	0.660628	0.361295	0	0.547547	0.461467
	FGC_28d_4	0.78466	0.545719	0.648365	0.4946	0.364372	0.636725	0.348257	0.547547	0	0.47244
	FGC_28d_5	0.836446	0.546321	0.825775	0.681476	0.678787	0.80441	0.553378	0.461467	0.47244	0

## Sheet: COGFunctional Predictive Analys
D14								D28
Name	Mean-Ctrl	Mean-FGC	SEM	P-Value				Name	Mean-Ctrl	Mean-FGC	SEM	P-Value
COG0001	7839	7056	1885	0.688746				COG0001	6310	3527	822	0.009559
COG0002	10390	12020	1427	0.28636				COG0002	10370	9272	1997	0.597376
COG0003	475	445	102	0.776543				COG0003	630	437	104	0.100985
COG0004	12150	11410	978	0.471				COG0004	12020	10620	1622	0.413289
COG0005	7733	6948	1576	0.631893				COG0005	7926	8526	1774	0.743858
COG0006	24700	25260	2216	0.80688				COG0006	27430	25350	1100	0.095393
COG0007	9756	10230	1069	0.669361				COG0007	9091	8471	1393	0.668069
COG0008	26700	29650	2508	0.273318				COG0008	28200	27210	3740	0.79792
COG0009	15580	16130	2179	0.80706				COG0009	15840	13810	1160	0.118181
COG0010	9442	11730	1302	0.11691				COG0010	9606	8978	1985	0.759849
COG0011	314	215	84.7	0.276379				COG0011	764	632	203	0.535948
COG0012	15320	14830	1883	0.801273				COG0012	15600	13490	1230	0.124702
COG0013	20940	21410	3749	0.903319				COG0013	19980	15250	2194	0.063151
COG0014	12430	12410	1400	0.988948				COG0014	12150	10580	1759	0.398206
COG0015	14690	14910	1707	0.900624				COG0015	15450	13580	1067	0.117814
COG0016	14680	14800	1668	0.944423				COG0016	15400	13400	1117	0.111223
COG0017	22320	23970	2693	0.557137				COG0017	22160	19580	2551	0.34147
COG0018	14690	14820	1663	0.939596				COG0018	15420	13510	1128	0.128716
COG0019	26750	31550	4805	0.347087				COG0019	25860	20640	4306	0.259991
COG0020	15840	17100	1126	0.295787				COG0020	16930	17180	1644	0.882932
COG0021	2082	1977	562	0.856458				COG0021	2119	1701	437	0.366738
COG0022	4213	3031	1562	0.470806				COG0022	4415	6204	1231	0.184285
COG0023	256	1427	366	0.012678				COG0023	428	371	202	0.785898
COG0024	19280	22280	4156	0.490967				COG0024	20120	15880	2104	0.078604
COG0025	5843	3640	1473	0.173209				COG0025	6643	5852	1883	0.685465
COG0026	3671	585	708	0.002425				COG0026	2839	2669	949	0.862271
COG0027	258	1372	418	0.028555				COG0027	417	321	216	0.666825
COG0028	28380	30690	4314	0.606927				COG0028	29100	25010	2481	0.13791
COG0029	8935	9675	2434	0.768903				COG0029	8417	5226	1589	0.079453
COG0030	17940	20290	3574	0.52928				COG0030	18310	14540	2104	0.11093
COG0031	20790	19420	1335	0.33478				COG0031	20210	19430	2276	0.740682
COG0033	20	88.2	39	0.118481				COG0033	65.2	185	177	0.517574
COG0034	16630	19710	3558	0.411944				COG0034	16340	12220	2576	0.148404
COG0035	14660	14720	1712	0.972907				COG0035	15370	13340	1114	0.105923
COG0036	16990	17790	2436	0.751002				COG0036	18300	15190	1561	0.081508
COG0037	25220	26470	2609	0.644646				COG0037	26650	22960	3166	0.277355
COG0038	22890	22410	4480	0.917315				COG0038	22170	17720	1899	0.047166
COG0039	24570	21180	4174	0.440152				COG0039	25360	22340	3124	0.36203
COG0040	10470	12350	1431	0.22536				COG0040	10550	9366	2089	0.586325
COG0041	12780	12730	1433	0.973014				COG0041	12470	10770	1806	0.374046
COG0042	22900	24310	2884	0.637975				COG0042	22670	20490	2431	0.395945
COG0043	800	1737	406	0.049887				COG0043	1019	908	214	0.61612
COG0044	26390	30280	4673	0.429354				COG0044	25350	19930	4145	0.22733
COG0045	253	263	56.1	0.868313				COG0045	338	423	176	0.642835
COG0046	12780	12730	1433	0.973014				COG0046	12470	10770	1806	0.374142
COG0047	3003	1167	331	0.00054				COG0047	2741	2296	415	0.314428
COG0048	14640	14750	1669	0.949058				COG0048	15230	13300	1033	0.098534
COG0049	14670	14800	1669	0.93981				COG0049	15400	13400	1117	0.1112
COG0050	15080	15010	1672	0.967625				COG0050	16020	13950	1036	0.080778
COG0051	14530	14700	1645	0.92025				COG0051	15240	13210	1052	0.089736
COG0052	14680	14800	1668	0.944419				COG0052	15400	13400	1117	0.111234
COG0053	15780	15680	2150	0.964039				COG0053	15560	15740	3116	0.955358
COG0054	11740	13350	1618	0.348815				COG0054	12080	11540	855	0.545424
COG0055	20290	21180	3798	0.820599				COG0055	19400	15090	2393	0.109411
COG0056	17580	20200	3655	0.493874				COG0056	17880	14120	2132	0.115743
COG0057	14890	14950	1704	0.97277				COG0057	15690	13780	1071	0.1123
COG0058	20940	22640	3335	0.623972				COG0058	20350	17560	4160	0.521344
COG0059	10660	12030	1642	0.428261				COG0059	10480	9120	2140	0.542922
COG0060	14680	14820	1674	0.935417				COG0060	15410	13400	1115	0.109186
COG0061	14290	14780	1766	0.788504				COG0061	14920	13240	959	0.117961
COG0062	4295	3909	1502	0.803713				COG0062	5613	6807	1143	0.326698
COG0063	14220	14580	1752	0.8423				COG0063	14730	12810	1032	0.099996
COG0064	12900	10900	2520	0.450333				COG0064	12820	8732	1827	0.055662
COG0065	14370	17660	3326	0.351607				COG0065	13810	10310	2933	0.266856
COG0066	14320	17600	3323	0.352483				COG0066	13610	10180	2855	0.263909
COG0067	786	376	252	0.142096				COG0067	1156	526	263	0.043542
COG0068	2640	3182	1385	0.705817				COG0068	3105	5148	1506	0.212048
COG0069	10230	11120	1248	0.496079				COG0069	10280	9211	2000	0.607446
COG0070	797	378	256	0.140234				COG0070	1173	530	275	0.047602
COG0071	18890	23160	2612	0.140709				COG0071	19170	16870	3038	0.470759
COG0072	14680	14800	1669	0.944431				COG0072	15400	13400	1118	0.111435
COG0073	13940	12690	2094	0.566961				COG0073	12810	11490	801	0.138016
COG0074	670	950	177	0.153372				COG0074	1022	1132	562	0.849739
COG0075	5844	5474	1453	0.805431				COG0075	5666	7096	1454	0.35415
COG0076	1185	1925	517	0.190233				COG0076	1313	1015	402	0.479831
COG0077	11300	12440	1932	0.571504				COG0077	11120	9569	2232	0.506742
COG0078	20090	22800	2689	0.343099				COG0078	21950	20640	1609	0.439055
COG0079	29600	30730	4508	0.808387				COG0079	28370	22830	4747	0.276793
COG0080	14680	14800	1668	0.944423				COG0080	15400	13400	1117	0.111223
COG0081	14680	14800	1668	0.94441				COG0081	15400	13400	1117	0.111223
COG0082	11570	12520	1748	0.601644				COG0082	11320	9830	2191	0.515668
COG0083	4906	5566	920	0.493525				COG0083	5884	6671	1163	0.517548
COG0084	16290	16720	1854	0.822397				COG0084	17410	14510	1125	0.032741
COG0085	14820	14930	1676	0.949281				COG0085	15670	13540	1234	0.12257
COG0086	14640	14750	1669	0.949073				COG0086	15230	13300	1031	0.098224
COG0087	15320	14830	1883	0.801273				COG0087	15600	13490	1230	0.124702
COG0088	14680	14800	1668	0.94441				COG0088	15400	13400	1117	0.111223
COG0089	14680	14800	1668	0.944423				COG0089	15400	13400	1117	0.111223
COG0090	14680	14800	1668	0.944423				COG0090	15400	13400	1117	0.111223
COG0091	14680	14800	1668	0.944423				COG0091	15400	13400	1117	0.111211
COG0092	14680	14800	1669	0.944452				COG0092	15410	13410	1122	0.112413
COG0093	14670	14800	1669	0.939819				COG0093	15400	13400	1116	0.110939
COG0094	14380	14690	1612	0.852258				COG0094	15230	13210	1055	0.091776
COG0095	5212	1201	544	7.8e-05				COG0095	5457	5423	1479	0.982226
COG0096	14680	14800	1668	0.944423				COG0096	15400	13400	1117	0.111223
COG0097	14680	14800	1668	0.94441				COG0097	15400	13400	1117	0.111223
COG0098	14500	14650	1646	0.929627				COG0098	15070	13120	965	0.078022
COG0099	14680	14800	1668	0.944423				COG0099	15400	13400	1117	0.111223
COG0100	14670	14800	1669	0.939819				COG0100	15400	13400	1116	0.110939
COG0101	18630	17000	2136	0.467312				COG0101	18650	15720	1741	0.130975
COG0102	14670	14800	1668	0.939806				COG0102	15400	13400	1116	0.110939
COG0103	14270	14650	1586	0.816715				COG0103	15080	13060	1067	0.09496
COG0104	14760	14870	1846	0.953957				COG0104	15200	13350	1097	0.130182
COG0105	3398	2024	484	0.021847				COG0105	3857	3779	1262	0.952242
COG0106	10770	12400	1493	0.306799				COG0106	10870	9541	2065	0.537904
COG0107	14110	18000	3116	0.247202				COG0107	14050	10550	2839	0.252711
COG0108	11160	12910	1793	0.35761				COG0108	10990	10240	747	0.344979
COG0109	211	213	56.5	0.972625				COG0109	276	408	174	0.469493
COG0110	26470	28380	1517	0.243599				COG0110	28580	28670	1246	0.944212
COG0111	23770	27330	2869	0.249862				COG0111	24360	23620	5134	0.888963
COG0112	14680	14760	1690	0.963397				COG0112	15080	13260	1108	0.139137
COG0113	7585	7060	1959	0.795467				COG0113	6186	3497	858	0.013951
COG0114	3262	2365	1172	0.465966				COG0114	3936	3749	1524	0.905342
COG0115	13890	16850	1931	0.163873				COG0115	14560	14670	3216	0.973556
COG0116	13710	13280	1368	0.761296				COG0116	14330	12900	1001	0.190964
COG0117	3339	3691	1452	0.814495				COG0117	4216	3885	1530	0.83415
COG0118	10720	12570	1428	0.231403				COG0118	11070	9585	2092	0.498038
COG0119	18340	18760	2303	0.859845				COG0119	18100	16950	3364	0.741286
COG0120	5759	4895	1894	0.660326				COG0120	5888	4756	2010	0.588768
COG0121	19.6	86.4	38.5	0.120884				COG0121	63.8	186	176	0.509158
COG0122	6588	9366	1087	0.033821				COG0122	7970	7665	1802	0.869804
COG0123	208	132	69.8	0.306854				COG0123	221	237	79.5	0.84931
COG0124	16110	15090	1598	0.541219				COG0124	16810	14680	917	0.048614
COG0125	9484	8052	719	0.081568				COG0125	12170	13080	1005	0.391717
COG0126	14680	14800	1668	0.944423				COG0126	15400	13400	1117	0.111211
COG0127	17150	16840	2324	0.8972				COG0127	17450	14950	1295	0.089569
COG0128	11580	12610	1768	0.576173				COG0128	11400	10020	2229	0.553075
COG0129	16810	21260	2788	0.14917				COG0129	17720	15530	3826	0.582752
COG0130	15310	14800	1877	0.792684				COG0130	15600	13480	1231	0.123296
COG0131	10780	12410	1495	0.307372				COG0131	10880	9558	2070	0.540984
COG0132	3694	7008	2329	0.192517				COG0132	3502	1726	1094	0.143138
COG0133	9405	11330	1293	0.174949				COG0133	9128	8610	1888	0.790708
COG0134	7862	8906	2251	0.655137				COG0134	7187	4425	1468	0.096739
COG0135	7064	8720	2509	0.527748				COG0135	6233	3502	1337	0.07542
COG0136	14050	14740	1808	0.712713				COG0136	13760	11600	1628	0.221201
COG0137	12480	12460	1380	0.988788				COG0137	12250	10660	1765	0.394007
COG0138	12870	12840	1433	0.983811				COG0138	12710	10950	1806	0.358325
COG0139	10580	12430	1548	0.266346				COG0139	10820	9560	2134	0.571177
COG0140	2906	3369	1525	0.769225				COG0140	4199	6050	1519	0.257797
COG0141	10790	12410	1497	0.310728				COG0141	10900	9576	2076	0.541492
COG0142	18450	18750	2719	0.914875				COG0142	19770	17470	1180	0.087156
COG0143	15180	14950	1739	0.898019				COG0143	16160	13830	1037	0.054832
COG0144	25350	24910	4563	0.925556				COG0144	25540	20230	2353	0.053971
COG0145	946	947	82.4	0.986858				COG0145	1506	991	292	0.11574
COG0146	197	126	71.2	0.343755				COG0146	204	218	80	0.865482
COG0147	9729	11550	1305	0.200485				COG0147	9642	8935	1872	0.71551
COG0148	23640	26810	5648	0.589998				COG0148	22520	16100	3269	0.085162
COG0149	17790	15900	1677	0.292334				COG0149	18630	16020	952	0.02539
COG0150	12650	12630	1412	0.989046				COG0150	12320	10600	1762	0.357676
COG0151	12820	12770	1444	0.973232				COG0151	12520	10810	1821	0.375237
COG0152	12810	12720	1406	0.950517				COG0152	12370	10710	1744	0.369069
COG0153	13870	14310	1619	0.792695				COG0153	14420	12640	1019	0.118794
COG0154	15120	11520	2530	0.192522				COG0154	14880	10690	1824	0.050726
COG0155	744	806	78.6	0.454111				COG0155	1181	771	228	0.10968
COG0156	1540	3798	976	0.049382				COG0156	2050	1585	503	0.382738
COG0157	7959	9276	2552	0.619783				COG0157	7239	4440	1491	0.097263
COG0158	190	130	66.4	0.395273				COG0158	236	340	182	0.58462
COG0159	7884	8927	2244	0.654529				COG0159	7213	4434	1465	0.094439
COG0160	1942	613	553	0.042952				COG0160	1933	1646	538	0.608374
COG0161	4201	7348	2353	0.217796				COG0161	3977	1870	1191	0.114783
COG0162	14700	14800	1663	0.953524				COG0162	15510	13440	1093	0.094962
COG0163	4043	7098	2317	0.223835				COG0163	3721	1724	1111	0.110105
COG0164	14500	14650	1646	0.929627				COG0164	15070	13120	965	0.078022
COG0165	12470	12450	1381	0.9888				COG0165	12230	10650	1755	0.394374
COG0166	14970	14810	1595	0.922582				COG0166	15510	13450	1067	0.089653
COG0167	16350	16180	2145	0.938774				COG0167	15540	12700	1489	0.092931
COG0168	26470	29430	4085	0.489353				COG0168	26340	20960	4677	0.283249
COG0169	23010	27370	4529	0.36386				COG0169	22390	19190	3988	0.445463
COG0170	289	102	268	0.503365				COG0170	168	185	133	0.901457
COG0171	14540	14710	1648	0.920357				COG0171	15250	13240	1049	0.091682
COG0172	14940	14820	1581	0.941377				COG0172	15530	13520	1082	0.100333
COG0173	14780	14920	1669	0.935226				COG0173	15820	13790	1193	0.127158
COG0174	14060	13300	1405	0.603176				COG0174	14690	12950	865	0.079077
COG0175	14250	17920	2808	0.227565				COG0175	14570	11390	2506	0.240208
COG0176	11680	12820	2007	0.585584				COG0176	12050	10450	2353	0.515677
COG0177	14410	14990	1837	0.760285				COG0177	15210	13190	1145	0.115615
COG0178	21240	21990	1156	0.534562				COG0178	24060	22870	902	0.223596
COG0179	2825	4772	1244	0.156201				COG0179	4006	5927	1553	0.251204
COG0180	14680	14800	1670	0.944468				COG0180	15410	13410	1121	0.112244
COG0181	8328	7695	2086	0.76929				COG0181	7022	4354	1021	0.03104
COG0182	2419	3084	1448	0.658172				COG0182	2797	4837	1313	0.158959
COG0183	12280	10300	2279	0.410341				COG0183	12980	16270	1789	0.103156
COG0184	14680	14800	1668	0.944423				COG0184	15400	13400	1117	0.111223
COG0185	14670	14800	1668	0.939801				COG0185	15400	13400	1117	0.111223
COG0186	14340	14650	1613	0.852387				COG0186	15070	13100	966	0.075821
COG0187	30460	29680	3808	0.842804				COG0187	31030	26950	2642	0.161088
COG0188	29000	29360	3321	0.916341				COG0188	30320	26570	2196	0.126061
COG0189	700	595	112	0.377132				COG0189	889	829	183	0.751139
COG0190	14870	14980	1662	0.948857				COG0190	15630	13620	1147	0.11793
COG0191	24210	24630	3980	0.918547				COG0191	26270	20320	3061	0.087828
COG0192	17480	18480	1173	0.418782				COG0192	19600	19040	1996	0.786145
COG0193	14680	14800	1668	0.944423				COG0193	15400	13400	1117	0.111223
COG0194	24220	24130	4547	0.984695				COG0194	24450	19840	2448	0.096422
COG0195	14680	14800	1668	0.944423				COG0195	15400	13400	1117	0.111223
COG0196	14850	15980	1978	0.583447				COG0196	15530	13410	1093	0.088492
COG0197	14680	14800	1668	0.944423				COG0197	15400	13400	1117	0.111223
COG0198	14670	14800	1669	0.939828				COG0198	15400	13400	1117	0.111031
COG0199	16980	16790	2267	0.935258				COG0199	17500	14800	1207	0.05575
COG0200	14640	14750	1669	0.949069				COG0200	15230	13300	1033	0.098534
COG0201	15370	14880	1879	0.800889				COG0201	15600	13520	1122	0.100969
COG0202	14440	14740	1614	0.857206				COG0202	15290	13230	1065	0.089162
COG0203	14620	14760	1665	0.935042				COG0203	15350	13380	1106	0.11273
COG0204	26640	28680	3555	0.581812				COG0204	26560	22570	2512	0.150902
COG0205	37530	42790	6473	0.439958				COG0205	37170	30020	6427	0.298202
COG0206	14430	14820	1573	0.810374				COG0206	15290	13290	1057	0.09503
COG0207	13160	13960	1764	0.662257				COG0207	13580	12280	1028	0.241573
COG0208	4953	3453	967	0.159592				COG0208	4836	3244	718	0.057515
COG0209	6585	6204	1243	0.766959				COG0209	7788	8566	1366	0.584562
COG0210	30920	29430	3335	0.666912				COG0210	30800	26500	3301	0.228983
COG0211	14640	14770	1662	0.939573				COG0211	15240	13400	1039	0.114519
COG0212	15270	14810	1896	0.814409				COG0212	15590	13470	1227	0.122281
COG0213	5019	3839	1559	0.470717				COG0213	5798	7135	1291	0.330768
COG0214	1435	1031	422	0.366135				COG0214	1920	1374	313	0.119654
COG0215	14680	14800	1669	0.944431				COG0215	15400	13400	1117	0.111081
COG0216	14870	14860	1708	0.995471				COG0216	15670	13630	1107	0.102622
COG0217	15070	15110	1659	0.98135				COG0217	15850	13840	1233	0.141777
COG0218	14400	14790	1778	0.831827				COG0218	15270	13370	1170	0.142899
COG0219	14480	13390	1745	0.549508				COG0219	14760	13070	1283	0.224127
COG0220	14490	14770	1616	0.866714				COG0220	15200	13310	1164	0.143202
COG0221	2234	1108	613	0.10357				COG0221	2699	2146	501	0.302018
COG0222	14740	14830	1642	0.957636				COG0222	15470	13450	1139	0.11418
COG0223	14690	14890	1702	0.909339				COG0223	15480	13590	1075	0.116676
COG0224	20290	21180	3798	0.820628				COG0224	19420	15100	2398	0.109277
COG0225	7506	7327	556	0.75578				COG0225	8950	10040	485	0.054671
COG0226	17520	17730	1498	0.891995				COG0226	18340	18310	1900	0.987788
COG0227	14170	14530	1607	0.828383				COG0227	14780	12950	1014	0.108887
COG0228	14560	14750	1641	0.910691				COG0228	15240	13260	1128	0.117404
COG0229	3679	2455	1032	0.269782				COG0229	4202	3916	1411	0.844398
COG0230	946	1440	439	0.293005				COG0230	931	502	209	0.074398
COG0231	16260	16900	2339	0.791274				COG0231	17930	15820	1289	0.140183
COG0232	12310	11600	2144	0.749003				COG0232	11630	9788	2302	0.446681
COG0233	14680	14800	1668	0.944423				COG0233	15400	13400	1117	0.111223
COG0234	14880	14670	1938	0.916392				COG0234	14920	13050	1028	0.106352
COG0235	21560	25890	5301	0.437647				COG0235	21540	15110	3998	0.146448
COG0236	31040	32080	4839	0.835197				COG0236	30270	24370	4116	0.189684
COG0237	14670	14800	1668	0.939806				COG0237	15390	13400	1116	0.112459
COG0238	14670	14800	1668	0.939801				COG0238	15400	13400	1117	0.111223
COG0239	11990	12190	4039	0.961723				COG0239	12030	8874	2949	0.315694
COG0240	14700	14840	1662	0.934957				COG0240	15460	13560	1130	0.131159
COG0241	274	299	89	0.789234				COG0241	464	588	360	0.739606
COG0242	27790	27440	3313	0.918456				COG0242	28780	25640	2008	0.156576
COG0243	10870	3967	2818	0.039945				COG0243	9987	6823	3348	0.372334
COG0244	14390	14690	1611	0.856941				COG0244	15240	13210	1054	0.090351
COG0245	10820	12380	1504	0.329955				COG0245	11050	9554	2079	0.492262
COG0246	11740	13080	1470	0.38859				COG0246	11740	10120	1939	0.427756
COG0247	5377	7320	2255	0.41399				COG0247	5015	3011	822	0.040604
COG0248	12250	9456	2325	0.263802				COG0248	12000	9273	1417	0.090452
COG0249	17360	19970	1143	0.051862				COG0249	19570	18970	2024	0.774496
COG0250	20070	22470	3790	0.544259				COG0250	20710	15560	2020	0.03421
COG0251	14710	17790	2033	0.168169				COG0251	15550	15530	3590	0.995691
COG0252	7146	7959	374	0.06147				COG0252	8464	9191	1025	0.498141
COG0253	16000	20120	3690	0.296583				COG0253	15810	11940	2641	0.180953
COG0254	14690	14890	1693	0.908855				COG0254	15460	13670	1075	0.134401
COG0255	14620	14710	1663	0.958175				COG0255	15290	13360	1109	0.120077
COG0256	14680	14800	1668	0.944423				COG0256	15400	13400	1117	0.111223
COG0257	2704	2272	683	0.544544				COG0257	3940	3812	1116	0.911493
COG0258	1950	1125	515	0.147921				COG0258	1859	1268	480	0.253493
COG0259	49.4	146	31.8	0.016323				COG0259	176	291	239	0.642691
COG0260	830	552	159	0.118278				COG0260	1170	1182	300	0.969114
COG0261	14680	14810	1661	0.939555				COG0261	15410	13490	1123	0.125756
COG0262	14690	14630	2026	0.977101				COG0262	14870	13290	1265	0.246893
COG0263	12930	12620	1375	0.827235				COG0263	12630	10830	1729	0.32836
COG0264	14680	14800	1669	0.944447				COG0264	15400	13400	1116	0.110876
COG0265	30960	35590	3683	0.244224				COG0265	31890	28510	4359	0.460447
COG0266	4433	2811	974	0.134385				COG0266	4932	4428	1314	0.711286
COG0267	16400	17000	2275	0.79862				COG0267	17860	15780	1260	0.137292
COG0268	14400	14730	1723	0.852894				COG0268	14070	11670	1610	0.174294
COG0269	1080	501	491	0.271975				COG0269	1162	798	326	0.296836
COG0270	19690	18340	6179	0.832532				COG0270	23280	28330	5245	0.363859
COG0271	189	127	65.8	0.373894				COG0271	233	339	182	0.575494
COG0272	15090	15380	1833	0.878243				COG0272	15960	13860	1188	0.115116
COG0274	8144	7497	1298	0.631583				COG0274	10310	10280	1539	0.984923
COG0275	21530	22100	3794	0.884299				COG0275	21200	16390	2508	0.0914
COG0276	1630	426	431	0.023487				COG0276	1551	1542	529	0.98685
COG0277	7594	6752	1080	0.458195				COG0277	9386	11220	888	0.072658
COG0278	189	127	65.9	0.375884				COG0278	233	339	182	0.575494
COG0279	613	603	109	0.928013				COG0279	1089	851	365	0.533507
COG0280	15190	16250	2147	0.634787				COG0280	15830	13630	1106	0.081786
COG0281	13530	15180	1470	0.294228				COG0281	15450	16560	2203	0.627917
COG0282	17940	17030	2490	0.724234				COG0282	18270	15500	1128	0.039549
COG0283	14680	14810	1662	0.939568				COG0283	15400	13490	1123	0.127451
COG0284	14040	14630	1787	0.749764				COG0284	13690	11330	1600	0.178504
COG0285	22540	21890	3908	0.872027				COG0285	21260	16430	2103	0.050766
COG0286	28650	28360	2935	0.923719				COG0286	30790	27400	2369	0.19024
COG0287	11530	12530	1756	0.584592				COG0287	11370	9820	2190	0.499151
COG0288	1223	373	449	0.095318				COG0288	941	704	292	0.439314
COG0289	14260	14990	1890	0.709447				COG0289	14050	11690	1701	0.202631
COG0290	14650	14770	1666	0.94434				COG0290	15270	13320	1044	0.09887
COG0291	14680	14800	1665	0.944319				COG0291	15510	13430	1093	0.093594
COG0292	14690	14800	1665	0.94894				COG0292	15510	13430	1094	0.093722
COG0293	274	90.2	246	0.476797				COG0293	187	213	201	0.900415
COG0294	9461	8714	2332	0.756971				COG0294	7973	4941	866	0.008076
COG0295	11780	12720	1632	0.580473				COG0295	13110	11670	1760	0.437023
COG0296	17930	19200	3647	0.73666				COG0296	16290	11860	3338	0.221104
COG0297	17630	19220	3418	0.654192				COG0297	15850	11840	3143	0.237811
COG0298	1053	719	197	0.128386				COG0298	1120	1009	304	0.724453
COG0299	12760	12700	1424	0.967433				COG0299	12450	10760	1806	0.376723
COG0300	15670	16050	2051	0.857606				COG0300	16000	14170	1267	0.1867
COG0301	14250	13460	1374	0.581072				COG0301	14870	13110	1095	0.146587
COG0302	9203	8648	2452	0.826598				COG0302	7837	4823	933	0.01203
COG0303	14650	16540	2831	0.523234				COG0303	14220	11090	2299	0.210419
COG0304	13270	13050	1448	0.88298				COG0304	13060	11620	1785	0.443171
COG0305	17520	18230	1219	0.576309				COG0305	19350	18860	1901	0.803108
COG0306	3162	4591	1168	0.25601				COG0306	5249	7104	1075	0.12268
COG0307	11570	13220	1601	0.332743				COG0307	11800	10920	884	0.348439
COG0308	4302	4354	2048	0.980369				COG0308	5133	4358	2120	0.724193
COG0309	9309	10250	1484	0.543602				COG0309	8511	7952	1891	0.775038
COG0310	7142	9269	1022	0.070879				COG0310	7652	7493	1236	0.900853
COG0311	1095	968	357	0.731694				COG0311	1576	1183	304	0.231612
COG0312	1420	1059	177	0.07632				COG0312	1969	1747	339	0.531339
COG0313	14830	16010	1992	0.569932				COG0313	15650	13490	1160	0.099682
COG0314	1469	379	545	0.080604				COG0314	1348	1458	500	0.831428
COG0315	6363	8952	1253	0.072744				COG0315	6791	6893	1659	0.952496
COG0316	250	472	123	0.10754				COG0316	566	1002	695	0.547502
COG0317	22120	23540	4097	0.737809				COG0317	21970	16810	2446	0.067958
COG0318	10180	8115	1199	0.123426				COG0318	10700	11130	1665	0.802716
COG0319	14670	14800	1669	0.93981				COG0319	15400	13400	1117	0.111268
COG0320	421	1467	381	0.025311				COG0320	563	534	217	0.896884
COG0321	401	1432	370	0.023785				COG0321	540	505	201	0.864095
COG0322	14850	14870	1723	0.991021				COG0322	15440	13530	1073	0.112962
COG0323	14050	14640	1697	0.737059				COG0323	14760	12980	1021	0.119403
COG0324	14590	14760	1640	0.920006				COG0324	15090	13120	968	0.076348
COG0325	15800	18060	3148	0.493212				COG0325	15160	11660	2533	0.204348
COG0326	11260	12680	1572	0.392667				COG0326	11580	9867	2146	0.447792
COG0327	14270	14690	1542	0.792255				COG0327	15010	12940	943	0.059508
COG0328	10220	8523	1117	0.167093				COG0328	10980	11600	785	0.452577
COG0329	35340	40820	5630	0.358905				COG0329	35210	28650	6060	0.310571
COG0330	24640	24050	2584	0.825103				COG0330	24600	21710	2481	0.277704
COG0331	13890	14580	1791	0.71008				COG0331	13470	11400	1600	0.231922
COG0332	9990	7688	1218	0.095449				COG0332	10040	10470	1494	0.780816
COG0333	14400	14580	1643	0.915453				COG0333	14990	13020	938	0.068953
COG0334	11760	13830	1958	0.321367				COG0334	11750	9949	2257	0.447858
COG0335	14680	14800	1668	0.944423				COG0335	15400	13400	1117	0.111223
COG0336	14680	14800	1668	0.944423				COG0336	15400	13400	1117	0.111223
COG0337	12020	12630	1764	0.738445				COG0337	11770	10110	2191	0.470425
COG0338	9641	10960	1231	0.315343				COG0338	10350	9062	2180	0.570915
COG0339	640	2663	804	0.036012				COG0339	882	586	287	0.331936
COG0340	15830	18000	3115	0.505825				COG0340	15380	11880	2564	0.209312
COG0341	4597	2715	611	0.015152				COG0341	4797	3563	661	0.099057
COG0342	10660	12540	1509	0.248156				COG0342	10780	9210	2037	0.46293
COG0343	12780	12720	1426	0.967466				COG0343	12470	10860	1821	0.402311
COG0344	18890	18070	2711	0.770025				COG0344	19700	16850	1756	0.143285
COG0345	14120	13020	1221	0.394123				COG0345	13700	11990	1500	0.28727
COG0346	26070	24320	3733	0.651715				COG0346	23260	20020	4206	0.463203
COG0347	7757	6607	1625	0.49911				COG0347	8591	9279	1593	0.677222
COG0348	18600	25370	4169	0.143044				COG0348	18000	15080	4113	0.497905
COG0349	867	1521	449	0.183372				COG0349	1085	816	311	0.412442
COG0350	12640	15670	2393	0.241153				COG0350	13390	10970	1648	0.180078
COG0351	15300	14430	1857	0.651847				COG0351	14930	13600	952	0.199788
COG0352	18080	20100	3610	0.591128				COG0352	16250	12720	2906	0.259097
COG0353	15320	14840	1877	0.80461				COG0353	15610	13580	1235	0.138936
COG0354	12.4	85	37.9	0.091652				COG0354	63	183	177	0.51526
COG0355	20270	21190	3806	0.815086				COG0355	19430	15080	2407	0.108302
COG0356	18220	20230	3828	0.61376				COG0356	18090	14210	2232	0.120322
COG0357	14680	14810	1661	0.939555				COG0357	15410	13490	1123	0.125756
COG0358	38930	45020	4131	0.178635				COG0358	42070	40100	6947	0.78393
COG0359	14680	14800	1668	0.944423				COG0359	15400	13400	1117	0.111223
COG0360	14680	14800	1669	0.944431				COG0360	15400	13400	1117	0.11117
COG0361	14580	14710	1665	0.939686				COG0361	15180	13280	1021	0.099857
COG0362	3666	2466	1102	0.307921				COG0362	4018	3660	1339	0.796026
COG0363	16080	16810	2336	0.762699				COG0363	17030	14040	1402	0.065583
COG0364	3836	2512	1124	0.272736				COG0364	4139	3874	1389	0.853482
COG0365	2216	1087	495	0.05188				COG0365	2145	1555	357	0.136697
COG0366	65620	66600	11827	0.935998				COG0366	65190	50100	7409	0.076049
COG0367	18000	16630	2108	0.533981				COG0367	17980	15050	1626	0.109171
COG0368	10640	10570	1137	0.9524				COG0368	9987	8939	1439	0.487237
COG0369	11	83.6	37.9	0.091885				COG0369	59.8	182	176	0.508212
COG0370	25130	26700	2889	0.601576				COG0370	26170	24560	4902	0.751015
COG0371	12400	11090	1715	0.466939				COG0371	11580	10510	1987	0.604952
COG0372	18220	19460	3557	0.736375				COG0372	16740	12330	3264	0.213592
COG0373	9521	9644	1051	0.909739				COG0373	8368	7876	1346	0.724111
COG0374	442	181	87	0.017141				COG0374	484	498	233	0.952148
COG0375	1264	1044	265	0.430073				COG0375	1863	1403	250	0.103505
COG0376	0.4	0	0.4	0.34658				COG0376	0	0.2	0.2	0.34658
COG0376	0.4	0	0.4	0.34658				COG0377	617	546	208	0.741231
COG0377	449	1484	379	0.025673				COG0378	8340	7856	1793	0.794066
COG0378	8882	10020	1375	0.431975				COG0379	6772	4026	1414	0.087992
COG0379	7740	9063	2547	0.617524				COG0380	21.8	9.8	9.26	0.231168
COG0380	10.4	21.4	4.81	0.051447				COG0381	13160	15910	1353	0.076491
COG0381	10700	10740	1904	0.983754				COG0382	1497	1088	264	0.159599
COG0382	1062	2137	422	0.034461				COG0383	6916	3660	1669	0.08687
COG0383	7757	7580	2229	0.938655				COG0384	2637	4884	1486	0.169021
COG0384	2169	2742	1437	0.700591				COG0385	5810	3164	1131	0.047477
COG0385	6805	8118	2380	0.596262				COG0386	3469	5224	1562	0.29368
COG0386	3134	3370	1483	0.877523				COG0387	4.2	2	1.56	0.196719
COG0387	17	3.6	7.6	0.115929				COG0388	20130	18390	3595	0.641319
COG0388	20110	23390	2523	0.229764				COG0389	31810	25970	3404	0.124605
COG0389	29870	33520	5091	0.493809				COG0390	1675	1088	774	0.470022
COG0390	1485	2187	920	0.467349				COG0391	7316	8979	674	0.038766
COG0391	6042	5427	810	0.469463				COG0392	14260	12790	1265	0.278881
COG0392	13120	14350	1753	0.502813				COG0393	6187	6423	1629	0.888415
COG0393	6213	8795	1216	0.066494				COG0394	25510	22580	2419	0.260311
COG0394	25270	26780	3131	0.642522				COG0395	128900	82420	25133	0.101573
COG0395	127500	142400	27847	0.607147				COG0396	8653	10360	1166	0.181365
COG0396	6525	5842	1265	0.603974				COG0397	311	303	107	0.945202
COG0397	212	65.2	49.4	0.017713				COG0398	10940	11210	625	0.677263
COG0398	8829	8664	663	0.80985				COG0399	18210	12800	2864	0.0956
COG0399	19200	20150	2989	0.758784				COG0400	382	252	163	0.445357
COG0400	838	74.8	400	0.09253				COG0402	18780	17060	3361	0.622667
COG0402	17910	21470	2351	0.168474				COG0403	2574	4824	1437	0.155921
COG0403	1977	2909	1428	0.532228				COG0404	1001	897	207	0.628602
COG0404	704	1707	414	0.041483				COG0405	455	706	165	0.165702
COG0405	330	348	62.3	0.777693				COG0406	54990	46720	5459	0.16828
COG0406	54170	54090	9734	0.993644				COG0407	17980	13000	3424	0.183872
COG0407	16860	17800	2538	0.720706				COG0408	59.8	182	176	0.508388
COG0408	11.2	83.6	37.9	0.092572				COG0409	1141	1019	303	0.697484
COG0409	1063	738	199	0.140857				COG0410	8229	8599	1707	0.833779
COG0410	8138	5841	1981	0.279728				COG0411	7749	8237	1733	0.785358
COG0411	7668	5466	2039	0.311695				COG0412	2569	4691	1396	0.16687
COG0412	1882	2759	1465	0.56604				COG0413	3068	5080	1396	0.187396
COG0413	2582	4373	1095	0.140567				COG0414	5508	3127	1245	0.092098
COG0414	6797	8293	2429	0.555147				COG0415	272	422	188	0.448846
COG0415	212	221	55.7	0.886681				COG0416	15380	13580	1166	0.161123
COG0416	14490	14760	1780	0.883188				COG0417	98.8	333	156	0.171568
COG0417	27.4	178	38.2	0.004251				COG0418	60.2	181	176	0.510793
COG0418	8.8	83.2	38	0.08619				COG0419	18210	16850	3336	0.694209
COG0419	17670	21580	2279	0.124524				COG0420	20120	16060	1868	0.061528
COG0420	20620	20440	3412	0.959226				COG0421	9471	8889	1933	0.771005
COG0421	9330	10450	1243	0.393796				COG0422	6729	3905	1372	0.073549
COG0422	7943	9060	2575	0.675959				COG0423	10880	9246	2178	0.47455
COG0423	10610	12340	1385	0.246917				COG0424	11310	9872	2224	0.535941
COG0424	11470	12560	1792	0.559798				COG0425	14380	9754	3465	0.218577
COG0425	15930	21200	5051	0.327266				COG0426	22190	21640	4876	0.912976
COG0426	21560	25220	2697	0.211826				COG0427	7307	11070	2720	0.203838
COG0427	7144	7743	2778	0.834676				COG0428	13910	14190	3161	0.931585
COG0428	13280	15160	2039	0.383565				COG0429	62.4	182	176	0.515652
COG0429	11.2	85	38.3	0.090291				COG0431	10080	9633	3603	0.904319
COG0430	0	1	0.447	0.055767				COG0432	2652	1858	478	0.135204
COG0431	8967	5065	2837	0.206324				COG0433	4528	2536	1272	0.155899
COG0432	1795	2644	590	0.187886				COG0434	1127	593	201	0.028969
COG0433	5372	6354	2360	0.688214				COG0435	919	499	476	0.403544
COG0434	795	576	231	0.368813				COG0436	56980	55590	4828	0.780751
COG0435	1688	496	968	0.253364				COG0437	12270	11050	4023	0.769436
COG0436	56510	55240	3262	0.707221				COG0438	91770	80980	6343	0.127324
COG0437	12650	6270	3250	0.085247				COG0439	3918	2427	575	0.031923
COG0438	88980	89040	6556	0.992922				COG0440	18850	13030	4126	0.196015
COG0439	5444	2196	1081	0.016957				COG0441	15530	13480	1140	0.109927
COG0440	20580	24580	5458	0.484538				COG0442	16020	13750	1242	0.104947
COG0441	14790	14860	1666	0.967507				COG0443	20630	19990	2083	0.766515
COG0442	15050	15140	1628	0.957262				COG0444	33500	29390	5208	0.452772
COG0443	20180	19380	1540	0.617465				COG0445	14920	13150	1188	0.174478
COG0444	33060	36470	4407	0.4613				COG0446	17010	12860	2603	0.149495
COG0445	14250	14710	1596	0.780501				COG0447	1475	1392	473	0.86509
COG0446	18200	19970	3852	0.658126				COG0448	29150	21910	6233	0.27893
COG0447	1565	385	440	0.027723				COG0449	19350	19040	1955	0.877949
COG0448	31660	34390	6899	0.702668				COG0450	4950	6744	1489	0.262583
COG0449	17250	18210	1200	0.44696				COG0451	36100	28750	3897	0.096033
COG0450	4413	4750	1200	0.785956				COG0452	15200	13230	1115	0.115254
COG0451	33290	39870	5309	0.250323				COG0455	3458	5116	1317	0.243409
COG0452	14910	15020	2077	0.959057				COG0456	76760	67670	9582	0.370583
COG0455	3316	3085	1690	0.89464				COG0457	341	217	123	0.343876
COG0456	75930	75740	8281	0.982256				COG0458	22280	17130	2392	0.063486
COG0457	467	71.6	213	0.101372				COG0459	15110	13220	1116	0.128873
COG0458	23010	23460	4360	0.92034				COG0460	17100	12550	3085	0.178465
COG0459	14940	14780	1900	0.934964				COG0461	18880	13400	2767	0.082968
COG0460	18420	19980	3921	0.701137				COG0462	25190	19790	2411	0.055475
COG0461	20130	21540	3796	0.719984				COG0463	108800	83600	14752	0.125968
COG0462	25290	24210	4525	0.817363				COG0464	5470	6595	1356	0.430811
COG0463	110400	119600	20192	0.660777				COG0465	32190	28710	4526	0.464039
COG0464	3858	4169	1793	0.866631				COG0466	14670	11370	2973	0.299233
COG0465	32370	34260	3754	0.628224				COG0467	361	310	146	0.734717
COG0466	14530	18190	3102	0.271964				COG0468	15580	13520	1114	0.101484
COG0467	478	220	268	0.364352				COG0469	17810	17930	1859	0.950109
COG0468	14730	14900	1623	0.91917				COG0471	19350	21290	925	0.069327
COG0469	16900	17420	1351	0.710418				COG0472	22320	21720	1021	0.572823
COG0471	15430	17260	957	0.092194				COG0473	11780	9863	2257	0.420367
COG0472	20150	21820	1497	0.296869				COG0474	44990	38550	4304	0.172956
COG0473	11650	12940	1770	0.486823				COG0475	14490	14510	1771	0.991267
COG0474	41870	45130	6399	0.624188				COG0476	7617	4967	1049	0.035445
COG0475	11030	11790	1420	0.607056				COG0478	9	22.6	17.4	0.455813
COG0476	8723	9231	2409	0.838231				COG0479	3656	1689	1029	0.09229
COG0478	3.8	11.8	4.42	0.108232				COG0480	43280	35000	5638	0.18016
COG0479	3826	7020	2317	0.205303				COG0481	15070	13110	965	0.076718
COG0480	42740	47540	6652	0.491074				COG0482	16250	13730	1294	0.087395
COG0481	14500	14650	1647	0.929659				COG0483	5844	3541	962	0.043627
COG0482	15080	16260	1935	0.558815				COG0484	37520	32310	4922	0.320711
COG0483	6407	7992	2383	0.524656				COG0486	15150	13320	1173	0.157468
COG0484	36880	38390	4404	0.740524				COG0488	61410	52700	4783	0.106102
COG0486	14410	14850	1551	0.783869				COG0489	29140	23210	4492	0.223299
COG0488	63660	61390	8568	0.797758				COG0490	291	196	117	0.439097
COG0489	29760	33820	5405	0.474035				COG0491	25750	28130	6060	0.70476
COG0490	137	109	73.7	0.71388				COG0492	43170	39370	4083	0.379276
COG0491	24160	24440	4861	0.95548				COG0493	36560	32800	7013	0.606444
COG0492	42080	42150	3784	0.985695				COG0494	16040	14010	1127	0.109362
COG0493	36820	41930	5010	0.337625				COG0495	15400	13400	1116	0.110872
COG0494	15480	16620	2323	0.636715				COG0496	1100	954	213	0.51073
COG0495	14680	14800	1669	0.944431				COG0497	15150	13230	1061	0.107838
COG0496	950	1665	486	0.179766				COG0498	12920	10440	2029	0.256488
COG0497	14590	14830	1769	0.895445				COG0499	1161	787	225	0.134693
COG0498	13720	14500	2213	0.733594				COG0500	72.8	126	66.5	0.445194
COG0499	947	1768	423	0.08815				COG0501	4584	4604	1448	0.989319
COG0500	65.6	46.8	61.2	0.766502				COG0502	15340	11700	3064	0.268867
COG0501	3505	4045	1455	0.720179				COG0503	30360	27040	1691	0.085183
COG0502	16850	19110	3460	0.531909				COG0504	15320	13380	1028	0.095777
COG0503	27340	28820	3645	0.695391				COG0505	17370	14700	1216	0.059305
COG0504	14640	14590	1574	0.975433				COG0506	81.2	191	179	0.55508
COG0505	16800	16770	2453	0.990543				COG0507	24660	21150	3049	0.282863
COG0506	21.4	104	41.2	0.079667				COG0508	7082	8887	1528	0.2713
COG0507	23760	26890	3147	0.349026				COG0509	2093	1990	441	0.821011
COG0508	7558	3612	1635	0.042293				COG0510	2474	1798	678	0.347831
COG0509	1933	1917	655	0.981108				COG0511	14680	11510	2533	0.24605
COG0510	2297	1276	681	0.171971				COG0512	6248	3719	1302	0.087974
COG0511	15240	16680	2949	0.638484				COG0513	29810	32840	1686	0.109996
COG0512	7094	8580	2400	0.553096				COG0514	15980	15590	2290	0.868982
COG0513	25070	23270	1287	0.199353				COG0515	42420	31580	5474	0.083004
COG0514	15210	19320	1171	0.007973				COG0516	19020	16630	1353	0.115363
COG0515	44010	46880	8747	0.751247				COG0517	9372	8366	1906	0.611895
COG0516	17900	16890	2312	0.673712				COG0518	4913	4328	1389	0.68463
COG0517	9016	10280	1172	0.31222				COG0519	15400	13370	1082	0.097413
COG0518	4274	2983	1116	0.280817				COG0520	18270	18910	2561	0.808926
COG0519	14560	14980	1675	0.808327				COG0521	9947	9096	1495	0.584901
COG0520	16000	16120	1746	0.946882				COG0522	15520	13460	1091	0.09561
COG0521	10690	10520	1328	0.901296				COG0523	22310	21180	5331	0.837419
COG0522	14700	14810	1664	0.948929				COG0524	57370	51870	7157	0.464262
COG0523	23240	28590	3725	0.188898				COG0525	15410	13410	1122	0.112413
COG0524	53170	56120	5020	0.57295				COG0526	7980	5411	1183	0.061672
COG0525	14680	14800	1669	0.944452				COG0527	23430	19740	3310	0.297362
COG0526	6852	12170	3634	0.181521				COG0528	15400	13400	1117	0.111211
COG0527	22300	27580	3385	0.157379				COG0529	419	522	240	0.677608
COG0528	14680	14800	1668	0.944423				COG0530	9583	8948	2039	0.76344
COG0529	264	316	71.8	0.489833				COG0531	57640	59790	12701	0.869785
COG0530	9925	10860	1262	0.479817				COG0532	15230	13300	1033	0.098534
COG0531	48690	37030	9406	0.250224				COG0533	19060	18720	1854	0.859072
COG0532	14640	14750	1669	0.949058				COG0534	200300	156900	38619	0.293682
COG0533	17090	17990	1099	0.436539				COG0535	33100	26800	6502	0.360962
COG0534	204000	238400	36558	0.37426				COG0536	15560	13640	1114	0.123
COG0535	36180	39530	5669	0.570895				COG0537	16810	14570	1539	0.183734
COG0536	14790	14860	1689	0.967959				COG0538	10240	9184	2118	0.631425
COG0537	15950	15550	1958	0.84325				COG0539	24810	22370	2195	0.298508
COG0538	10720	11850	1702	0.525324				COG0540	13720	11360	1615	0.181982
COG0539	23510	24460	2598	0.724125				COG0541	15560	13590	1183	0.134455
COG0540	14050	14650	1786	0.745512				COG0542	38010	35280	1560	0.118245
COG0541	14820	14900	1692	0.963444				COG0543	24230	23030	5119	0.820549
COG0542	35710	34910	3025	0.798128				COG0544	24940	21500	2985	0.282418
COG0543	23730	25990	3184	0.498049				COG0545	1640	1198	686	0.537326
COG0544	26060	25550	3160	0.875779				COG0546	34780	29600	6454	0.445368
COG0545	1062	4334	1279	0.033741				COG0547	6272	3605	1302	0.074687
COG0546	35590	35470	5167	0.982041				COG0548	10440	9449	2012	0.635636
COG0547	7436	8539	2364	0.653175				COG0549	15400	12540	1610	0.11348
COG0548	10650	12100	1424	0.338295				COG0550	48320	44100	7634	0.595503
COG0549	15860	17930	3765	0.597437				COG0551	3265	5056	1514	0.270722
COG0550	45350	55820	6454	0.14341				COG0552	15410	13420	1122	0.114008
COG0551	3009	3253	1390	0.865018				COG0553	18030	17680	2336	0.884584
COG0552	14680	14800	1670	0.944468				COG0554	16250	14850	936	0.172969
COG0553	17940	16930	1269	0.448976				COG0555	3418	1548	992	0.096012
COG0554	14780	13840	1562	0.564002				COG0556	15570	13500	1208	0.124946
COG0555	3884	5973	2038	0.335339				COG0557	15200	13260	1033	0.097208
COG0556	14720	14860	1666	0.935106				COG0558	22620	20630	2572	0.461425
COG0557	14600	14720	1667	0.944365				COG0559	11110	9858	2180	0.581573
COG0558	21010	22980	2573	0.46595				COG0560	10290	9180	2047	0.602484
COG0559	11280	11230	1541	0.974912				COG0561	84800	75170	6694	0.188188
COG0560	10730	11730	1678	0.567587				COG0562	13370	11980	1090	0.238155
COG0561	79420	79150	9667	0.978402				COG0563	18940	18490	1838	0.812779
COG0562	13370	13770	1795	0.829207				COG0564	57090	48440	5051	0.125146
COG0563	17000	17970	1195	0.440348				COG0565	391	430	195	0.846309
COG0564	57570	59550	7543	0.799578				COG0566	39510	34890	3409	0.212393
COG0565	470	216	232	0.304908				COG0567	64	188	177	0.504248
COG0566	39180	41460	4799	0.647394				COG0568	22120	21160	1925	0.631325
COG0567	12.2	84.4	38.3	0.096311				COG0569	30350	26590	5460	0.510485
COG0568	19760	20630	1182	0.482618				COG0571	15450	13420	1128	0.109645
COG0569	29500	33000	3640	0.36448				COG0572	18740	18050	1873	0.722103
COG0571	14730	14840	1672	0.94916				COG0573	15450	13530	1108	0.121377
COG0572	17090	19180	1154	0.107675				COG0574	14620	12410	1463	0.169444
COG0573	14700	14760	1703	0.972755				COG0575	15390	13400	1119	0.113212
COG0574	13210	16420	2181	0.179211				COG0576	15240	13310	1032	0.098496
COG0575	14670	14800	1670	0.939859				COG0577	39610	30880	7039	0.250052
COG0576	14650	14780	1676	0.940082				COG0578	796	717	426	0.85622
COG0577	41090	49200	7548	0.313975				COG0579	7879	8490	1702	0.728826
COG0578	1050	1468	572	0.485722				COG0580	7044	6685	1833	0.849634
COG0579	7141	5857	1627	0.452649				COG0581	14600	13050	1068	0.184746
COG0580	6399	2963	1179	0.019492				COG0582	894	1152	851	0.769253
COG0581	14060	14590	1739	0.768324				COG0583	147700	138600	15100	0.563437
COG0582	288	709	155	0.026102				COG0584	19870	15540	2964	0.18218
COG0583	145600	149800	16346	0.803706				COG0585	90	241	169	0.398854
COG0584	20180	23300	4660	0.522029				COG0586	13120	14430	2314	0.586892
COG0585	24.6	164	33.2	0.003027				COG0587	16140	13770	1220	0.088097
COG0586	10280	9737	1965	0.789328				COG0588	7710	7080	2891	0.832975
COG0587	15710	15200	1817	0.786109				COG0589	15120	15120	4674	>0.999999
COG0588	6552	4702	2235	0.431875				COG0590	15550	13720	1078	0.128121
COG0589	13050	6489	3102	0.067364				COG0591	18060	16340	3659	0.65088
COG0590	14560	15010	1784	0.807173				COG0592	16300	13910	1288	0.100666
COG0591	18870	21310	2568	0.36989				COG0593	15470	13680	1072	0.133641
COG0592	15580	15120	1850	0.809892				COG0594	15170	13330	1168	0.153747
COG0593	14690	14900	1693	0.904337				COG0595	22070	19330	2588	0.320613
COG0594	14440	14690	1675	0.885032				COG0596	41780	37520	3081	0.204174
COG0595	19830	18000	2858	0.539848				COG0597	16350	14010	1387	0.130082
COG0596	39050	43540	5750	0.457332				COG0598	15930	13580	1402	0.132156
COG0597	15420	15500	1870	0.966931				COG0599	14000	12340	930	0.11221
COG0598	15300	16620	2334	0.587208				COG0600	25370	23750	5252	0.76561
COG0599	12790	14200	1625	0.410961				COG0601	32690	28760	4913	0.446817
COG0600	25570	26000	3325	0.900304				COG0602	14620	13060	1020	0.164798
COG0601	30860	35820	4430	0.295317				COG0603	2055	1456	216	0.023953
COG0602	14160	14940	2055	0.714178				COG0604	4788	4700	1358	0.949927
COG0603	2992	1520	651	0.053579				COG0605	3818	5706	1660	0.288275
COG0604	4401	2821	1003	0.153853				COG0606	11150	9400	1981	0.402736
COG0605	3225	4308	1323	0.436681				COG0607	21990	16370	3023	0.100117
COG0606	10650	12350	1357	0.24558				COG0608	15360	13210	1021	0.068267
COG0607	24100	25040	5477	0.867989				COG0609	26440	25290	4506	0.805006
COG0608	14460	14870	1685	0.81384				COG0610	14790	14000	1395	0.586808
COG0609	26060	27860	2606	0.50927				COG0611	884	650	268	0.406964
COG0610	12520	12280	1840	0.899424				COG0612	21430	24880	1605	0.063849
COG0611	639	2704	751	0.025086				COG0613	10960	10410	1950	0.785066
COG0612	16880	20040	1867	0.129044				COG0614	26190	25340	4387	0.851207
COG0613	9303	7863	1452	0.350493				COG0615	10100	5264	2391	0.077761
COG0614	25350	27830	2122	0.276143				COG0616	1795	1475	560	0.583198
COG0615	10620	13950	4476	0.478166				COG0617	15610	13550	935	0.058602
COG0616	1577	2253	582	0.278807				COG0618	19190	14950	2376	0.112117
COG0617	14890	14990	1628	0.95254				COG0619	44360	37480	3543	0.08808
COG0618	18770	20510	3547	0.636931				COG0620	7263	5533	759	0.052149
COG0619	44020	40470	4955	0.494118				COG0621	31120	26840	5970	0.493844
COG0620	9214	4453	1276	0.005768				COG0622	26670	21840	4120	0.274842
COG0621	31200	36430	4371	0.265792				COG0623	1665	1522	479	0.772877
COG0622	27510	28990	3994	0.720581				COG0624	38620	34380	2878	0.178953
COG0623	1689	1582	689	0.880448				COG0625	1252	1878	1124	0.592953
COG0624	37130	38170	4210	0.811106				COG0626	6803	9100	1264	0.106774
COG0625	1312	885	407	0.324646				COG0627	7273	4563	1285	0.06803
COG0626	5389	4144	1439	0.412213				COG0628	34200	31330	2943	0.358042
COG0627	5668	8065	2303	0.328343				COG0629	34970	32070	4330	0.521911
COG0628	32870	33740	2464	0.733145				COG0630	488	484	188	0.983579
COG0629	33310	36430	4515	0.509115				COG0631	20360	15670	2559	0.104177
COG0630	540	352	144	0.227599				COG0632	15400	13490	1123	0.127271
COG0631	21120	20700	3595	0.909871				COG0633	619	1103	691	0.503408
COG0632	14680	14810	1662	0.939582				COG0634	14780	14020	798	0.368796
COG0633	430	507	150	0.619906				COG0635	21900	18960	4186	0.502381
COG0634	13720	11400	1097	0.067399				COG0636	10500	9222	1975	0.535694
COG0635	21890	23460	3061	0.621833				COG0637	35550	33270	3168	0.492179
COG0636	10700	12430	1436	0.262597				COG0638	30.2	59	15.1	0.093207
COG0637	32260	34400	2907	0.482731				COG0639	60.2	181	176	0.512006
COG0638	16	80.8	52.9	0.255812				COG0640	36120	29770	5299	0.265084
COG0639	8.4	83.6	38.3	0.084998				COG0641	21470	17230	4597	0.38332
COG0640	36370	40280	5088	0.464252				COG0642	243600	201300	43899	0.363473
COG0641	21690	27980	4171	0.170006				COG0643	5322	6676	1405	0.363475
COG0642	244800	298200	44196	0.261452				COG0644	5959	6679	1440	0.630465
COG0643	4594	4082	1928	0.797277				COG0645	57.2	23	18.1	0.096208
COG0644	4080	4563	1642	0.776192				COG0646	9292	8700	1933	0.767178
COG0645	22.6	22.2	6.75	0.954167				COG0647	4831	4042	1363	0.578586
COG0646	9190	10160	1295	0.475409				COG0648	14040	10610	2877	0.267276
COG0647	4296	3014	1079	0.268691				COG0649	616	545	208	0.741103
COG0648	14100	17790	3103	0.268498				COG0650	757	692	258	0.806848
COG0649	446	1484	379	0.025379				COG0651	6456	7915	1570	0.379972
COG0650	613	561	172	0.770994				COG0652	21220	16440	2475	0.089518
COG0651	6179	6235	1417	0.96945				COG0653	17820	15620	859	0.033618
COG0652	20050	22960	4007	0.488364				COG0654	620	1104	693	0.504922
COG0653	17230	15220	1587	0.240928				COG0655	39080	34500	7244	0.544892
COG0654	422	505	150	0.594618				COG0656	32440	27430	5071	0.352097
COG0655	39710	44140	4969	0.398678				COG0657	44440	37900	4094	0.14887
COG0656	30720	26300	6420	0.510613				COG0658	4091	5149	1240	0.418339
COG0657	43240	46230	7028	0.681732				COG0659	7050	4384	1329	0.079733
COG0658	3168	4647	1089	0.211492				COG0661	5374	4185	532	0.055708
COG0659	7946	7813	2209	0.953464				COG0662	11360	13010	2935	0.589355
COG0661	6242	3801	856	0.021413				COG0663	11620	9542	2687	0.461488
COG0662	9777	14060	1622	0.029724				COG0664	48270	46100	8014	0.793428
COG0663	12320	16630	3002	0.189006				COG0665	5489	7553	1965	0.32422
COG0664	47560	55310	4161	0.099554				COG0666	1509	1459	182	0.790064
COG0665	4444	4742	1491	0.846593				COG0667	20780	15570	3007	0.121449
COG0666	1736	1160	526	0.305275				COG0668	15110	13520	887	0.110921
COG0667	20720	22420	3423	0.632823				COG0669	15450	13420	1134	0.111096
COG0668	14130	15890	2120	0.430599				COG0670	9394	10140	1247	0.566108
COG0669	14710	14830	1663	0.944261				COG0671	16280	12840	2234	0.162167
COG0670	8535	7518	1170	0.409986				COG0672	64.4	184	177	0.518191
COG0671	15560	19870	3565	0.261164				COG0673	48260	38240	5775	0.120947
COG0672	19.6	87	39.1	0.123355				COG0674	20360	21520	4461	0.801393
COG0673	37810	43810	3785	0.151571				COG0675	45920	28390	10473	0.132705
COG0674	19200	22470	2691	0.258991				COG0676	61.8	183	176	0.512904
COG0675	49740	62680	18271	0.498922				COG0677	3411	5187	1443	0.253317
COG0676	8.4	83.2	38	0.084448				COG0678	1	0.4	0.4	0.171995
COG0677	2598	4368	1116	0.151428				COG0679	27570	22150	4511	0.26396
COG0678	3.4	0.8	1.14	0.052022				COG0680	725	881	419	0.72012
COG0679	28400	32420	5636	0.495957				COG0681	26700	22370	2973	0.183315
COG0680	581	390	118	0.142111				COG0682	18440	14520	2048	0.091915
COG0681	28180	29270	3735	0.777867				COG0683	13200	14160	3050	0.760974
COG0682	17930	20260	3525	0.527154				COG0684	5091	6236	1136	0.343101
COG0683	12980	13790	2219	0.724546				COG0685	10940	9376	2135	0.484725
COG0684	3517	5012	748	0.080546				COG0686	739	679	211	0.785903
COG0685	11080	12220	1706	0.522827				COG0687	14690	12840	1028	0.109554
COG0686	503	426	103	0.471226				COG0688	7397	3878	1616	0.06107
COG0687	14020	13530	1344	0.724898				COG0689	2899	5099	1445	0.166351
COG0688	8248	10660	3238	0.477585				COG0690	9445	10780	546	0.040261
COG0689	2293	3045	1421	0.611084				COG0691	15400	13400	1117	0.111223
COG0690	7151	6483	977	0.51344				COG0692	10940	7539	1624	0.069513
COG0691	14680	14800	1668	0.944423				COG0693	17360	17820	1732	0.797272
COG0692	11430	11250	3190	0.95639				COG0694	1307	1281	215	0.906685
COG0693	16530	17540	987	0.336164				COG0695	3087	2721	685	0.60779
COG0694	1375	710	269	0.038785				COG0696	11220	9558	2166	0.465007
COG0695	2517	1198	350	0.005511				COG0697	26760	25030	4947	0.735606
COG0696	10910	12370	1417	0.332987				COG0698	16940	13760	3196	0.3489
COG0697	26740	28580	2907	0.544382				COG0700	5069	6811	1527	0.287052
COG0698	15900	14950	2839	0.746543				COG0701	7953	11300	2816	0.268712
COG0700	3594	4193	1461	0.692569				COG0702	1722	2034	627	0.632147
COG0701	6648	7200	3088	0.862589				COG0703	19950	14100	4175	0.198698
COG0702	1714	677	527	0.084761				COG0704	14960	13180	1157	0.162641
COG0703	21580	24900	5541	0.565646				COG0705	13840	12780	801	0.222267
COG0704	14270	14660	1635	0.817458				COG0706	19650	17090	1375	0.099609
COG0705	13460	14410	1633	0.576788				COG0707	22170	20930	2140	0.578291
COG0706	19040	17070	2335	0.423315				COG0708	15830	14000	701	0.031138
COG0707	20540	20010	1338	0.702423				COG0709	7819	7488	1846	0.862186
COG0708	15480	14840	1652	0.708586				COG0710	9067	9051	1425	0.991318
COG0709	8491	9718	1404	0.407503				COG0711	18230	14470	2187	0.123909
COG0710	9399	9928	1701	0.76379				COG0712	17650	14030	2152	0.13104
COG0711	17910	20350	3681	0.526036				COG0713	616	546	208	0.741965
COG0712	17320	19870	3624	0.501576				COG0714	26170	19700	5498	0.273106
COG0713	446	1484	379	0.025379				COG0715	26230	23170	5452	0.589998
COG0714	28340	34330	6061	0.351948				COG0716	33690	30070	3459	0.325841
COG0715	26030	30140	3921	0.325199				COG0717	818	737	233	0.738737
COG0716	33490	35280	3278	0.599904				COG0718	14960	13310	1058	0.157582
COG0717	622	627	110	0.967526				COG0719	17170	17340	1547	0.91519
COG0718	14350	13450	1354	0.52496				COG0720	1848	1177	282	0.044558
COG0719	15400	11310	719	0.000462				COG0721	10630	7364	1574	0.071615
COG0720	1556	2083	476	0.29996				COG0722	9530	5088	2570	0.122145
COG0721	9523	9776	2621	0.925487				COG0723	230	335	73.1	0.190372
COG0722	11730	13060	4601	0.779882				COG0724	601	442	175	0.390531
COG0723	213	145	75.7	0.398031				COG0725	8691	7987	1819	0.708898
COG0724	693	251	226	0.086501				COG0726	41350	38650	8829	0.767553
COG0725	9401	10190	1470	0.606145				COG0727	4214	1907	1044	0.058146
COG0726	40190	47690	5574	0.215345				COG0728	3471	5461	1464	0.211223
COG0727	5207	6170	2032	0.648299				COG0729	62	182	176	0.516196
COG0728	3145	3236	1483	0.95259				COG0730	19140	19040	1854	0.9583
COG0729	9	84.4	38.4	0.085517				COG0731	676	449	173	0.225935
COG0730	16560	18420	943	0.083981				COG0732	31700	30690	2736	0.721635
COG0731	472	1442	362	0.027905				COG0733	29050	21670	6100	0.260864
COG0732	29610	22270	1055	0.000117				COG0735	33740	29380	4994	0.408077
COG0733	30130	35550	6511	0.429341				COG0736	6387	4550	688	0.028425
COG0735	33180	38760	5147	0.309938				COG0737	22390	21340	1762	0.567644
COG0736	5859	3792	735	0.022724				COG0738	16510	12060	2665	0.133466
COG0737	21760	24410	3064	0.412243				COG0739	39190	38320	5666	0.881777
COG0738	15950	20970	3386	0.176508				COG0740	32300	28830	4065	0.418157
COG0739	31860	41390	3475	0.025367				COG0741	10610	9686	1917	0.642693
COG0740	31170	35620	3772	0.271965				COG0742	15450	13420	1124	0.108575
COG0741	10380	12050	1362	0.254861				COG0743	10940	9530	2018	0.504522
COG0742	14700	14810	1666	0.94897				COG0744	16150	16060	1162	0.940141
COG0743	10840	12430	1472	0.311646				COG0745	260400	224400	41400	0.409864
COG0744	15150	11470	1268	0.019806				COG0746	4899	2870	662	0.015479
COG0745	260800	292400	38537	0.435967				COG0747	31640	29080	4017	0.541779
COG0746	5220	6086	1977	0.672963				COG0748	1.6	0.6	0.566	0.115036
COG0747	29780	34580	4149	0.280701				COG0749	19240	18820	1965	0.83613
COG0748	3.2	1.6	1.1	0.182184				COG0750	15280	13190	1050	0.081793
COG0749	17270	18340	1168	0.386283				COG0751	4551	4212	1376	0.811596
COG0750	14450	14880	1688	0.805388				COG0752	4521	4153	1371	0.795151
COG0751	4080	2539	1017	0.168106				COG0753	879	545	240	0.202275
COG0752	4063	2458	1061	0.168957				COG0754	122	363	352	0.512294
COG0753	875	1496	464	0.217466				COG0755	876	710	244	0.514089
COG0754	28.4	170	77.6	0.105729				COG0756	15960	13530	1192	0.075878
COG0755	698	1552	381	0.055532				COG0757	5579	6729	1434	0.4457
COG0756	15100	15410	1900	0.874425				COG0758	15440	13280	1089	0.082687
COG0757	3813	5163	1330	0.339815				COG0759	13970	12370	830	0.089893
COG0758	14580	14770	1630	0.910068				COG0760	8696	10190	781	0.092081
COG0759	13010	14170	1545	0.474376				COG0761	4430	3310	606	0.101595
COG0760	6932	8691	562	0.014008				COG0762	294	247	102	0.658128
COG0761	5125	3661	783	0.09828				COG0763	630	538	214	0.677194
COG0762	269	64	56.6	0.006823				COG0764	13860	12190	1100	0.167502
COG0763	454	1506	382	0.024993				COG0765	55200	48930	3762	0.134125
COG0764	14590	13190	1401	0.347075				COG0766	22760	20170	2091	0.250595
COG0765	53280	47710	7542	0.481271				COG0767	807	697	246	0.666556
COG0766	22080	23970	2621	0.491381				COG0768	51620	43790	5938	0.223824
COG0767	634	1552	394	0.048158				COG0769	27830	24850	1849	0.145781
COG0768	51100	55650	7341	0.55265				COG0770	15060	13260	1098	0.139653
COG0769	27050	27400	3282	0.917695				COG0771	15020	13240	1067	0.133857
COG0770	14330	14750	1722	0.813461				COG0772	44610	40040	5205	0.405501
COG0771	14410	14770	1750	0.842172				COG0773	14940	13240	965	0.116287
COG0772	43560	48220	5613	0.430517				COG0774	631	537	215	0.674185
COG0773	14290	14770	1761	0.792076				COG0775	15080	13280	974	0.101826
COG0774	451	1506	382	0.024712				COG0776	23880	20920	2767	0.315956
COG0775	14310	14640	1718	0.852483				COG0777	12220	10650	1546	0.339583
COG0776	22380	28580	3631	0.126096				COG0778	53160	46180	5108	0.208935
COG0777	12590	12480	1515	0.943892				COG0779	14690	12950	922	0.095779
COG0778	48840	59660	8158	0.221335				COG0780	384	374	86.4	0.916069
COG0779	14230	14620	1728	0.827111				COG0781	15790	13690	1109	0.094831
COG0780	333	204	56.2	0.050075				COG0782	26130	23840	1683	0.210749
COG0781	14840	14870	1695	0.986309				COG0783	4354	4212	1239	0.911599
COG0782	25290	26510	3378	0.727347				COG0784	7884	3561	2141	0.078112
COG0783	4350	2480	1045	0.111225				COG0785	2419	1566	323	0.02982
COG0784	9544	12300	3939	0.503915				COG0786	5350	6908	1671	0.378411
COG0785	1853	1428	366	0.278657				COG0787	17700	17910	1752	0.907538
COG0786	5202	4264	1683	0.592608				COG0788	250	238	198	0.952456
COG0787	16260	17600	1130	0.269714				COG0789	64960	62960	8981	0.829351
COG0788	304	132	248	0.506437				COG0790	12850	14970	2351	0.393617
COG0789	60460	62150	6409	0.798675				COG0791	59780	52020	6746	0.283249
COG0790	11050	12240	1686	0.500368				COG0792	11390	9638	1955	0.396296
COG0791	61270	65690	8476	0.616143				COG0793	15730	15070	3168	0.840177
COG0792	11070	12250	1557	0.470314				COG0794	3026	2329	549	0.239733
COG0793	14710	21130	1957	0.011178				COG0795	1534	1257	568	0.638981
COG0794	1872	2853	510	0.090843				COG0796	14380	12670	818	0.069831
COG0795	1418	3017	949	0.130366				COG0797	398	459	174	0.7316
COG0796	13870	14300	1657	0.801768				COG0798	5305	5507	1461	0.893436
COG0797	278	303	60.7	0.684314				COG0799	14740	13020	1032	0.134302
COG0798	5198	8294	1002	0.01492				COG0800	14970	14730	2979	0.93777
COG0799	14250	14670	1734	0.81471				COG0801	7555	4611	930	0.01326
COG0800	14730	17090	1890	0.247181				COG0802	15400	13400	1117	0.111223
COG0801	9037	8687	2302	0.882906				COG0803	15720	17030	1233	0.319061
COG0802	14680	14800	1669	0.944431				COG0804	2764	855	1000	0.09275
COG0803	15970	13170	1761	0.15046				COG0805	1162	928	290	0.442411
COG0804	3126	5383	1927	0.275288				COG0806	15690	13540	1251	0.124022
COG0805	900	1619	404	0.112725				COG0807	525	531	200	0.975272
COG0806	15400	14880	1868	0.787764				COG0809	11740	9867	2135	0.405984
COG0807	546	311	121	0.089114				COG0810	11590	6533	2341	0.062814
COG0809	11610	13750	1893	0.290914				COG0811	2749	2133	430	0.18965
COG0810	10950	17170	4294	0.185462				COG0812	14980	13190	913	0.085673
COG0811	1840	4664	1119	0.035654				COG0813	9584	8630	1536	0.551903
COG0812	14440	14690	1767	0.891016				COG0814	376	1097	1055	0.51355
COG0813	9024	9478	1102	0.691095				COG0815	760	562	264	0.472927
COG0814	61.6	512	232	0.087632				COG0816	15270	13370	1171	0.143203
COG0815	916	1420	595	0.421834				COG0817	5175	6368	1392	0.416365
COG0816	14420	14800	1780	0.836286				COG0818	4176	3442	540	0.211327
COG0817	3725	5089	1434	0.369392				COG0819	2075	4227	1299	0.136064
COG0818	3977	1883	419	0.001056				COG0820	12170	10090	2313	0.3947
COG0819	1763	2512	1462	0.622183				COG0821	10910	9330	2011	0.454639
COG0820	11920	12970	1746	0.56431				COG0822	23970	21520	3250	0.472526
COG0821	10690	12340	1462	0.291692				COG0823	1415	1304	394	0.785301
COG0822	23090	22290	2420	0.749417				COG0824	8137	4843	1491	0.058201
COG0823	969	2123	495	0.047923				COG0825	7844	9252	1523	0.382354
COG0824	8589	10510	2597	0.480694				COG0826	23270	19840	4667	0.483349
COG0825	8052	5201	1528	0.099102				COG0827	3812	3559	1403	0.861368
COG0826	23520	25570	3750	0.599525				COG0828	5004	2452	1279	0.081115
COG0827	3461	2234	1024	0.26505				COG0829	2764	855	1000	0.092781
COG0828	6464	6777	1954	0.876696				COG0830	2764	855	1000	0.09275
COG0829	3127	5384	1928	0.275421				COG0831	2764	855	1000	0.09275
COG0830	3126	5383	1927	0.275288				COG0832	56.8	25.2	20.3	0.159064
COG0831	3126	5383	1927	0.275288				COG0833	8495	7400	2993	0.723986
COG0832	24.4	22.6	7.39	0.813694				COG0834	62600	52680	5260	0.096052
COG0833	8589	4827	2946	0.237488				COG0835	10200	12960	2703	0.337114
COG0834	62510	63510	10538	0.926734				COG0836	6819	6177	1532	0.686157
COG0835	10170	8224	3530	0.59649				COG0837	3.6	0.6	0.906	0.010661
COG0836	6360	9892	1170	0.016574				COG0838	616	546	208	0.741965
COG0837	3.8	1.4	1.22	0.085672				COG0839	616	546	208	0.741965
COG0838	446	1484	379	0.025379				COG0840	59560	81720	18671	0.269324
COG0839	446	1484	379	0.025379				COG0841	9343	9874	1885	0.785295
COG0840	57890	50650	22333	0.754117				COG0842	8422	9030	1882	0.754968
COG0841	8164	12900	1305	0.006698				COG0843	263	399	176	0.463478
COG0842	6223	10520	1096	0.004418				COG0845	23760	20440	4047	0.435817
COG0843	206	209	56.5	0.950773				COG0846	26490	17820	4273	0.076986
COG0845	23910	31680	4287	0.107466				COG0847	6149	7648	1368	0.304931
COG0846	27100	33080	7500	0.448253				COG0848	1704	1183	487	0.316152
COG0847	4632	6419	1000	0.111842				COG0849	8429	9714	419	0.015499
COG0848	1389	4223	1208	0.046912				COG0850	3102	2477	469	0.219582
COG0849	7069	7289	421	0.615139				COG0851	2887	2452	443	0.354496
COG0850	3896	1998	691	0.025109				COG0852	309	444	168	0.445362
COG0851	3643	1726	638	0.016959				COG0853	5264	2587	1281	0.070109
COG0852	227	224	54.4	0.960207				COG0854	514	446	209	0.752954
COG0853	6676	8152	2476	0.567604				COG0855	14690	11240	2486	0.202631
COG0854	390	1353	415	0.048972				COG0856	29	16	4.68	0.024003
COG0855	15020	17850	3140	0.39371				COG0857	0.6	0.4	0.469	0.681047
COG0856	49.4	17.2	30.4	0.320663				COG0858	15400	13400	1117	0.111219
COG0857	2.8	0.6	1.22	0.110129				COG0859	1937	2064	662	0.852616
COG0858	14680	14800	1668	0.94441				COG0860	33370	27940	6877	0.452563
COG0859	1096	2186	445	0.03982				COG0861	4507	4463	1435	0.976297
COG0860	33990	40820	6117	0.296594				COG0863	12960	14490	2495	0.55681
COG0861	3480	2880	1266	0.648174				COG0864	704	524	128	0.196094
COG0863	11510	10250	2810	0.665781				COG1001	9861	8731	1947	0.577631
COG0864	612	495	162	0.493242				COG1002	646	384	177	0.17667
COG1001	9626	10350	1217	0.568221				COG1003	2821	4920	1434	0.181386
COG1002	606	1343	418	0.115883				COG1004	7126	4015	1345	0.049512
COG1003	2161	4107	1090	0.11199				COG1005	616	546	208	0.741965
COG1004	7860	8853	2269	0.673251				COG1006	367	406	65.4	0.573167
COG1005	446	1484	379	0.025379				COG1007	616	546	208	0.744558
COG1006	301	230	78	0.391712				COG1008	791	705	241	0.730599
COG1007	446	1483	378	0.025446				COG1009	1407	1097	317	0.356644
COG1008	632	1530	391	0.050781				COG1010	9070	8350	1461	0.635389
COG1009	1128	1696	399	0.192173				COG1011	26040	21620	3219	0.206989
COG1010	9876	9993	1120	0.919392				COG1012	30830	29870	3278	0.777099
COG1011	26930	28750	4294	0.682862				COG1013	10880	9347	1982	0.461587
COG1012	28280	33240	3779	0.225703				COG1014	10490	9973	1761	0.776504
COG1013	10510	13570	1749	0.118275				COG1015	13420	11450	1608	0.255357
COG1014	9431	9265	1294	0.901123				COG1017	173	216	187	0.825579
COG1015	14130	11820	1315	0.117001				COG1018	256	758	699	0.492836
COG1017	22.4	85.2	38	0.13692				COG1020	21290	20190	1627	0.51805
COG1018	128	353	163	0.204356				COG1021	281	296	227	0.947637
COG1020	20000	22150	2601	0.432337				COG1022	6790	3186	1245	0.020038
COG1021	240	127	89.9	0.244953				COG1023	14	93.4	46.2	0.124281
COG1022	8244	10180	2728	0.498024				COG1024	9085	12910	3126	0.255908
COG1023	10.2	15	9.82	0.638249				COG1025	59	181	176	0.507306
COG1024	9170	7602	3278	0.645216				COG1026	9943	8553	1962	0.498707
COG1025	8	82.6	38.2	0.086454				COG1027	3916	1690	1060	0.069039
COG1026	10050	10620	1272	0.666045				COG1028	82420	75980	10759	0.566033
COG1027	4003	7286	2417	0.211401				COG1030	727	584	169	0.419601
COG1028	77340	83720	7276	0.40615				COG1032	34160	29100	6234	0.440473
COG1030	479	1457	334	0.019055				COG1033	10490	9092	2056	0.515655
COG1032	34860	37210	4261	0.59631				COG1034	745	660	194	0.671716
COG1033	10520	10980	1150	0.699678				COG1035	5527	2686	1188	0.043734
COG1034	666	456	69	0.016126				COG1036	23.2	96.6	46.7	0.154731
COG1035	6804	7929	2121	0.610178				COG1038	7422	6898	1841	0.783112
COG1036	7.6	32.8	10.7	0.046876				COG1039	1098	792	340	0.395275
COG1038	7992	9389	1033	0.213435				COG1040	15020	13240	1068	0.134281
COG1039	1439	493	475	0.081539				COG1041	4369	1842	1192	0.066814
COG1040	14410	14770	1750	0.84215				COG1042	595	577	152	0.912712
COG1041	5923	6520	1990	0.771827				COG1043	785	594	239	0.446029
COG1042	452	454	104	0.98518				COG1044	3153	2156	441	0.053746
COG1043	530	1613	393	0.024731				COG1045	15870	15910	3578	0.991355
COG1044	1853	2946	371	0.018509				COG1047	4602	2241	895	0.029755
COG1045	16870	16600	2630	0.920768				COG1048	11780	9887	2455	0.462816
COG1047	4900	7227	2388	0.358354				COG1049	61.2	182	176	0.511987
COG1048	12250	12570	2174	0.886622				COG1051	55440	45220	5953	0.124361
COG1049	11.6	84.2	38.1	0.09341				COG1052	28820	27660	1562	0.478909
COG1051	57960	55220	9199	0.773401				COG1053	35890	30600	2080	0.034523
COG1052	25710	23790	2026	0.371062				COG1054	383	474	303	0.77148
COG1053	33610	30290	5221	0.542583				COG1055	15780	12370	2210	0.161343
COG1054	693	187	424	0.267106				COG1056	387	214	111	0.156382
COG1055	14970	19220	3308	0.234879				COG1057	15560	13570	1106	0.109728
COG1056	351	246	98.7	0.31657				COG1058	6098	7476	1272	0.310107
COG1057	14800	14870	1696	0.968099				COG1059	13.8	92.8	46.2	0.125945
COG1058	5074	5199	1282	0.924717				COG1060	11640	6217	2678	0.077409
COG1059	2.8	14	9.14	0.255077				COG1061	20450	18640	2474	0.485286
COG1060	12480	16480	4687	0.418239				COG1062	1155	1239	447	0.855532
COG1061	21410	23450	2544	0.445798				COG1063	42380	32450	5656	0.117201
COG1062	1287	277	525	0.090262				COG1064	2871	2735	889	0.882219
COG1063	40560	43890	7974	0.687214				COG1066	15340	13190	1133	0.094376
COG1064	3504	653	749	0.005179				COG1067	2768	4721	1408	0.202877
COG1066	14300	14890	1626	0.726181				COG1069	144	238	174	0.602499
COG1067	2030	2969	1451	0.535634				COG1070	44880	32990	5767	0.073149
COG1069	91	131	49.3	0.440543				COG1071	2476	2126	473	0.480768
COG1070	43280	47250	8372	0.648044				COG1072	4085	3773	1382	0.827001
COG1071	2669	608	166	2e-06				COG1073	15770	13580	1266	0.121806
COG1072	3509	2319	1042	0.286396				COG1074	15120	13220	1038	0.104542
COG1073	15210	16170	2384	0.697691				COG1075	750	479	187	0.185801
COG1074	14470	14840	1736	0.836599				COG1076	120	362	352	0.510331
COG1075	761	462	317	0.372281				COG1077	27750	25090	2094	0.239672
COG1076	17.2	167	76.3	0.086051				COG1078	4786	4147	1401	0.660491
COG1077	26010	27280	2882	0.671162				COG1079	16160	16300	2137	0.949376
COG1078	4444	2737	825	0.072277				COG1080	24050	18010	2953	0.07504
COG1079	15110	16100	1340	0.481229				COG1082	29430	23370	4748	0.237635
COG1080	25160	26200	5248	0.847847				COG1083	1562	779	330	0.044972
COG1082	25340	26840	2417	0.552141				COG1085	3817	4197	1818	0.839666
COG1083	1604	648	639	0.173212				COG1086	12890	10270	2214	0.270697
COG1085	1899	2157	953	0.793376				COG1087	16290	14710	958	0.13768
COG1086	13990	13710	1490	0.85558				COG1088	15870	11940	2450	0.147391
COG1087	14680	15010	1811	0.859921				COG1089	4801	1942	1277	0.055497
COG1088	16580	19720	3607	0.409337				COG1090	249	359	180	0.559741
COG1089	4612	7506	2099	0.205372				COG1091	16670	12260	2640	0.133334
COG1090	196	132	66.2	0.362217				COG1092	18610	16140	3915	0.545719
COG1091	17390	20210	3504	0.444199				COG1096	391	126	116	0.051099
COG1092	19700	22970	3012	0.30919				COG1098	6850	7579	792	0.38419
COG1096	166	198	81.4	0.697381				COG1100	31.8	60	14.8	0.093831
COG1098	6121	5899	776	0.782179				COG1101	19030	16570	3254	0.471282
COG1100	21.6	82.4	53.5	0.288542				COG1102	36590	21250	9098	0.130268
COG1101	21360	21710	2694	0.899854				COG1104	30580	29110	2096	0.502897
COG1102	42730	50470	13257	0.575413				COG1105	14890	12750	1702	0.244004
COG1104	29190	28970	2246	0.924391				COG1106	11810	5921	3052	0.089812
COG1105	14350	13900	2682	0.870907				COG1107	170	43.2	121	0.324255
COG1106	12420	15650	4575	0.500202				COG1108	12470	12840	788	0.651387
COG1107	290	31.2	243	0.318598				COG1109	39100	33900	3809	0.209356
COG1108	12410	9109	956	0.008666				COG1110	13.2	9.4	5.88	0.536423
COG1109	38540	39580	4626	0.82774				COG1111	120	30	121	0.478982
COG1110	5.6	4.2	1.45	0.36232				COG1112	7148	7916	1571	0.638157
COG1111	260	5	242	0.322235				COG1113	14820	14640	5816	0.976069
COG1112	6339	6348	1553	0.995518				COG1114	10010	11330	832	0.151328
COG1113	11620	9530	5029	0.68862				COG1115	34040	31730	7782	0.774138
COG1114	9197	6359	889	0.012754				COG1116	20890	17800	4037	0.466024
COG1115	34590	39830	5428	0.362612				COG1117	17150	14490	1451	0.10407
COG1116	20870	22000	2918	0.70868				COG1118	6068	3160	1325	0.059543
COG1117	16810	16910	2557	0.969757				COG1119	688	429	270	0.366608
COG1118	7196	7622	2329	0.859434				COG1120	23210	20060	3362	0.376148
COG1119	1123	1341	544	0.699046				COG1121	15650	14620	785	0.226124
COG1120	23440	24790	2507	0.604939				COG1122	47760	39020	4631	0.095844
COG1121	14820	14030	1540	0.62184				COG1123	35500	30740	4161	0.285721
COG1122	48460	46600	6609	0.78552				COG1124	538	518	264	0.943228
COG1123	33910	36790	5169	0.592625				COG1125	4399	6061	1482	0.294475
COG1124	445	248	128	0.162545				COG1126	49150	43260	3024	0.087261
COG1125	4399	3419	1412	0.507302				COG1127	634	539	213	0.667752
COG1126	48020	43690	5789	0.475878				COG1129	44110	32100	8992	0.218409
COG1127	456	1508	382	0.025012				COG1131	154200	135200	19821	0.365849
COG1129	44680	56080	10494	0.308983				COG1132	183800	165900	18592	0.363846
COG1131	152900	157300	19717	0.829003				COG1133	0.8	0	0.374	0.06498
COG1132	174800	177600	18356	0.882541				COG1134	14010	10530	3110	0.295568
COG1133	0.4	0.4	0.469	>0.999999				COG1135	13530	12390	1055	0.311362
COG1134	14280	16560	3215	0.49832				COG1136	123700	103800	17148	0.279314
COG1135	13120	13050	1309	0.958656				COG1137	755	569	213	0.405855
COG1136	124500	130500	17863	0.7456				COG1138	358	331	222	0.906016
COG1137	715	1511	447	0.112669				COG1139	8129	4854	1204	0.026202
COG1138	281	169	96.5	0.279469				COG1140	1141	1226	444	0.85301
COG1139	8839	7740	1642	0.522085				COG1141	4713	6171	1449	0.343643
COG1140	1270	252	525	0.0886				COG1142	1710	1319	422	0.381798
COG1141	3700	3598	1805	0.956325				COG1143	11410	10310	2120	0.617879
COG1142	1217	750	277	0.130247				COG1144	750	634	149	0.457808
COG1143	11040	12480	1649	0.407887				COG1145	6.6	0.6	4.17	0.188512
COG1144	634	724	143	0.548115				COG1146	245	253	76.7	0.923495
COG1145	0.8	2	0.583	0.073522				COG1148	3584	1353	926	0.042483
COG1146	234	173	61.4	0.347895				COG1149	19470	19570	4633	0.98331
COG1148	4036	6792	2201	0.245847				COG1150	3161	1058	980	0.064208
COG1149	18420	24100	2646	0.064094				COG1151	16960	15310	3781	0.674086
COG1150	3609	6697	2189	0.196034				COG1152	2862	880	926	0.064814
COG1151	17930	21440	2635	0.219493				COG1154	15250	13210	1023	0.081171
COG1152	3402	5414	1885	0.31702				COG1155	10470	8751	2050	0.426118
COG1154	14470	15100	1701	0.720751				COG1156	10810	9077	2136	0.440736
COG1155	10290	12390	1378	0.166154				COG1157	3227	5257	1499	0.212661
COG1156	10780	12590	1494	0.260343				COG1158	7070	4034	1303	0.048219
COG1157	2511	3160	1400	0.655208				COG1159	15440	13440	1128	0.114151
COG1158	8162	9007	2507	0.744771				COG1160	22210	17060	2495	0.072912
COG1159	14730	14820	1660	0.958086				COG1161	18700	16490	1672	0.222888
COG1160	22620	23650	4121	0.808916				COG1162	15400	13440	1018	0.090378
COG1161	17650	15780	2088	0.396703				COG1164	11650	11600	994	0.961134
COG1162	14680	14720	1704	0.981848				COG1165	621	395	217	0.329327
COG1164	11690	8247	1657	0.071296				COG1166	347	382	186	0.855992
COG1165	588	1427	473	0.113899				COG1167	29620	28310	4300	0.768418
COG1166	248	219	72.4	0.701269				COG1168	12880	11750	1409	0.445672
COG1167	29020	26380	2512	0.323915				COG1169	198	251	181	0.779059
COG1168	12540	12970	1385	0.764206				COG1171	15490	14510	3829	0.804462
COG1169	82.6	179	52.6	0.10298				COG1172	51260	30970	11998	0.129281
COG1171	15410	19130	2711	0.207198				COG1173	32200	28570	5046	0.492379
COG1172	54240	70690	17613	0.377649				COG1174	5395	7304	1425	0.217227
COG1173	30470	35820	4299	0.248594				COG1175	110400	71270	20873	0.097705
COG1174	5552	3539	1357	0.17614				COG1176	17360	13690	2030	0.108241
COG1175	108300	120800	24028	0.616987				COG1177	17150	13610	2034	0.11993
COG1176	17120	18910	3215	0.592937				COG1178	2815	2463	429	0.435796
COG1177	17020	18850	3245	0.588297				COG1179	11170	9665	2128	0.499576
COG1178	2237	1530	783	0.392801				COG1180	29780	23440	5906	0.314348
COG1179	10750	12410	1509	0.303424				COG1181	22030	19830	2708	0.44009
COG1180	28700	32280	5217	0.511971				COG1182	3219	5108	1543	0.255736
COG1181	21020	23820	2799	0.346474				COG1183	9011	8210	1953	0.692483
COG1182	2988	2814	1625	0.917375				COG1184	143	78.4	46.3	0.197975
COG1183	9069	11530	1369	0.109864				COG1185	11900	10150	2276	0.463959
COG1184	188	180	77.6	0.920382				COG1186	15220	13430	894	0.080336
COG1185	11900	12670	1783	0.677283				COG1187	29920	25950	2461	0.145393
COG1186	14720	14800	1669	0.962954				COG1188	14030	12460	1144	0.207289
COG1187	28910	29940	4078	0.806964				COG1189	14540	12730	1089	0.134935
COG1188	13380	14430	1818	0.579388				COG1190	15260	13360	1167	0.142086
COG1189	13820	13070	1463	0.622006				COG1191	65240	57060	14376	0.584958
COG1190	14400	14790	1780	0.832021				COG1192	52840	42990	7937	0.249769
COG1191	63390	77340	9694	0.188095				COG1193	17340	15140	1614	0.210096
COG1192	50750	61930	9307	0.264009				COG1194	10780	9425	2135	0.543303
COG1193	15740	16760	2325	0.672458				COG1195	15220	13520	1042	0.141575
COG1194	11070	12140	1755	0.559089				COG1196	47970	42300	4834	0.274567
COG1195	14750	14840	1649	0.957807				COG1197	15620	13370	1166	0.089778
COG1196	46220	47370	3442	0.746902				COG1198	14870	13060	1005	0.109444
COG1197	15270	14980	1981	0.88725				COG1199	17290	17590	1679	0.862672
COG1198	14280	14680	1731	0.823032				COG1200	14930	13100	1024	0.111812
COG1199	15930	16300	1249	0.774514				COG1201	1991	1207	809	0.361092
COG1200	14340	14700	1704	0.837954				COG1202	3	1.2	1.24	0.185009
COG1201	1801	2237	876	0.632064				COG1203	10590	9158	1779	0.444186
COG1202	3.6	0.6	1.31	0.051468				COG1204	2890	883	948	0.06722
COG1203	10960	12400	1366	0.322718				COG1205	537	247	129	0.054776
COG1204	3387	5401	1877	0.314522				COG1206	8326	9083	455	0.134979
COG1205	267	365	124	0.448622				COG1207	14590	13120	1100	0.218086
COG1206	6166	6090	999	0.94121				COG1208	7877	8000	1395	0.931901
COG1207	14020	13630	1656	0.819756				COG1209	28720	17030	6553	0.112291
COG1208	5747	6879	1554	0.486982				COG1210	8996	10190	595	0.079546
COG1209	32540	40500	10396	0.465866				COG1211	11410	9951	2147	0.51603
COG1210	6991	6260	811	0.393653				COG1212	1002	725	214	0.233081
COG1211	11230	12600	1592	0.414432				COG1213	569	390	214	0.425653
COG1212	527	1503	429	0.052349				COG1214	15060	13200	1164	0.148875
COG1213	517	202	270	0.275567				COG1215	27190	25450	916	0.0941
COG1214	14360	14740	1629	0.821455				COG1216	34800	24920	5521	0.111295
COG1215	25190	24670	1702	0.767767				COG1217	14780	13020	1086	0.143807
COG1216	35420	42660	7594	0.368319				COG1218	523	539	183	0.93252
COG1217	14620	14650	2069	0.988784				COG1219	20250	15860	2377	0.101982
COG1218	395	1367	407	0.043804				COG1220	2791	2600	1219	0.879341
COG1219	20830	21670	3864	0.833358				COG1221	393	330	173	0.726762
COG1220	2003	2111	924	0.90987				COG1222	4	3.4	1.94	0.764888
COG1221	339	324	101	0.885992				COG1225	14810	11050	2939	0.236661
COG1222	7.2	2.2	4.26	0.274659				COG1226	13.2	18.4	7.05	0.481761
COG1225	14410	24000	4603	0.070714				COG1227	13460	12070	958	0.185042
COG1226	6.8	3.6	2.7	0.270239				COG1228	11480	10120	2013	0.518309
COG1227	13630	12970	1550	0.681523				COG1230	3951	3657	1589	0.857837
COG1228	11140	12870	1514	0.286156				COG1231	124	128	111	0.973564
COG1230	3162	3480	1434	0.830043				COG1232	898	720	152	0.275697
COG1231	27.6	16.2	17.4	0.531553				COG1233	1171	796	233	0.146367
COG1232	612	620	117	0.943371				COG1234	17650	13750	2078	0.097447
COG1233	1141	632	172	0.018163				COG1235	15860	13210	1180	0.054929
COG1234	19020	20670	3894	0.682895				COG1236	8351	7586	1733	0.670619
COG1235	14910	15080	1519	0.91364				COG1237	2879	4917	1445	0.196003
COG1236	8938	9891	1196	0.448525				COG1238	370	154	118	0.103635
COG1237	2395	2963	1478	0.710753				COG1239	214	222	80.6	0.921425
COG1238	250	1294	385	0.026654				COG1240	1726	898	317	0.03083
COG1239	203	140	69.2	0.387691				COG1241	30.2	59	15.1	0.093207
COG1240	1400	3213	790	0.050914				COG1242	8070	4856	1834	0.117867
COG1241	16	80.8	52.9	0.255812				COG1243	1391	882	260	0.086476
COG1242	8476	9976	2600	0.579843				COG1244	97.6	45.6	61.8	0.424893
COG1243	897	594	220	0.205604				COG1245	246	167	75.8	0.325784
COG1244	73.4	46.4	56.9	0.647641				COG1246	9700	9098	2181	0.789502
COG1245	245	124	103	0.272865				COG1247	23030	20770	2431	0.379752
COG1246	10670	10710	1642	0.981161				COG1249	19310	15960	1542	0.061554
COG1247	22660	21920	1832	0.69691				COG1250	10600	14980	2288	0.091869
COG1249	20050	17950	2628	0.447382				COG1251	6710	7438	1529	0.646749
COG1250	9673	7803	2926	0.54066				COG1252	4711	4282	1422	0.770626
COG1251	4821	4857	1827	0.984758				COG1253	25530	20210	2348	0.053204
COG1252	4081	3744	1288	0.800205				COG1254	11880	11060	782	0.325059
COG1253	23540	26350	4611	0.559134				COG1256	4996	6280	1398	0.385306
COG1254	12100	12000	1760	0.956084				COG1257	3775	3440	1424	0.819896
COG1256	5483	4198	1544	0.429381				COG1259	742	527	171	0.244789
COG1257	3438	2206	1030	0.265906				COG1260	170	59	48.9	0.053546
COG1259	644	182	134	0.008944				COG1261	270	388	187	0.544617
COG1260	98.8	128	23.8	0.259961				COG1262	1554	749	578	0.201339
COG1261	224	152	65.5	0.299939				COG1263	43520	41340	2620	0.429446
COG1262	2018	1593	1235	0.739602				COG1264	4773	6651	1624	0.280879
COG1263	39040	40890	5826	0.758946				COG1266	7467	5215	825	0.025866
COG1264	4212	3687	1741	0.770731				COG1267	2557	3199	1219	0.612833
COG1266	8069	6446	1465	0.300205				COG1268	15000	11360	2596	0.198464
COG1267	1726	432	626	0.072506				COG1269	10920	9138	2158	0.43289
COG1268	15760	16850	2803	0.707479				COG1270	9706	8791	1433	0.540937
COG1269	10870	12660	1511	0.270017				COG1271	4477	4199	1431	0.850858
COG1270	10380	10510	1107	0.909376				COG1272	13990	12310	927	0.107384
COG1271	3479	3783	1394	0.832784				COG1273	460	343	102	0.284129
COG1272	13570	12880	1460	0.649021				COG1274	959	428	273	0.088111
COG1273	284	83.8	87.8	0.05191				COG1275	721	334	195	0.081979
COG1274	567	338	243	0.375132				COG1276	59.6	181	176	0.50976
COG1275	404	487	146	0.587175				COG1277	5943	7014	1380	0.459903
COG1276	8.4	82.6	38.2	0.087735				COG1278	16110	14830	772	0.135769
COG1277	6292	4403	1736	0.308105				COG1279	136	270	180	0.479413
COG1278	15760	15350	2003	0.842931				COG1280	1008	1513	1058	0.645801
COG1279	111	138	62.3	0.671895				COG1281	14500	12850	1130	0.18238
COG1280	600	1958	563	0.042431				COG1282	454	310	189	0.465927
COG1281	13940	13310	1358	0.655105				COG1283	19120	17000	4010	0.611341
COG1282	184	284	60.5	0.137776				COG1284	38750	33180	5421	0.334221
COG1283	19870	22450	2792	0.382504				COG1285	9431	10430	401	0.037548
COG1284	36740	42090	6305	0.420829				COG1286	961	708	291	0.409654
COG1285	6831	7950	687	0.142062				COG1287	585	371	156	0.207313
COG1286	1413	1473	486	0.904776				COG1288	9591	7969	1713	0.371548
COG1287	323	383	111	0.601708				COG1289	4517	2879	1253	0.227585
COG1288	8333	6914	2191	0.535441				COG1290	208	220	79.9	0.882421
COG1289	4305	6596	2244	0.337252				COG1291	5887	5868	1542	0.990468
COG1290	204	129	71.1	0.321144				COG1292	1599	1828	544	0.684914
COG1291	5664	8426	1032	0.028112				COG1293	13950	12390	1104	0.195207
COG1292	901	1158	244	0.323143				COG1294	4445	4139	1428	0.83572
COG1293	13590	13190	1345	0.773663				COG1295	13330	12220	885	0.245092
COG1294	3463	3701	1437	0.872559				COG1296	13380	11730	1496	0.302035
COG1295	13140	13760	1643	0.715713				COG1297	6188	6088	1584	0.951221
COG1296	13580	11490	1063	0.084746				COG1298	3042	5027	1379	0.188121
COG1297	5586	9645	1360	0.017457				COG1299	14110	12880	1506	0.437858
COG1298	2628	3048	1421	0.775065				COG1300	419	283	102	0.216601
COG1299	12920	13300	1785	0.836738				COG1301	18310	17740	2582	0.830835
COG1300	283	382	119	0.427227				COG1302	29060	25860	1690	0.094939
COG1301	17310	20930	2278	0.150645				COG1304	10770	12860	2154	0.360224
COG1302	28440	26320	3083	0.511087				COG1305	15770	11340	2958	0.172627
COG1304	8218	7617	845	0.497095				COG1306	959	615	231	0.175293
COG1305	15460	19250	3293	0.283064				COG1307	54550	50470	5090	0.445915
COG1306	861	764	438	0.830822				COG1308	42.4	55.6	19.3	0.512331
COG1307	53310	51160	5516	0.706893				COG1309	110700	107500	15438	0.840972
COG1308	57.8	32	29.8	0.411385				COG1310	4495	2435	1225	0.131183
COG1309	106400	106300	9431	0.9918				COG1312	4567	5336	1384	0.593675
COG1310	5873	6697	2073	0.701343				COG1313	9165	8223	1846	0.623676
COG1312	3784	4846	1335	0.449195				COG1314	8627	9715	371	0.019036
COG1313	9152	9775	1166	0.607755				COG1315	2925	4773	1320	0.19913
COG1314	6893	7286	609	0.537087				COG1316	35440	29860	2660	0.069218
COG1315	2497	2961	1476	0.76135				COG1317	3234	4917	1347	0.246749
COG1316	34580	30840	4411	0.421188				COG1319	12410	9703	2735	0.351345
COG1317	2490	3126	1487	0.680172				COG1320	144	234	46.6	0.087415
COG1319	13140	16010	2892	0.350067				COG1321	28600	28110	6224	0.939183
COG1320	90.6	159	60.5	0.291192				COG1322	2596	1731	519	0.133869
COG1321	26920	32040	3823	0.217323				COG1323	13790	12250	1186	0.230367
COG1322	2276	2276	657	>0.999999				COG1324	265	399	176	0.467123
COG1323	13320	13150	1581	0.917033				COG1327	14270	12700	879	0.111978
COG1324	205	209	56.7	0.940032				COG1328	23440	20810	2805	0.375913
COG1327	13750	13130	1388	0.666973				COG1329	6866	7677	1546	0.614162
COG1328	21860	24260	2949	0.43927				COG1330	60.2	182	176	0.510949
COG1329	6571	5181	1653	0.424879				COG1331	1654	1160	341	0.185284
COG1330	9.2	84	38.4	0.087417				COG1332	2760	849	995	0.090918
COG1331	1212	2236	484	0.067217				COG1333	212	211	75.5	0.991803
COG1332	3158	5405	1930	0.277901				COG1334	524	280	196	0.247362
COG1333	201	55.6	54.9	0.029197				COG1335	18210	17890	2380	0.896379
COG1334	529	326	331	0.556745				COG1336	10	5.2	3.89	0.252369
COG1335	18440	17100	1247	0.313994				COG1337	3318	1315	1109	0.108582
COG1336	6	7	1.55	0.536635				COG1338	3170	5083	1392	0.206766
COG1337	3642	5959	1951	0.269025				COG1341	12.2	17	6.87	0.504398
COG1338	2652	3080	1429	0.772231				COG1342	7742	6796	1703	0.593645
COG1341	6.6	3.4	2.59	0.252081				COG1343	6257	3083	1476	0.063792
COG1342	8328	9542	1254	0.361277				COG1344	11770	14150	2815	0.422482
COG1343	7415	7733	2001	0.877688				COG1345	4911	6192	1411	0.390432
COG1344	12750	9180	3301	0.311065				COG1346	11370	9887	1760	0.423925
COG1345	5554	4164	1569	0.401582				COG1347	453	337	221	0.614866
COG1346	11800	12000	1384	0.888658				COG1348	8482	7422	1664	0.541818
COG1347	288	1418	426	0.029205				COG1349	33850	30140	5600	0.526256
COG1348	9192	10330	1241	0.386067				COG1350	1871	1140	313	0.047946
COG1349	30930	36150	5462	0.367229				COG1351	2449	1414	386	0.027971
COG1350	1566	2026	613	0.474667				COG1352	4180	5750	1336	0.2738
COG1351	2027	1165	310	0.023987				COG1353	3216	1228	1087	0.104848
COG1352	3859	3666	1693	0.912028				COG1354	14980	13080	1149	0.136676
COG1353	3557	5826	1998	0.28909				COG1355	212	218	79.3	0.941511
COG1354	14420	13430	1351	0.484676				COG1357	7008	7973	1433	0.519681
COG1355	198	127	70.5	0.344806				COG1358	13160	11980	1020	0.280595
COG1357	5181	6195	1349	0.473738				COG1359	1804	1605	482	0.690409
COG1358	12920	12790	1545	0.935013				COG1360	4453	5976	1405	0.309881
COG1359	1515	550	494	0.086366				COG1361	583	214	176	0.068423
COG1360	3139	4738	1387	0.282258				COG1362	19470	17360	4174	0.626854
COG1361	274	284	115	0.931216				COG1363	14630	15560	2499	0.719441
COG1362	19600	21380	2783	0.540261				COG1364	9952	8932	1939	0.613119
COG1363	12090	13130	1939	0.606339				COG1366	13710	10390	2552	0.229463
COG1364	10120	10650	1232	0.678385				COG1367	4.2	1.4	4.24	0.527797
COG1366	14260	16620	2706	0.408574				COG1368	26370	24290	1594	0.22829
COG1367	0.2	0.2	0.283	>0.999999				COG1371	30.2	59.2	15.1	0.091869
COG1368	27550	25550	3326	0.564277				COG1372	1	0	0.548	0.105383
COG1371	16.4	81	52.8	0.256208				COG1373	31420	21940	4392	0.062962
COG1372	1.4	2.4	1.23	0.44078				COG1376	15440	14020	976	0.183659
COG1373	34120	34100	6841	0.997739				COG1377	3084	5079	1512	0.223529
COG1376	15640	14230	1821	0.461139				COG1378	888	569	193	0.137074
COG1377	2383	3076	1420	0.638612				COG1379	3726	1308	1020	0.045167
COG1378	734	921	177	0.322169				COG1380	11160	9787	1765	0.458992
COG1379	3818	5920	1886	0.297524				COG1381	15390	13260	1154	0.102078
COG1380	11570	11960	1333	0.777325				COG1384	138	40.8	122	0.44797
COG1381	14570	14670	1687	0.954187				COG1385	12470	10670	1803	0.347266
COG1384	270	9.8	244	0.318262				COG1386	14810	12980	1062	0.123032
COG1385	12850	12620	1239	0.857389				COG1387	24550	19670	4805	0.339563
COG1386	14380	13380	1351	0.480454				COG1388	7636	7021	1784	0.739146
COG1387	24620	27880	3904	0.427891				COG1390	9476	8406	2044	0.61491
COG1388	8374	9748	1268	0.310207				COG1391	63.6	185	177	0.514121
COG1390	9592	10650	1272	0.429535				COG1392	2710	2522	980	0.852637
COG1391	16	85.2	38.3	0.108303				COG1393	23360	18300	2394	0.067471
COG1392	1171	746	175	0.04138				COG1394	10640	8949	2103	0.444677
COG1393	23770	24800	5721	0.861611				COG1395	401	338	153	0.690746
COG1394	10590	12500	1447	0.223343				COG1396	77140	75490	15794	0.919367
COG1395	200	137	44.3	0.189215				COG1397	8998	8433	1479	0.71247
COG1396	74130	75690	10145	0.881604				COG1398	176	160	76.8	0.840119
COG1397	7720	9689	917	0.063999				COG1399	14340	12660	908	0.101405
COG1398	189	47.4	55.7	0.034826				COG1401	1596	1028	544	0.326655
COG1399	13760	14410	1892	0.740013				COG1402	6676	6245	1716	0.808012
COG1401	1792	816	523	0.099245				COG1403	2450	2130	524	0.558484
COG1402	6210	9129	1202	0.041311				COG1404	18780	16760	4060	0.632178
COG1403	2213	1180	431	0.043529				COG1405	30.2	59	15.1	0.093207
COG1404	20400	22270	3420	0.599457				COG1406	708	449	241	0.314103
COG1405	16	80.8	52.9	0.255812				COG1407	31.8	59	15.1	0.110313
COG1406	967	378	537	0.30471				COG1408	18820	12720	4155	0.180219
COG1407	16.4	82	53.1	0.25163				COG1409	11130	9803	1137	0.27688
COG1408	20060	25200	5317	0.362013				COG1410	14900	10850	3019	0.216616
COG1409	9240	14030	1914	0.036819				COG1413	1176	797	216	0.116795
COG1410	14750	18730	3218	0.251173				COG1414	8492	8418	2067	0.972312
COG1413	1070	765	287	0.31889				COG1415	121	30.2	121	0.475166
COG1414	6948	9900	1122	0.030122				COG1416	60.4	32.4	17.3	0.143989
COG1415	260	5	242	0.322215				COG1418	30630	26980	1870	0.08669
COG1416	31.6	19.8	8.7	0.212054				COG1419	1006	810	208	0.372394
COG1418	29460	28080	2886	0.64527				COG1420	14550	12760	1216	0.179106
COG1419	1139	566	334	0.125079				COG1421	1.8	0.2	0.825	0.088327
COG1420	13950	13280	1485	0.663844				COG1424	2.2	0.2	1.33	0.172294
COG1421	1.4	2.4	1.23	0.44078				COG1426	7533	6209	1195	0.299952
COG1424	0.4	0.6	0.346	0.579569				COG1427	248	96.4	82.1	0.101563
COG1426	6191	4041	739	0.01956				COG1428	8034	7197	3070	0.792044
COG1427	185	1201	374	0.02633				COG1429	1294	707	202	0.019847
COG1428	6211	5724	2526	0.851909				COG1430	331	263	138	0.634486
COG1429	895	1878	349	0.022537				COG1431	34.4	18.8	14.1	0.301011
COG1430	463	133	238	0.20326				COG1432	2498	1511	291	0.009462
COG1431	15.8	24.4	4.88	0.115957				COG1433	7905	11490	2781	0.233421
COG1432	2115	2567	591	0.466388				COG1434	18680	14190	2486	0.108499
COG1433	6293	6917	3070	0.843989				COG1435	7409	8722	529	0.037897
COG1434	18070	21000	3986	0.483291				COG1436	10210	8761	2131	0.5158
COG1435	6185	6599	468	0.402616				COG1437	299	247	259	0.846896
COG1436	10170	11140	1359	0.495683				COG1438	13330	11670	1664	0.347688
COG1437	294	90	260	0.455042				COG1439	404	135	117	0.050792
COG1438	14700	11440	1577	0.072579				COG1440	10230	10800	891	0.540096
COG1439	171	202	81.3	0.71129				COG1441	59	181	176	0.507306
COG1440	8134	7085	1482	0.499069				COG1442	8105	5102	2416	0.249002
COG1441	8	82.6	38.2	0.086454				COG1443	5399	3235	1231	0.116791
COG1442	9509	7656	2949	0.547301				COG1444	2177	1375	812	0.352512
COG1443	6324	6904	2058	0.785193				COG1445	2341	2136	606	0.743881
COG1444	1794	2616	981	0.426478				COG1446	396	334	171	0.723219
COG1445	2269	1446	743	0.300022				COG1447	10440	11550	879	0.242143
COG1446	291	324	121	0.792406				COG1448	351	485	354	0.713473
COG1447	8234	6792	1724	0.427118				COG1449	692	387	159	0.091039
COG1448	282	415	141	0.374167				COG1450	449	444	186	0.975841
COG1449	710	1422	419	0.127506				COG1451	10990	9496	2027	0.482115
COG1450	499	248	230	0.307755				COG1452	820	595	225	0.346327
COG1451	10660	12280	1345	0.262818				COG1453	13310	10670	2402	0.303782
COG1452	751	1551	457	0.118392				COG1454	47220	44300	6662	0.672755
COG1453	11990	13620	1614	0.342192				COG1455	26010	23270	6196	0.670054
COG1454	44730	48710	4280	0.379606				COG1456	2759	868	994	0.093555
COG1455	20850	21380	5920	0.930859				COG1457	6097	7994	1246	0.166407
COG1456	3127	5395	1931	0.27386				COG1459	10360	11190	550	0.169391
COG1457	5428	4004	1509	0.373076				COG1461	15360	12950	1289	0.098424
COG1459	8790	6940	822	0.054599				COG1462	63.6	181	176	0.523242
COG1461	14290	13750	1667	0.754312				COG1463	806	697	246	0.671158
COG1462	8.2	83	38.2	0.085902				COG1464	17120	15370	1148	0.165788
COG1463	634	1552	394	0.048136				COG1465	2.2	0.4	0.775	0.048614
COG1464	16970	15500	2273	0.535929				COG1466	15240	13210	1053	0.090085
COG1465	0.2	0.6	0.316	0.241488				COG1468	3074	1886	507	0.047334
COG1466	14530	14700	1645	0.920256				COG1469	156	91.6	124	0.616804
COG1468	4034	2113	541	0.007497				COG1470	35.8	18.8	14	0.257952
COG1469	279	92.6	262	0.496581				COG1472	47400	35470	9391	0.239656
COG1470	16.2	26	4.73	0.07185				COG1473	28240	29360	5293	0.837716
COG1472	50940	55390	9569	0.654291				COG1474	237	187	72.6	0.504104
COG1473	25940	31770	2274	0.033455				COG1475	57290	48520	7960	0.302581
COG1474	243	123	104	0.279173				COG1476	91580	89500	16707	0.903994
COG1475	55300	64200	7469	0.267569				COG1477	21760	19560	2723	0.442418
COG1476	88420	88810	11207	0.973091				COG1478	1757	759	909	0.304006
COG1477	22710	23940	3093	0.701242				COG1479	2260	2513	755	0.746128
COG1478	1526	2196	860	0.458173				COG1480	3250	4888	1248	0.225602
COG1479	1098	700	218	0.104797				COG1481	14650	12840	1206	0.171858
COG1480	2732	4223	1127	0.222559				COG1482	17110	14400	1116	0.041315
COG1481	13960	13300	1519	0.675386				COG1483	13.4	9.6	5.93	0.539404
COG1482	15430	15260	1551	0.915441				COG1484	49890	54380	7927	0.586621
COG1483	11.6	4.8	4.71	0.186941				COG1485	59.2	181	176	0.508133
COG1484	46270	48680	5248	0.658283				COG1486	9177	9751	712	0.44321
COG1485	8.6	82.8	38.2	0.087688				COG1487	517	519	233	0.994026
COG1486	6257	6172	1041	0.936954				COG1488	16210	14370	860	0.064841
COG1487	461	274	78.8	0.04548				COG1489	9338	8531	1933	0.687342
COG1488	15750	13780	1278	0.161824				COG1490	14390	12720	1012	0.137601
COG1489	9185	10290	1218	0.390639				COG1492	9712	8791	1433	0.538456
COG1490	13750	14450	1842	0.713848				COG1493	14270	12500	1218	0.184376
COG1492	10380	10510	1107	0.909403				COG1494	270	475	172	0.268143
COG1493	13760	13170	1317	0.665961				COG1495	61.2	181	176	0.513858
COG1494	206	162	64.4	0.515938				COG1496	9965	8934	1888	0.599938
COG1495	9.4	84.6	38.3	0.08547				COG1499	3.8	0.2	3.56	0.341631
COG1496	10180	10800	1305	0.64748				COG1501	23650	16790	3928	0.118847
COG1499	3.2	0	1.39	0.050643				COG1502	32730	26490	3242	0.090475
COG1501	23600	29370	6559	0.404685				COG1503	87.2	92.2	49	0.921196
COG1502	33960	34680	5200	0.893291				COG1504	4.4	0	4.4	0.346607
COG1503	75.6	111	86.5	0.689847				COG1505	262	101	82.8	0.088105
COG1505	196	1219	379	0.027247				COG1506	7237	7837	1507	0.700955
COG1506	5253	10020	873	0.000601				COG1507	3.8	3.2	2.07	0.779166
COG1507	7.2	1.6	4.04	0.20283				COG1508	3390	5012	1446	0.294497
COG1508	2936	4243	1140	0.284688				COG1509	505	609	183	0.587418
COG1509	569	305	273	0.361358				COG1510	0.4	0.4	0.346	>0.999999
COG1510	0.6	0.6	0.469	>0.999999				COG1511	24450	21720	3002	0.389677
COG1511	25550	22300	2809	0.280627				COG1512	11480	9511	1992	0.351945
COG1512	11930	14050	1945	0.307388				COG1513	0.6	0	0.4	0.171992
COG1514	537	486	109	0.648605				COG1514	866	711	151	0.333272
COG1515	21.2	83.8	38	0.138209				COG1515	60.8	182	176	0.510299
COG1516	5288	4072	1575	0.462147				COG1516	4766	6023	1400	0.39547
COG1518	10620	11960	2951	0.661845				COG1518	10950	7382	1877	0.093908
COG1519	432	1424	426	0.048401				COG1519	599	478	223	0.600518
COG1520	1437	2198	598	0.239223				COG1520	1632	1118	318	0.144449
COG1521	11250	12670	1457	0.358351				COG1521	11730	9838	2097	0.39328
COG1522	17160	21330	2117	0.084403				COG1522	18110	16580	3283	0.653604
COG1523	14890	12540	2206	0.317803				COG1523	13060	10980	2559	0.439842
COG1524	1554	1570	623	0.980148				COG1524	1676	1402	352	0.458302
COG1525	469	221	101	0.039327				COG1525	465	462	105	0.976542
COG1526	3349	5503	1986	0.309777				COG1526	3002	1147	941	0.084292
COG1527	9879	11110	1207	0.337546				COG1527	10100	8589	2066	0.485461
COG1528	3331	5029	1324	0.235716				COG1528	4947	6194	1459	0.417692
COG1529	23300	32270	4931	0.106378				COG1529	22910	20560	5730	0.692504
COG1530	7256	8843	2548	0.550724				COG1530	6280	3688	1394	0.099922
COG1532	4.4	10.8	4.11	0.158141				COG1532	5.8	23.8	17.2	0.327194
COG1533	12760	15090	1676	0.201866				COG1533	13250	13760	3041	0.870985
COG1534	11800	11240	1372	0.69384				COG1534	11550	10350	1865	0.538009
COG1535	8	82.6	38.2	0.086454				COG1535	59	181	176	0.508082
COG1536	2926	3100	1522	0.911788				COG1536	3332	5126	1377	0.228902
COG1538	4597	15360	4315	0.037273				COG1538	6002	3688	1537	0.170605
COG1539	2851	2075	487	0.150091				COG1539	2667	2235	468	0.382982
COG1540	3663	5697	2000	0.338935				COG1540	3262	1335	952	0.077496
COG1541	14870	18350	3136	0.299435				COG1541	14980	11050	2807	0.199104
COG1543	274	9.8	243	0.309009				COG1543	140	50.4	121	0.479783
COG1544	14260	14740	1760	0.792008				COG1544	14900	13220	950	0.114864
COG1545	48.2	109	58.5	0.327386				COG1545	82.6	75.4	26.9	0.795792
COG1546	8676	9409	2405	0.768352				COG1546	8425	5068	1651	0.076446
COG1547	2.8	1	1.11	0.144615				COG1547	0.8	0.8	0.529	>0.999999
COG1550	260	307	114	0.692022				COG1550	400	226	81.1	0.063571
COG1551	5171	3989	1580	0.475758				COG1551	4524	5814	1432	0.394059
COG1552	2.2	0	2.2	0.346561				COG1552	1.6	5	2.56	0.220961
COG1552	2.2	0	2.2	0.346561				COG1553	119	362	352	0.51008
COG1553	18	168	76.8	0.086475				COG1554	6115	5180	1515	0.554388
COG1554	4999	4608	1590	0.811997				COG1555	14490	12870	1077	0.171115
COG1555	13950	14630	1856	0.723553				COG1556	1234	1250	413	0.970073
COG1556	1249	323	478	0.088781				COG1558	3171	5083	1392	0.206899
COG1558	2652	3080	1429	0.772193				COG1559	11200	9754	2115	0.513397
COG1559	11200	12090	1692	0.613235				COG1560	1644	1666	519	0.967223
COG1560	891	1969	441	0.040326				COG1561	10000	8661	2005	0.523065
COG1561	9792	11880	1340	0.157703				COG1562	231	342	94.1	0.269016
COG1562	283	159	105	0.271571				COG1563	414	272	156	0.388437
COG1563	278	397	108	0.302158				COG1564	14060	12340	1079	0.149718
COG1564	13680	13190	1414	0.737808				COG1565	174	159	76.9	0.84624
COG1565	181	45.8	55.3	0.040073				COG1566	11450	14160	3413	0.450071
COG1566	9879	13780	1865	0.069875				COG1567	2934	1044	1058	0.111731
COG1567	3304	5512	1952	0.290778				COG1568	0.2	0	0.2	0.34658
COG1568	0	0.2	0.2	0.34658				COG1569	221	182	75.2	0.616128
COG1569	210	80.4	55.4	0.04742				COG1570	15920	14060	769	0.042017
COG1570	15450	14820	1648	0.712259				COG1571	63.2	78	29.4	0.627981
COG1571	34.8	94.4	53.7	0.299252				COG1572	227	159	47.3	0.191075
COG1572	222	287	108	0.564803				COG1573	7745	8123	763	0.63365
COG1573	7144	6350	775	0.335445				COG1574	6182	7528	1349	0.34751
COG1574	4975	4276	1485	0.650342				COG1575	6087	4798	1938	0.524622
COG1575	5413	5590	2193	0.937666				COG1576	15210	13390	1183	0.162492
COG1576	14380	14750	1809	0.843008				COG1577	8771	7433	3410	0.705033
COG1577	8126	6324	2948	0.557927				COG1578	159	120	29	0.216082
COG1578	125	78.4	23.5	0.08467				COG1579	1420	817	279	0.062547
COG1579	1310	2657	797	0.1296				COG1580	634	482	356	0.680504
COG1580	756	158	473	0.241323				COG1581	30.2	59	15.1	0.093207
COG1581	16	80.8	52.9	0.255812				COG1582	2920	4719	1326	0.211882
COG1582	2309	2944	1474	0.678003				COG1583	2934	930	1038	0.089732
COG1583	3352	5504	1891	0.288065				COG1584	195	256	198	0.765101
COG1584	29.8	98	40.8	0.133362				COG1585	9362	8365	1883	0.61078
COG1585	9376	10290	1154	0.451092				COG1586	3855	5712	1309	0.193616
COG1586	2690	3387	1622	0.678709				COG1587	1882	1673	434	0.643064
COG1587	1778	1801	660	0.973044				COG1589	11790	12090	474	0.5442
COG1589	10930	8020	866	0.009899				COG1591	0.6	0	0.245	0.039962
COG1591	0.2	0.6	0.316	0.241488				COG1592	26300	24510	5294	0.743981
COG1592	24300	28300	2893	0.204122				COG1593	19130	22420	5703	0.579912
COG1593	18520	23400	3426	0.192174				COG1595	140600	134600	30763	0.850226
COG1595	133300	171000	18196	0.072015				COG1596	1249	763	322	0.169827
COG1596	1029	2929	819	0.049032				COG1597	25110	19900	2281	0.051733
COG1597	24530	25510	4922	0.847162				COG1598	11180	5758	2654	0.075349
COG1598	13660	14130	4154	0.912712				COG1600	4570	6179	1534	0.324864
COG1600	3554	4823	1381	0.38492				COG1604	4.2	1.4	4.24	0.527797
COG1604	0.2	0.2	0.283	>0.999999				COG1605	1643	1553	405	0.829557
COG1605	1665	869	590	0.214115				COG1606	7752	7273	1810	0.797985
COG1606	8640	9766	1399	0.444047				COG1607	6492	3889	939	0.024255
COG1607	7692	7475	2201	0.923889				COG1609	120800	100500	9483	0.064701
COG1609	117600	110400	16346	0.671256				COG1610	10090	6885	1642	0.086742
COG1610	10630	10670	3092	0.989996				COG1611	5177	3123	738	0.023825
COG1611	5199	7330	2278	0.377017				COG1612	2.2	2.6	1.76	0.825987
COG1612	4.2	1.6	1.18	0.059255				COG1613	4310	2003	1198	0.090361
COG1613	5835	6437	2054	0.776908				COG1614	2722	855	981	0.093547
COG1614	3117	5381	1934	0.275471				COG1615	76	87.2	25.3	0.66972
COG1615	234	39.4	107	0.106127				COG1618	2095	4208	1342	0.153944
COG1618	1764	2625	1417	0.560163				COG1619	6658	7889	1138	0.310804
COG1619	6928	4253	1994	0.216575				COG1620	4260	4532	1826	0.885271
COG1620	2217	2365	974	0.882936				COG1621	29270	20550	4566	0.092593
COG1621	28500	35650	9181	0.458515				COG1622	269	399	175	0.480842
COG1622	207	212	55.9	0.93641				COG1623	641	536	142	0.481433
COG1623	447	368	128	0.555967				COG1624	14530	12690	1117	0.138093
COG1624	14060	14480	1543	0.792372				COG1625	8825	7701	1762	0.54145
COG1625	9036	10160	1349	0.428996				COG1626	224	244	190	0.9181
COG1626	307	116	242	0.453513				COG1629	9791	5508	2884	0.175878
COG1629	6077	24620	6800	0.025966				COG1633	3931	5354	1325	0.314186
COG1633	3010	3782	1326	0.576371				COG1635	21.4	9.6	9.23	0.23676
COG1635	10.2	20.4	4.43	0.050167				COG1636	10320	8901	2126	0.523319
COG1636	10690	10720	1616	0.985647				COG1637	3.8	3	1.96	0.693773
COG1637	7	1.6	4.12	0.226153				COG1638	16620	21630	5459	0.385551
COG1638	15680	18050	4628	0.622444				COG1639	517	426	182	0.629527
COG1639	654	180	225	0.068532				COG1640	19750	12980	4190	0.144813
COG1640	21670	24680	5375	0.590815				COG1641	8734	8302	1879	0.823971
COG1641	8975	9965	1196	0.43187				COG1643	600	602	385	0.996389
COG1643	758	251	456	0.298323				COG1645	1	0	0.548	0.105383
COG1645	1.4	2.4	1.23	0.44078				COG1646	0.6	0	0.4	0.171992
COG1646	0.4	0.2	0.447	0.666572				COG1647	1453	1308	423	0.740821
COG1647	1357	285	463	0.049227				COG1648	7027	4106	1027	0.0217
COG1648	8110	7437	2005	0.745817				COG1649	2768	1716	438	0.043214
COG1649	1723	2423	450	0.158242				COG1650	4.6	22.6	17.1	0.322897
COG1650	3.8	10.8	4.11	0.12683				COG1651	504	742	358	0.525055
COG1651	400	341	110	0.604004				COG1652	7496	7030	1616	0.780381
COG1652	8606	9193	1043	0.588868				COG1653	158500	103600	29158	0.096486
COG1653	156100	176500	35678	0.583176				COG1655	639	444	202	0.362432
COG1655	803	413	343	0.289094				COG1657	0.6	0.4	0.469	0.681047
COG1657	2.6	0.6	1.06	0.095463				COG1658	8337	9377	430	0.041778
COG1658	6559	5782	909	0.417522				COG1659	242	220	91	0.821713
COG1659	242	67.2	85.3	0.074492				COG1660	14450	12870	1015	0.158276
COG1660	13800	13380	1633	0.803465				COG1661	3573	1338	986	0.053094
COG1661	3703	5765	1850	0.297374				COG1662	887	2716	2641	0.508141
COG1662	129	1241	570	0.087083				COG1663	597	476	223	0.602334
COG1663	430	1420	424	0.048004				COG1664	1287	972	327	0.362702
COG1664	1583	654	763	0.258117				COG1666	565	539	272	0.92576
COG1666	445	193	154	0.140647				COG1668	8832	9596	492	0.158702
COG1668	8045	7533	891	0.581228				COG1669	4695	6240	1434	0.312561
COG1669	5294	3900	1657	0.424652				COG1670	39750	42470	5217	0.616261
COG1670	36210	36280	4064	0.986681				COG1671	9233	8156	1898	0.585925
COG1671	9323	10260	1143	0.436099				COG1672	3938	2173	872	0.077436
COG1672	4904	4542	1347	0.794959				COG1674	27520	22670	3901	0.248982
COG1674	27970	30750	4947	0.589523				COG1676	30.2	59	15.1	0.093207
COG1676	16	80.8	52.9	0.255812				COG1677	3170	5083	1392	0.206766
COG1677	2652	3080	1429	0.772231				COG1678	88.8	191	179	0.581684
COG1678	21.2	106	41.8	0.075746				COG1679	359	199	118	0.210398
COG1679	96.6	67.6	20.5	0.194879				COG1680	29270	25100	3400	0.254876
COG1680	26720	31710	5067	0.353564				COG1682	14570	11110	3144	0.303119
COG1682	14670	17150	3214	0.462539				COG1683	4388	5871	1431	0.330361
COG1683	3250	3570	1653	0.851364				COG1684	960	780	251	0.493283
COG1684	811	551	325	0.446397				COG1686	59810	45890	10209	0.209849
COG1686	61410	73220	13791	0.416707				COG1687	7191	7861	1129	0.569247
COG1687	7239	4815	1669	0.184457				COG1690	3444	5329	1464	0.233873
COG1690	2559	3492	1484	0.546986				COG1691	5565	3078	1388	0.110975
COG1691	6859	7289	2202	0.850048				COG1692	1483	1118	275	0.220871
COG1692	1191	809	246	0.159875				COG1694	5053	2633	928	0.031176
COG1694	5132	7497	2270	0.327959				COG1695	40570	45500	10149	0.640168
COG1695	36710	39770	8140	0.716755				COG1696	23770	20390	2903	0.277847
COG1696	22780	24550	2854	0.552364				COG1697	1.2	1.4	1.05	0.853541
COG1697	0.4	0	0.245	0.141099				COG1699	2773	4551	1328	0.217505
COG1699	2176	2846	1487	0.66427				COG1700	15.6	18.4	6.52	0.678927
COG1700	10.4	5	3.12	0.122183				COG1702	14790	13200	996	0.149033
COG1702	14260	14750	1765	0.788392				COG1703	472	291	125	0.186582
COG1703	387	1312	387	0.043974				COG1704	6910	5660	1128	0.299862
COG1704	6697	5710	1647	0.565474				COG1705	12640	11490	3969	0.779359
COG1705	11330	7098	3373	0.244962				COG1706	236	339	182	0.584993
COG1706	187	130	66.8	0.418352				COG1708	201	198	89.4	0.977513
COG1708	154	118	31.4	0.28236				COG1709	248	119	78.3	0.139126
COG1709	262	88	80.7	0.063286				COG1712	143	69.4	69.3	0.31929
COG1712	44.8	75.4	12.6	0.041074				COG1713	11940	11990	665	0.941935
COG1713	11080	7897	887	0.007091				COG1714	907	859	153	0.765242
COG1714	787	836	177	0.789645				COG1715	786	651	197	0.514132
COG1715	599	539	214	0.785422				COG1716	8304	4844	1311	0.029749
COG1716	9269	8230	2303	0.663908				COG1719	40.6	67.8	16.7	0.141174
COG1719	33.4	109	44.9	0.129756				COG1720	7364	7060	1805	0.870464
COG1720	6513	9291	1168	0.044723				COG1721	5349	3693	804	0.073344
COG1721	5210	4470	766	0.362597				COG1722	10300	11190	442	0.07897
COG1722	9851	7039	1020	0.024824				COG1724	546	404	81.3	0.118837
COG1724	672	284	173	0.054814				COG1725	39430	31970	5895	0.24129
COG1725	40390	42870	6394	0.708239				COG1726	415	318	215	0.662157
COG1726	250	1371	418	0.027944				COG1728	494	256	219	0.308314
COG1728	523	308	339	0.543556				COG1729	2046	1360	499	0.20613
COG1729	2414	2100	1088	0.780222				COG1732	2464	1964	492	0.33911
COG1732	2841	990	250	7.5e-05				COG1733	28120	24860	1276	0.033954
COG1733	26650	26210	3111	0.891031				COG1734	1163	960	368	0.595442
COG1734	954	1879	571	0.14367				COG1735	1560	1086	233	0.076233
COG1735	2444	986	671	0.061601				COG1737	40250	37300	5185	0.584974
COG1737	34480	38630	3426	0.260325				COG1738	525	606	207	0.707586
COG1738	504	295	234	0.398559				COG1739	14830	12990	1102	0.133434
COG1739	14220	14590	1679	0.831072				COG1740	506	515	228	0.970177
COG1740	450	185	88.8	0.017631				COG1741	1424	1315	508	0.835494
COG1741	882	1950	409	0.031044				COG1742	60	181	176	0.509993
COG1742	8.4	82.8	38.1	0.086384				COG1743	1	0.6	0.51	0.455362
COG1743	8.8	1.6	4.55	0.152046				COG1744	21220	21060	1202	0.897402
COG1744	17980	18660	987	0.51017				COG1747	125	31.6	124	0.474515
COG1747	264	5.4	245	0.321474				COG1748	8339	7533	1810	0.667932
COG1748	9005	11220	1526	0.184771				COG1749	927	848	205	0.709346
COG1749	1018	592	324	0.225347				COG1751	40.4	12.8	13.1	0.067904
COG1751	13.8	15.6	5.41	0.748051				COG1752	5427	6695	1415	0.39633
COG1752	4100	5589	1245	0.265842				COG1754	120	30	121	0.478982
COG1754	260	5	242	0.322235				COG1755	309	196	189	0.565654
COG1755	676	87.8	425	0.203886				COG1757	27320	27110	3378	0.951951
COG1757	26290	27850	1999	0.457672				COG1758	12930	12060	778	0.295831
COG1758	12870	12450	1247	0.744909				COG1760	23580	22000	1651	0.366612
COG1760	21830	23840	2929	0.511932				COG1762	12250	12300	2178	0.982246
COG1762	11920	8725	2357	0.212319				COG1763	4564	2595	677	0.019593
COG1763	4980	5964	1949	0.627199				COG1764	668	493	157	0.29614
COG1764	526	211	139	0.053222				COG1765	1894	1688	519	0.701999
COG1765	1931	1711	597	0.72201				COG1766	3170	5083	1392	0.206766
COG1766	2652	3080	1429	0.772231				COG1767	2646	2628	1062	0.986889
COG1767	1590	2113	882	0.569473				COG1768	6909	6471	1687	0.801707
COG1768	5820	8886	1011	0.016237				COG1769	4.2	1.4	4.24	0.527797
COG1769	0.2	0.2	0.283	>0.999999				COG1770	61	183	177	0.511066
COG1770	14.6	83.6	38.1	0.107733				COG1773	13590	9912	2781	0.22261
COG1773	13620	17730	3021	0.210773				COG1774	10820	9214	2098	0.46596
COG1774	10620	12250	1490	0.305838				COG1775	12120	12990	3096	0.785813
COG1775	11970	13330	1900	0.49451				COG1776	6165	7431	1543	0.435752
COG1776	5972	4696	1678	0.468884				COG1778	1135	852	262	0.311247
COG1778	896	1567	509	0.223416				COG1780	4517	3504	1069	0.370984
COG1780	5148	2812	1231	0.094419				COG1781	8267	7496	1788	0.677661
COG1781	8858	10920	1419	0.184265				COG1782	26.2	17.2	6.2	0.184772
COG1782	47.4	18.8	30.5	0.376239				COG1783	5999	7320	1233	0.31528
COG1783	4397	4037	1638	0.831541				COG1785	2483	4497	1411	0.191368
COG1785	2089	3802	1141	0.171735				COG1786	359	199	118	0.213273
COG1786	95.8	67	20.6	0.19918				COG1787	2978	1193	1057	0.129771
COG1787	3352	5541	1967	0.298051				COG1788	2370	4603	1425	0.155665
COG1788	2023	2634	1491	0.692622				COG1791	21.4	12.2	13	0.498533
COG1791	14.2	12.6	6.45	0.810385				COG1792	14340	12720	997	0.142978
COG1792	14060	14390	1791	0.85843				COG1793	460	461	97.7	0.992082
COG1793	255	170	68.1	0.244392				COG1794	6571	8109	730	0.068139
COG1794	5217	5056	959	0.870821				COG1796	18.2	18.6	8.45	0.963398
COG1796	7.4	3.8	2.57	0.198733				COG1797	9563	8751	1460	0.593395
COG1797	10280	10430	1137	0.89832				COG1799	14130	12500	1093	0.174317
COG1799	13570	13170	1596	0.808448				COG1801	1286	1264	530	0.967906
COG1801	1463	295	545	0.064504				COG1802	21130	22380	5033	0.810099
COG1802	21960	20440	3205	0.647943				COG1803	12070	10270	2504	0.492743
COG1803	12570	12350	1668	0.8983				COG1804	7175	4517	803	0.010728
COG1804	7595	6852	2101	0.732754				COG1805	416	318	215	0.661565
COG1805	252	1372	418	0.028094				COG1806	3096	2799	1119	0.797428
COG1806	2030	2160	918	0.890841				COG1807	9588	9656	1068	0.95081
COG1807	7520	11350	1247	0.015318				COG1808	601	383	155	0.197063
COG1808	500	1339	409	0.074061				COG1809	13.6	18.4	7.2	0.523953
COG1809	7	3.4	2.58	0.20055				COG1811	9634	9036	906	0.527769
COG1811	7852	10870	1099	0.025196				COG1813	13310	10960	2175	0.31137
COG1813	13420	16720	3083	0.315659				COG1814	3834	4132	1767	0.870263
COG1814	3321	567	1060	0.031741				COG1815	3170	5083	1392	0.206766
COG1815	2652	3080	1429	0.772231				COG1816	3708	3110	952	0.547486
COG1816	3097	2799	961	0.764391				COG1819	2546	4497	1335	0.181946
COG1819	2089	3080	1396	0.49799				COG1820	14400	12320	1446	0.188147
COG1820	13350	13810	1674	0.790488				COG1823	258	328	174	0.699793
COG1823	70.2	137	31.5	0.065826				COG1825	4711	2284	1037	0.047337
COG1825	4571	7450	2368	0.25876				COG1826	4137	5908	1729	0.335794
COG1826	3532	4365	1179	0.499858				COG1827	9197	8234	2103	0.659183
COG1827	9873	10380	1622	0.762558				COG1828	1303	1290	526	0.980888
COG1828	1476	322	544	0.066607				COG1830	473	424	227	0.83603
COG1830	349	334	93.3	0.882771				COG1832	828	689	259	0.606096
COG1832	1147	483	392	0.12834				COG1834	2282	2282	905	>0.999999
COG1834	1040	431	171	0.007437				COG1835	10440	6497	1596	0.038702
COG1835	11190	11730	3265	0.872747				COG1836	14.4	94.6	46.3	0.1218
COG1836	9.6	15.4	10.2	0.585587				COG1837	11980	10460	1768	0.415058
COG1837	12450	11220	1255	0.355929				COG1838	14200	10760	3003	0.285118
COG1838	15650	17210	3086	0.626778				COG1840	5747	7580	1672	0.304922
COG1839	0.2	0.4	0.316	0.544723				COG1841	14670	12960	945	0.107886
COG1840	4412	4493	1782	0.96485				COG1842	845	685	246	0.536362
COG1841	14030	14450	1678	0.808715				COG1843	3320	5172	1373	0.214222
COG1842	714	518	143	0.209596				COG1845	264	399	176	0.465759
COG1843	2928	3165	1567	0.883534				COG1846	83710	83530	13406	0.989616
COG1845	206	209	56.4	0.953442				COG1847	11540	10080	1727	0.42243
COG1846	80900	81610	8603	0.936254				COG1848	504	510	124	0.965197
COG1847	12180	11130	1248	0.424661				COG1850	230	174	74.4	0.471629
COG1848	585	251	143	0.047402				COG1851	25	15.8	6.23	0.178151
COG1850	212	72	55.9	0.036987				COG1852	252	201	54.8	0.379351
COG1851	46.2	16.6	30.6	0.361679				COG1853	27340	21190	5291	0.278631
COG1852	231	307	109	0.504172				COG1854	11590	9790	1343	0.216911
COG1853	27600	31760	4777	0.409238				COG1855	13.2	9.4	5.88	0.536423
COG1854	12610	12490	1656	0.944008				COG1857	59	50.8	22.6	0.725911
COG1855	5.6	4.2	1.45	0.36232				COG1858	480	323	119	0.223748
COG1856	0.2	0.4	0.316	0.544723				COG1859	303	188	176	0.532332
COG1857	66.8	33.8	24.7	0.218791				COG1861	130	33	123	0.452094
COG1858	392	1347	336	0.021904				COG1862	14610	12780	1103	0.135822
COG1859	109	142	30.1	0.304153				COG1863	144	234	46.6	0.087415
COG1861	276	8.8	251	0.318898				COG1864	816	295	230	0.053407
COG1862	14400	14360	1886	0.983596				COG1865	57.8	15.8	20.6	0.076232
COG1863	90.6	159	60.7	0.290795				COG1866	7517	4169	1721	0.087648
COG1864	737	2562	806	0.053451				COG1867	30.2	59	15.1	0.093207
COG1865	33.2	38.8	8.02	0.50494				COG1868	3170	5083	1392	0.206766
COG1866	8532	10560	3237	0.548445				COG1869	3212	3337	1221	0.920981
COG1867	16	80.8	52.9	0.255812				COG1871	2823	4659	1314	0.199804
COG1868	2652	3080	1429	0.772231				COG1872	421	335	123	0.503764
COG1869	2229	829	648	0.06265				COG1873	9745	8657	2039	0.608165
COG1871	2459	2932	1474	0.756558				COG1874	17390	8720	4062	0.06536
COG1872	427	169	97.1	0.028838				COG1875	690	413	124	0.055364
COG1873	9407	10660	1237	0.340602				COG1876	10630	10340	2020	0.889393
COG1874	20070	23080	7030	0.679827				COG1877	0.4	0.2	0.316	0.544723
COG1875	568	525	145	0.773917				COG1878	7888	8893	1345	0.476236
COG1876	9395	7225	1976	0.30409				COG1879	64410	46360	12777	0.195432
COG1877	0.4	1.4	0.721	0.203033				COG1881	1555	1524	521	0.954023
COG1878	8082	5390	1545	0.119621				COG1882	23440	20020	4862	0.501725
COG1879	65200	81740	16352	0.341392				COG1883	12530	10250	2379	0.365872
COG1881	1575	454	422	0.029018				COG1884	1748	1299	315	0.191803
COG1882	21320	24920	3784	0.36932				COG1886	468	587	340	0.73536
COG1883	11020	12760	1174	0.176499				COG1887	17000	9453	3821	0.083664
COG1884	1057	2999	657	0.018227				COG1893	12450	11070	1406	0.355239
COG1886	477	229	221	0.294064				COG1894	11700	8825	2487	0.280991
COG1887	19210	21930	6454	0.68454				COG1895	2796	855	1010	0.090952
COG1893	13150	12510	1305	0.637047				COG1896	14150	12570	1032	0.164369
COG1894	12640	15780	2848	0.302248				COG1897	11770	10250	1722	0.40327
COG1895	3146	5401	1928	0.275726				COG1898	15420	11250	3004	0.202567
COG1896	13510	13680	1429	0.90826				COG1899	30.8	59.8	14.9	0.087373
COG1897	12190	11190	1253	0.44773				COG1900	2.8	1.2	0.938	0.126543
COG1898	15820	20940	4055	0.242317				COG1902	20410	17790	4189	0.549063
COG1899	19	81.8	53	0.269798				COG1903	9123	8364	1472	0.620033
COG1900	4	2.6	1.36	0.334752				COG1904	4541	5548	1454	0.508294
COG1902	19850	23050	3635	0.404355				COG1905	14080	10700	2858	0.270954
COG1903	9909	10020	1120	0.923465				COG1906	79	38.2	50	0.438265
COG1904	3883	4791	1277	0.497415				COG1908	3129	1156	927	0.065847
COG1905	14330	17190	2746	0.328066				COG1910	2809	898	995	0.090877
COG1906	9	27.8	5.47	0.008872				COG1911	164	98.4	119	0.599001
COG1908	3626	5549	1836	0.325549				COG1912	672	248	324	0.226692
COG1910	3196	5413	1935	0.284984				COG1913	0	0.8	0.374	0.06498
COG1911	37.6	46.6	13.9	0.536301				COG1914	8173	8015	1138	0.893004
COG1912	1566	67.8	741	0.077865				COG1915	410	151	121	0.065265
COG1913	2	0.4	1.78	0.394368				COG1916	127	32.4	125	0.467568
COG1914	8196	9106	1106	0.43451				COG1917	17440	15060	1899	0.245426
COG1915	175	220	77.1	0.575751				COG1918	28430	26660	5173	0.741052
COG1916	265	7.4	245	0.323284				COG1921	1122	933	327	0.578901
COG1917	16670	16550	1974	0.953007				COG1922	12080	10950	1230	0.385254
COG1918	26670	26760	2988	0.976709				COG1923	3571	5515	1491	0.228575
COG1921	864	770	253	0.71868				COG1924	16040	14560	3555	0.688114
COG1922	11410	12710	1480	0.405237				COG1925	43860	31290	8024	0.155864
COG1923	2430	3351	1548	0.568335				COG1926	0.6	0.2	0.447	0.39719
COG1924	15640	19620	2493	0.149061				COG1928	56.6	17.6	21.5	0.107409
COG1925	47140	51210	10710	0.713824				COG1929	13510	12340	881	0.220853
COG1926	2.6	0.6	1.06	0.095463				COG1930	2056	1478	377	0.163655
COG1928	40.6	36.6	7.31	0.599106				COG1932	10990	9417	2235	0.501433
COG1929	12930	12910	1607	0.990372				COG1934	362	371	195	0.964335
COG1930	1831	897	490	0.093048				COG1936	13.2	9.4	5.88	0.536423
COG1932	11250	12380	1835	0.555168				COG1937	15950	11900	3126	0.231206
COG1934	451	137	214	0.180393				COG1938	0.8	1.4	0.775	0.460954
COG1936	5.6	4.2	1.45	0.36232				COG1939	13620	12150	1164	0.242185
COG1937	17390	17960	3358	0.869429				COG1940	59220	51240	4260	0.097935
COG1938	0.2	0.4	0.316	0.544723				COG1941	247	176	75	0.37647
COG1939	13130	13060	1520	0.964392				COG1942	4057	3628	1405	0.767909
COG1940	54560	55390	6049	0.894255				COG1943	42780	30040	7024	0.107286
COG1941	249	125	104	0.267488				COG1944	1291	746	833	0.531325
COG1942	3677	2513	1019	0.286403				COG1945	16.2	18.8	7.48	0.736993
COG1943	46380	52240	11833	0.63376				COG1946	62.4	184	177	0.511747
COG1944	1270	2020	951	0.453085				COG1947	12190	10680	1687	0.396861
COG1945	7.4	4.4	2.92	0.334125				COG1949	63.8	184	177	0.516127
COG1946	15	83.8	38	0.108093				COG1950	1601	1409	515	0.718853
COG1947	12120	12650	1204	0.671322				COG1951	14880	11150	3087	0.261484
COG1949	16	84.8	38.1	0.108859				COG1952	61.6	182	177	0.514502
COG1950	1718	277	388	0.005915				COG1953	2455	2801	1242	0.787656
COG1951	16100	18570	3348	0.481801				COG1954	1273	897	289	0.228575
COG1952	10.4	84.2	38.4	0.09104				COG1955	30.2	59	15.1	0.093207
COG1953	1682	341	672	0.081313				COG1956	2262	1362	834	0.312033
COG1954	813	680	224	0.567216				COG1957	16210	13530	3602	0.478155
COG1955	16	80.8	52.9	0.255812				COG1958	30.2	59	15.1	0.093207
COG1956	2615	3699	1277	0.420501				COG1959	40660	32940	5672	0.210598
COG1957	12500	12180	4010	0.938357				COG1960	12800	17990	4500	0.282062
COG1958	16	80.8	52.9	0.255812				COG1961	134800	133300	29447	0.960624
COG1959	41420	45210	7667	0.634343				COG1962	15.2	18.2	7.22	0.688881
COG1960	11860	11910	4352	0.991114				COG1963	4473	5885	1370	0.332847
COG1961	126600	154600	16696	0.132051				COG1964	2713	833	983	0.092161
COG1962	7.4	5	2.42	0.350482				COG1965	59.4	181	176	0.508779
COG1963	3186	3737	1684	0.751852				COG1966	9504	8912	2212	0.795787
COG1964	3104	5364	1931	0.275585				COG1968	16870	13140	2594	0.188418
COG1965	8.4	83.4	38.1	0.084531				COG1969	236	141	76.1	0.245525
COG1966	9645	11710	1480	0.200562				COG1970	11430	11660	420	0.599313
COG1968	17580	18930	3385	0.700425				COG1971	14340	14330	3158	0.997551
COG1969	239	49.4	88.3	0.063933				COG1972	1339	1460	516	0.820356
COG1970	10330	8646	744	0.0534				COG1974	21650	22230	949	0.558184
COG1971	13100	15600	1826	0.208177				COG1975	10810	8383	2445	0.349943
COG1972	1365	357	533	0.095204				COG1977	1389	1449	469	0.90138
COG1974	20030	18870	1111	0.327013				COG1979	13430	11140	2472	0.381439
COG1975	11910	15100	3070	0.329139				COG1981	1.6	0.6	0.566	0.115036
COG1977	1424	398	509	0.078647				COG1982	20910	19350	3194	0.638369
COG1979	13620	13910	1986	0.8875				COG1983	9155	5657	1338	0.030909
COG1981	3.6	1.6	1.23	0.143433				COG1984	3423	1521	1004	0.094819
COG1982	19760	22960	2564	0.247307				COG1985	11560	11040	1262	0.691058
COG1983	9214	11650	3514	0.507748				COG1986	68.2	274	164	0.245912
COG1984	3804	5800	2021	0.352264				COG1987	3005	4984	1380	0.189332
COG1985	11900	10890	944	0.31581				COG1988	85.4	209	174	0.498963
COG1986	10.8	96.8	32	0.027551				COG1989	4642	3437	726	0.135386
COG1987	2614	3033	1422	0.775788				COG1990	138	84.2	58.2	0.38576
COG1988	81.8	91.2	65.5	0.889362				COG1993	45	15.8	13.2	0.058233
COG1989	4130	3692	875	0.630332				COG1994	7217	10630	2723	0.245451
COG1990	96.6	28.6	26.5	0.033349				COG1995	3799	5238	1407	0.336262
COG1993	15.4	18	4.92	0.611189				COG1996	164	98.4	119	0.599001
COG1994	5379	6726	3067	0.67215				COG1997	9.4	92.8	46.3	0.109059
COG1995	2900	4692	1158	0.160214				COG1999	205	217	80.6	0.885356
COG1996	37.6	46.6	13.9	0.536301				COG2001	14460	12730	915	0.095415
COG1997	2.8	13.8	9.21	0.266328				COG2002	14540	14330	3052	0.946825
COG1999	195	127	70.4	0.362301				COG2003	16310	14400	1342	0.192418
COG2001	13580	13250	1303	0.806398				COG2005	1071	797	313	0.407205
COG2002	12990	14790	1873	0.364677				COG2006	7867	3184	2268	0.072768
COG2003	16630	15690	1967	0.645487				COG2008	10200	9055	2309	0.633351
COG2005	783	770	229	0.956723				COG2009	73.6	198	175	0.494945
COG2006	9475	12280	3864	0.488617				COG2010	210	219	80	0.907401
COG2008	11370	11780	2097	0.849859				COG2011	13910	12630	1070	0.265731
COG2009	17.2	89.8	40.1	0.107538				COG2013	6233	6989	1627	0.654655
COG2010	204	129	71	0.324113				COG2014	361	177	87.2	0.067744
COG2011	13480	13130	1235	0.783997				COG2015	436	357	160	0.635574
COG2013	6716	5020	1714	0.351509				COG2017	30690	26220	2227	0.079626
COG2014	268	84	86.1	0.065428				COG2018	204	217	80.5	0.875644
COG2015	227	158	56.3	0.259084				COG2019	164	98.4	119	0.599001
COG2017	28660	29320	3482	0.854369				COG2020	3351	5358	1406	0.191238
COG2018	197	126	71.2	0.345597				COG2021	431	347	101	0.433431
COG2019	37.6	46.6	13.9	0.536301				COG2022	5384	2928	1213	0.077587
COG2020	2705	3464	1441	0.612596				COG2025	9656	12680	2960	0.336915
COG2021	367	1258	370	0.042671				COG2026	2288	1478	575	0.19632
COG2022	6719	7256	2253	0.817602				COG2027	349	385	187	0.852748
COG2025	9086	9015	2754	0.980063				COG2028	0.6	0	0.245	0.039962
COG2026	3393	846	1328	0.0915				COG2030	1155	694	195	0.04585
COG2027	258	222	72.4	0.634164				COG2031	39.4	19.4	13.8	0.185647
COG2028	0.2	0.6	0.316	0.241488				COG2032	663	567	197	0.639871
COG2030	698	1710	287	0.007844				COG2033	9665	8228	1865	0.46324
COG2031	59.4	27.8	37	0.417972				COG2035	2901	1771	633	0.112241
COG2032	451	620	171	0.351523				COG2036	30.2	59	15.1	0.093207
COG2033	9798	10490	1189	0.576633				COG2038	10690	9653	1587	0.531686
COG2035	2547	2425	729	0.871174				COG2039	3223	2798	1099	0.709083
COG2036	16	80.8	52.9	0.255812				COG2040	3870	2376	1683	0.400606
COG2038	10840	10900	999	0.953584				COG2041	497	536	243	0.877914
COG2039	2735	2410	935	0.737008				COG2043	209	122	86.5	0.346018
COG2040	4476	4115	1927	0.85608				COG2044	0	0.2	0.2	0.34658
COG2041	446	263	80.4	0.052317				COG2045	151	63.6	92.7	0.373402
COG2043	228	52	85.6	0.074019				COG2046	189	177	75.8	0.882135
COG2045	44.8	26.6	15.6	0.27587				COG2048	3372	1169	934	0.046144
COG2046	188	49.8	55.1	0.035998				COG2049	3260	1333	952	0.077528
COG2048	3839	6738	2203	0.224745				COG2050	8355	8967	1619	0.715241
COG2049	3662	5695	1999	0.338969				COG2052	8653	7593	1903	0.592721
COG2050	8830	6584	1311	0.124953				COG2055	6497	4585	995	0.090858
COG2052	8691	9974	1159	0.300586				COG2056	53.4	15	19.4	0.082605
COG2055	5362	6525	2066	0.588938				COG2057	2332	4600	1424	0.14985
COG2056	32.6	30.8	8.21	0.832002				COG2059	18710	20290	4494	0.734211
COG2057	2047	2644	1485	0.698168				COG2060	1863	990	318	0.025382
COG2059	16830	20540	2719	0.209562				COG2062	246	358	179	0.549155
COG2060	1138	2092	472	0.078081				COG2063	236	339	182	0.584993
COG2062	206	134	65.6	0.300468				COG2064	367	318	166	0.774879
COG2063	187	130	66.8	0.418352				COG2065	5099	3316	1555	0.284676
COG2064	408	181	105	0.062556				COG2066	5786	7092	892	0.181322
COG2065	5639	4805	1939	0.67843				COG2067	720	574	233	0.547091
COG2066	5544	6005	1134	0.695021				COG2068	8950	8136	2015	0.696885
COG2067	494	1559	392	0.02639				COG2069	2718	854	981	0.094023
COG2068	9240	10200	1289	0.477692				COG2070	19050	17320	4230	0.693248
COG2069	3113	5380	1934	0.274846				COG2071	10610	11500	714	0.247991
COG2070	19760	22180	3020	0.446021				COG2072	232	340	182	0.569958
COG2071	9256	6759	838	0.017628				COG2073	9113	8362	1472	0.623726
COG2072	189	128	65.9	0.380514				COG2074	13.2	9.4	5.88	0.536423
COG2073	9909	10020	1118	0.923331				COG2076	2310	2974	948	0.503557
COG2074	5.6	4.2	1.45	0.36232				COG2077	2477	1473	740	0.211779
COG2076	891	743	141	0.323862				COG2078	60.8	73.2	16.6	0.476959
COG2077	2628	3432	1199	0.521275				COG2079	364	381	241	0.946111
COG2078	29.6	91.8	51.5	0.261309				COG2080	17610	14900	4241	0.540713
COG2079	157	264	71.7	0.172539				COG2081	19910	17270	4181	0.545361
COG2080	18190	24270	3915	0.159051				COG2082	9320	8463	1470	0.575947
COG2081	20560	22240	3490	0.643178				COG2084	2685	2375	435	0.496164
COG2082	10140	10060	1153	0.946394				COG2085	179	220	73.7	0.595004
COG2084	2120	1694	376	0.290013				COG2086	9634	12660	2954	0.335666
COG2085	224	123	41.8	0.042132				COG2087	16010	11890	2669	0.161311
COG2086	9059	8996	2757	0.982331				COG2088	11990	10080	2460	0.459925
COG2087	17290	17860	2931	0.850669				COG2089	1524	825	316	0.058173
COG2088	12940	11940	1620	0.554277				COG2091	11250	8594	2674	0.349694
COG2089	2002	489	525	0.0205				COG2093	163	191	79.1	0.730573
COG2091	12090	16750	3342	0.200761				COG2094	5598	7522	799	0.042726
COG2093	143	104	30.3	0.231978				COG2095	535	643	346	0.762629
COG2094	4456	4628	984	0.865589				COG2096	5309	3171	815	0.030537
COG2095	515	373	235	0.563193				COG2099	9124	8379	1478	0.627707
COG2096	5845	7064	2368	0.62062				COG2100	120	30	121	0.475679
COG2099	9911	10020	1122	0.92499				COG2102	90.2	101	27.4	0.693524
COG2100	260	5.6	242	0.322858				COG2103	3891	3132	970	0.45649
COG2102	111	120	90.3	0.924769				COG2104	8521	4181	2284	0.093899
COG2103	3229	2407	1125	0.485679				COG2105	405	407	169	0.991765
COG2104	10380	12900	4122	0.557897				COG2107	245	95.2	81.3	0.102341
COG2105	270	161	72.9	0.172591				COG2108	207	99.4	77.1	0.198692
COG2107	184	1199	373	0.026082				COG2109	10140	8965	1882	0.549807
COG2108	223	39.8	86	0.065502				COG2110	18990	18480	1924	0.797632
COG2109	9853	10760	1352	0.52114				COG2111	212	252	59	0.512619
COG2110	20070	17770	2210	0.328419				COG2112	114	34.4	95.3	0.425759
COG2111	135	188	67.8	0.453855				COG2113	135	416	168	0.13323
COG2112	21.2	1.2	14.8	0.214484				COG2114	1159	586	734	0.457632
COG2113	45	143	32.4	0.016731				COG2115	533	371	98.6	0.139146
COG2114	2016	235	1448	0.253818				COG2116	8281	7810	2019	0.821396
COG2115	408	439	90.6	0.73955				COG2119	269	259	70.3	0.888257
COG2116	9171	9844	1681	0.699386				COG2120	1213	680	202	0.029995
COG2119	231	156	71.9	0.328599				COG2121	351	298	105	0.624624
COG2120	747	746	111	0.994451				COG2122	15.4	4.4	3.45	0.012875
COG2121	222	86.6	54.3	0.03697				COG2124	207	221	79	0.861893
COG2122	5	12.6	3.98	0.092752				COG2127	476	408	246	0.788656
COG2124	207	129	71.3	0.310531				COG2128	251	435	162	0.288986
COG2127	478	138	229	0.175841				COG2129	1280	693	314	0.097877
COG2128	193	145	62.2	0.457299				COG2130	0.2	0.2	0.283	>0.999999
COG2129	1093	595	454	0.305219				COG2131	15130	12990	1198	0.111819
COG2130	0.4	0.4	0.346	>0.999999				COG2132	3125	3007	1146	0.920531
COG2131	14460	14590	1675	0.940029				COG2133	442	286	188	0.432102
COG2132	1882	2352	930	0.626759				COG2134	59	181	176	0.508082
COG2133	232	129	71.9	0.189181				COG2135	5939	2690	1701	0.09256
COG2134	8	82.6	38.2	0.086454				COG2137	14690	12920	956	0.101178
COG2135	5681	8421	2756	0.34928				COG2138	229	162	48.4	0.205936
COG2137	14070	14410	1725	0.84864				COG2140	233	116	72	0.141461
COG2138	224	289	107	0.55897				COG2141	3586	2842	788	0.372503
COG2140	258	240	92.6	0.852426				COG2142	59	181	176	0.507306
COG2141	4121	2683	958	0.171797				COG2145	10750	9763	1966	0.629222
COG2142	8.6	82.6	38.2	0.088493				COG2146	265	399	176	0.467035
COG2143	0.2	0.2	0.283	>0.999999				COG2148	37290	28460	4906	0.109578
COG2145	12000	10740	1585	0.449578				COG2149	3.2	3.2	2.21	>0.999999
COG2146	206	210	57.1	0.935111				COG2151	8060	7298	2850	0.795926
COG2148	37750	39420	6668	0.808558				COG2152	3664	2243	656	0.062179
COG2149	5	3	2.14	0.378383				COG2153	8387	7673	2334	0.767438
COG2151	7286	5845	2333	0.553925				COG2154	182	181	71.6	0.980546
COG2152	4420	3107	754	0.11963				COG2155	9705	8589	2048	0.600622
COG2153	6747	3460	1047	0.013796				COG2156	1827	990	307	0.025981
COG2154	185	55.6	56	0.050307				COG2158	4214	1733	1201	0.072678
COG2155	9240	10600	1205	0.291819				COG2159	11450	9521	2192	0.404509
COG2156	1107	2081	506	0.090619				COG2160	10080	7761	2079	0.297122
COG2158	5817	6328	1972	0.802093				COG2161	2159	1236	776	0.268294
COG2159	10840	11980	1252	0.388971				COG2162	669	351	121	0.030209
COG2160	10030	14360	2779	0.157859				COG2163	517	329	162	0.276813
COG2161	2356	2400	984	0.965418				COG2165	6159	7843	1637	0.333596
COG2162	431	285	142	0.334865				COG2166	478	502	375	0.95101
COG2163	322	394	114	0.549095				COG2168	59.6	181	176	0.509577
COG2165	4751	4749	1644	0.999059				COG2169	349	322	190	0.890705
COG2166	263	1456	453	0.030174				COG2170	6.6	3.4	2.74	0.276821
COG2168	8.2	82.6	38.2	0.087214				COG2171	3245	2421	779	0.321227
COG2169	216	176	100	0.700066				COG2172	14530	10770	2729	0.205643
COG2170	4.2	1.8	1.33	0.109784				COG2173	563	197	144	0.034889
COG2171	3623	3573	1298	0.970216				COG2175	59.2	182	176	0.507084
COG2172	14560	17190	2726	0.362884				COG2176	30870	26810	3067	0.2221
COG2173	326	335	98.7	0.929556				COG2177	14510	10780	3138	0.268599
COG2175	8.4	83	38.3	0.087364				COG2179	14430	12720	1227	0.200847
COG2176	28850	29570	4169	0.867185				COG2180	1141	1227	444	0.851316
COG2177	14830	18180	3613	0.380958				COG2181	1362	1345	489	0.973119
COG2179	13780	13220	1557	0.728484				COG2182	6220	4915	1229	0.319358
COG2180	1270	253	525	0.088816				COG2183	12220	10620	1849	0.411946
COG2181	1501	297	450	0.028139				COG2184	4346	3188	624	0.100729
COG2182	6399	4002	1137	0.068023				COG2185	254	303	54.4	0.398082
COG2183	12550	12560	1452	0.994675				COG2186	18300	17110	4361	0.791872
COG2184	6385	1703	1165	0.00385				COG2187	0.8	0.6	0.447	0.666588
COG2185	247	128	43.4	0.02577				COG2188	33820	31110	1551	0.118635
COG2186	18640	20790	2997	0.493618				COG2189	4628	6568	1079	0.110014
COG2187	2.8	1	1.2	0.171943				COG2190	14620	14310	1040	0.773331
COG2188	29320	25980	3864	0.412587				COG2191	56.2	85.4	23.1	0.241295
COG2189	3890	3287	1718	0.734618				COG2192	412	136	121	0.052058
COG2190	13420	10720	1945	0.202521				COG2193	567	561	244	0.98033
COG2191	29.8	37.4	9.78	0.459367				COG2194	1084	1204	673	0.86286
COG2192	177	219	78.2	0.602373				COG2195	20650	17800	1497	0.093397
COG2193	672	186	204	0.044068				COG2197	43550	35340	4493	0.105072
COG2194	497	1906	451	0.014117				COG2198	1414	727	273	0.036036
COG2195	19890	21390	3583	0.686529				COG2199	53700	44160	9244	0.332255
COG2197	42110	37400	7029	0.521702				COG2200	40260	28610	6954	0.132419
COG2198	1162	479	294	0.048383				COG2201	3869	5619	1324	0.222791
COG2199	54850	55280	6367	0.947811				COG2202	322	433	170	0.53337
COG2200	43580	44890	8032	0.874491				COG2203	176	160	77	0.832842
COG2201	3747	3626	1661	0.943721				COG2204	16950	18680	2845	0.559944
COG2202	271	241	81.2	0.7268				COG2205	33820	27650	6767	0.388509
COG2203	186	47.4	55.6	0.036995				COG2206	22940	22920	4862	0.996818
COG2204	15230	18300	1920	0.14847				COG2207	166100	132400	29721	0.289683
COG2205	33850	39630	5982	0.362211				COG2208	16520	14880	3242	0.626553
COG2206	24860	24850	3064	0.997475				COG2209	419	318	217	0.652693
COG2207	166400	200800	30142	0.286774				COG2210	61.8	39	21.7	0.324339
COG2208	16980	19270	2208	0.329981				COG2211	45540	39140	3709	0.122674
COG2209	250	1371	418	0.027908				COG2212	109	153	52	0.428571
COG2210	54	52.8	19.8	0.953246				COG2213	1945	1180	710	0.3127
COG2211	45620	41740	4978	0.458122				COG2215	63.8	204	192	0.48689
COG2212	70.4	67.4	14.4	0.840046				COG2216	1864	990	319	0.025439
COG2213	1630	2359	926	0.453804				COG2217	59860	53430	6561	0.355803
COG2215	12.6	93.2	40	0.078674				COG2220	8606	8846	1688	0.890433
COG2216	1138	2093	472	0.077774				COG2221	18260	16030	3583	0.551008
COG2217	59730	57800	5984	0.755332				COG2222	7166	3983	1406	0.053351
COG2220	8110	8392	1287	0.832078				COG2223	4784	4986	1654	0.905815
COG2221	17480	21020	2684	0.223716				COG2224	59.2	181	176	0.508133
COG2222	7040	8625	2991	0.610543				COG2225	118	362	352	0.507735
COG2223	3998	2209	963	0.100157				COG2226	60960	59950	9459	0.917592
COG2224	8.2	83	38	0.084871				COG2227	9261	9677	1456	0.782376
COG2225	16.4	165	75.9	0.085702				COG2229	174	159	77.3	0.849085
COG2226	58480	63850	5729	0.376022				COG2230	10470	9396	1265	0.420431
COG2227	8870	7654	1635	0.478212				COG2231	253	108	158	0.385862
COG2229	181	45.4	55.4	0.039757				COG2232	164	98.4	119	0.599001
COG2230	11050	12120	1587	0.519255				COG2233	30130	25650	2611	0.12451
COG2231	665	67.8	406	0.179455				COG2234	3959	1681	1009	0.05388
COG2232	37.6	46.6	13.9	0.536301				COG2235	4465	4057	1345	0.769372
COG2233	29340	31600	4920	0.658228				COG2236	159	92.8	128	0.617608
COG2234	4165	7267	2269	0.20879				COG2237	89.8	25.8	30.5	0.06914
COG2235	4032	2396	999	0.14012				COG2239	11610	10090	2216	0.51207
COG2236	285	89.2	266	0.482941				COG2240	13300	10390	2105	0.2042
COG2237	43.2	41	11.3	0.849953				COG2241	1280	1204	438	0.866581
COG2239	11120	11790	1451	0.656621				COG2242	9318	8664	1454	0.664785
COG2240	13250	14770	2273	0.522494				COG2243	9321	8425	1396	0.538981
COG2241	1388	242	450	0.034354				COG2244	48420	40050	3952	0.067054
COG2242	10100	10180	1121	0.944875				COG2246	16820	14790	1534	0.222352
COG2243	10160	9995	1153	0.889701				COG2247	5475	9707	2703	0.156031
COG2244	46250	48880	5874	0.666212				COG2249	1642	1591	469	0.916144
COG2246	15720	16470	2636	0.783202				COG2250	292	250	79.9	0.613289
COG2247	4228	5476	3182	0.705166				COG2251	0.6	0.4	0.469	0.681047
COG2249	2266	436	238	5.8e-05				COG2252	18640	16000	1292	0.075309
COG2250	265	199	71.9	0.391275				COG2253	3169	1672	415	0.006932
COG2251	2.6	0.8	1.05	0.124471				COG2255	15410	13490	1123	0.125756
COG2252	16310	16150	2123	0.941784				COG2256	17440	14330	1537	0.077665
COG2253	4555	1578	905	0.011001				COG2257	2863	4717	1334	0.201944
COG2255	14680	14810	1661	0.939555				COG2258	10290	8002	2414	0.371027
COG2256	16510	17240	2317	0.760749				COG2259	668	716	364	0.897405
COG2257	2432	2933	1468	0.741729				COG2261	2264	1211	791	0.219997
COG2258	11460	14880	2980	0.284199				COG2262	14780	13020	980	0.110139
COG2259	445	1546	407	0.026811				COG2264	14130	12500	1024	0.149989
COG2261	2324	3569	1222	0.337949				COG2265	34050	28260	3333	0.120588
COG2262	14210	14630	1743	0.815679				COG2267	25260	20600	3744	0.248509
COG2264	13320	14310	1725	0.581895				COG2268	1842	1250	391	0.168751
COG2265	34380	35560	5695	0.841032				COG2269	184	213	201	0.891375
COG2267	24930	29980	4421	0.286399				COG2270	6851	8116	1112	0.288349
COG2268	1510	748	543	0.198094				COG2271	16430	17190	2293	0.748837
COG2269	273	88.8	246	0.474618				COG2272	1927	838	400	0.026202
COG2270	6365	4419	1338	0.18404				COG2273	1574	983	315	0.097657
COG2271	16560	9766	1389	0.001209				COG2274	13380	13180	1441	0.893076
COG2272	1081	936	293	0.6339				COG2301	6039	4124	1349	0.19365
COG2273	1663	2056	554	0.498276				COG2302	13550	12110	1131	0.238749
COG2274	14540	9007	2070	0.028255				COG2303	326	581	343	0.478483
COG2301	5315	7902	2658	0.358943				COG2304	53.2	119	42.4	0.161492
COG2302	13120	13050	1521	0.964429				COG2306	256	180	55.1	0.205201
COG2303	218	293	64.6	0.277598				COG2307	41.2	13.4	12.7	0.060791
COG2304	51	69.2	18.1	0.344542				COG2308	421	274	117	0.24455
COG2306	234	296	107	0.575322				COG2309	10900	9305	2334	0.513667
COG2307	16.6	15.8	6.43	0.90402				COG2310	7786	4032	2188	0.124567
COG2308	426	102	87.8	0.006149				COG2311	383	307	215	0.731274
COG2309	11260	11270	1513	0.994889				COG2312	184	197	84.5	0.879783
COG2310	9508	12360	3996	0.495683				COG2313	614	442	206	0.426621
COG2311	226	1347	415	0.027042				COG2314	1311	1009	235	0.235239
COG2312	151	109	32.6	0.23326				COG2315	14710	11910	2389	0.274986
COG2313	395	499	104	0.345324				COG2316	4820	2099	1145	0.044737
COG2314	847	743	138	0.469917				COG2317	849	608	195	0.249541
COG2315	14460	17710	3337	0.358628				COG2318	1	0	1	0.34658
COG2316	4719	6694	2135	0.382001				COG2319	415	484	141	0.635151
COG2317	651	412	161	0.176424				COG2320	807	421	203	0.094107
COG2318	0.6	0	0.6	0.346715				COG2321	373	400	318	0.935349
COG2319	418	200	121	0.109915				COG2322	0.2	0	0.2	0.34658
COG2320	813	528	239	0.266153				COG2323	11360	14340	1407	0.067105
COG2321	692	183	423	0.263153				COG2324	0.6	0.2	0.447	0.39719
COG2322	0.2	0.2	0.283	>0.999999				COG2326	7380	3988	1170	0.019893
COG2323	8154	10330	1903	0.285959				COG2327	3617	1447	1127	0.090427
COG2324	2.6	0.6	1.06	0.095463				COG2329	25.6	35.2	12.4	0.462277
COG2326	8552	7603	2103	0.6638				COG2331	572	421	174	0.409398
COG2327	3928	6065	2059	0.32958				COG2332	279	302	225	0.923266
COG2329	33	22.2	12.8	0.422703				COG2333	23070	20690	2715	0.406302
COG2331	639	114	187	0.023096				COG2334	10960	12660	2899	0.573771
COG2332	240	128	91.4	0.255416				COG2335	366	126	122	0.084986
COG2333	22530	23270	2713	0.791967				COG2336	425	266	124	0.236008
COG2334	9124	13660	1581	0.020845				COG2337	25620	23340	5177	0.671269
COG2335	449	1204	445	0.127765				COG2339	380	328	208	0.81017
COG2336	508	160	210	0.135234				COG2340	5981	7000	1433	0.497106
COG2337	25870	29550	3246	0.289765				COG2342	5.6	0.2	4.64	0.277795
COG2339	720	142	425	0.210403				COG2343	1.4	1.2	0.632	0.759904
COG2340	6043	4872	1647	0.497376				COG2344	13850	12140	1003	0.126483
COG2342	1	2.6	1.29	0.249489				COG2345	132	207	174	0.677007
COG2343	5.6	1.6	2.13	0.096724				COG2346	174	159	76.9	0.846279
COG2344	13540	14160	1532	0.696254				COG2348	1448	907	298	0.107285
COG2345	47.4	116	34.8	0.085688				COG2350	298	217	101	0.445561
COG2346	179	45.8	55.3	0.043064				COG2351	1	0.2	0.49	0.141112
COG2348	1607	1097	575	0.40083				COG2352	1884	1181	708	0.34959
COG2350	198	59.4	52.8	0.03067				COG2353	236	341	182	0.581302
COG2351	0.8	0.6	0.633	0.759946				COG2354	61.4	183	176	0.511608
COG2352	2157	2171	991	0.989076				COG2355	5844	7169	1545	0.41594
COG2353	187	128	66	0.397476				COG2356	620	532	197	0.668657
COG2354	8.8	83.4	37.9	0.084382				COG2357	30310	21720	4239	0.077299
COG2355	4117	4630	1495	0.740406				COG2358	7978	7407	1984	0.780831
COG2356	422	233	141	0.217926				COG2359	1396	985	240	0.125015
COG2357	32530	34420	8176	0.822994				COG2360	365	373	199	0.968842
COG2358	8400	9540	1140	0.346626				COG2361	334	314	68.9	0.774745
COG2359	932	604	235	0.200028				COG2362	831	404	193	0.05821
COG2360	468	138	224	0.178639				COG2363	62	184	175	0.50714
COG2361	432	216	115	0.098433				COG2364	19510	18470	2781	0.71811
COG2362	402	342	76	0.45111				COG2365	13940	10650	4069	0.44215
COG2363	10.4	84.8	38.2	0.087647				COG2366	59.6	181	176	0.50966
COG2364	19390	21390	2476	0.442557				COG2367	12470	5372	2866	0.038299
COG2365	11520	12600	4483	0.815688				COG2368	2112	4410	1451	0.151997
COG2366	8.6	82.8	38.3	0.088959				COG2369	183	170	51.8	0.811151
COG2367	14650	18020	5814	0.578113				COG2370	1	0.2	0.374	0.064966
COG2368	1669	2600	1423	0.531166				COG2371	2920	1013	981	0.087742
COG2369	130	76.4	49.8	0.313238				COG2372	59.6	181	176	0.50976
COG2370	2.8	0.8	1.09	0.102826				COG2373	818	617	217	0.381065
COG2371	3240	5429	1950	0.294257				COG2374	1279	623	325	0.07865
COG2372	8.2	82.8	38.1	0.085655				COG2375	61.6	183	177	0.512076
COG2373	753	1716	576	0.133447				COG2376	10960	12100	1369	0.429046
COG2374	1573	1464	580	0.855534				COG2377	513	417	181	0.610702
COG2375	8.8	83.8	37.8	0.082764				COG2378	24250	27000	5882	0.652601
COG2376	8030	7211	1773	0.656397				COG2379	727	333	196	0.07957
COG2377	220	324	66.9	0.156068				COG2382	3167	2076	527	0.072332
COG2378	22350	23990	4479	0.723754				COG2384	14160	12490	1274	0.226182
COG2379	286	284	71.3	0.976145				COG2385	12950	13740	3077	0.803884
COG2382	3794	3268	723	0.487517				COG2386	279	301	225	0.921903
COG2384	13530	13190	1439	0.819177				COG2388	2538	1863	430	0.154868
COG2385	11780	14100	1805	0.234693				COG2389	0.6	0.2	0.447	0.39719
COG2386	240	128	91.4	0.255416				COG2390	10170	11240	1506	0.497489
COG2388	2139	1993	538	0.793152				COG2391	140	403	366	0.493511
COG2389	2.6	0.6	1.06	0.095463				COG2402	9.8	3.4	6.94	0.383649
COG2390	7861	7634	874	0.801542				COG2403	12.2	17	6.87	0.504398
COG2391	30	184	78.5	0.085247				COG2404	1136	1079	456	0.903589
COG2402	10.8	2.6	6.29	0.228936				COG2405	14.6	10.4	6.09	0.510039
COG2403	6.6	3.4	2.59	0.252081				COG2406	4.8	0	4.31	0.29731
COG2404	1323	199	560	0.079794				COG2407	19690	14970	2662	0.114137
COG2405	11.2	5.8	3.1	0.119189				COG2409	2390	2199	1232	0.880656
COG2406	0	1.4	0.6	0.047958				COG2413	14.6	9.8	5.9	0.439414
COG2407	16550	20870	3579	0.261843				COG2414	533	418	109	0.326088
COG2409	1504	1951	922	0.640958				COG2421	310	152	79.4	0.081436
COG2413	6.4	4.2	1.7	0.232519				COG2423	1928	2051	777	0.87815
COG2414	487	219	97.3	0.024716				COG2425	530	539	185	0.963157
COG2421	249	56.2	89.2	0.062976				COG2426	7909	7133	1736	0.666654
COG2423	844	628	225	0.365871				COG2427	0.2	0.2	0.283	>0.999999
COG2425	242	248	67.2	0.926418				COG2431	412	377	225	0.879562
COG2426	8637	9770	1412	0.445629				COG2433	1859	1311	389	0.196504
COG2427	0.2	0.2	0.283	>0.999999				COG2440	291	308	226	0.940578
COG2431	293	1376	421	0.033098				COG2442	227	231	78.5	0.960634
[truncated: 2,048 more rows]

## Sheet: KOFunctional Predictive Analysi
D14								D28
Name	Mean-Ctrl	Mean-FGC	SEM	P-Value				Name	Mean-Ctrl	Mean-FGC	SEM	P-Value
K00001	2913	908	389	0.000869				K00001	4072	3672	1191	0.745607
K00003	18390	19870	3897	0.714025				K00003	16900	11940	3130	0.151706
K00005	5328	4024	1478	0.403358				K00005	6489	8092	1491	0.313719
K00008	13490	17080	2952	0.258588				K00008	14360	10910	3009	0.284762
K00009	1349	2042	881	0.454014				K00009	1536	846	774	0.398681
K00010	527	529	135	0.985129				K00010	805	499	183	0.132228
K00012	7837	8841	2271	0.6701				K00012	7005	3592	1345	0.034846
K00013	10520	12400	1579	0.267817				K00013	10770	9544	2132	0.581076
K00014	19870	23850	5281	0.472695				K00014	18600	13620	3396	0.180675
K00016	21130	15950	2534	0.075154				K00016	21740	19610	2499	0.418825
K00018	6088	5800	1283	0.828072				K00018	6317	6945	1408	0.667434
K00020	491	235	85.8	0.017513				K00020	534	588	124	0.673667
K00024	690	2806	707	0.017272				K00024	1018	846	300	0.581663
K00027	13080	13670	1657	0.731019				K00027	14770	15990	2170	0.589305
K00029	246	218	72.1	0.711735				K00029	346	381	186	0.855275
K00030	408	357	129	0.704196				K00030	721	377	132	0.031373
K00031	10470	11840	1747	0.455602				K00031	10090	9033	2133	0.633468
K00033	3926	2530	1123	0.2489				K00033	4256	3947	1397	0.830465
K00036	3835	2511	1124	0.272736				K00034	290	120	72.6	0.047822
K00040	6210	6617	1835	0.830009				K00036	4139	3874	1389	0.853482
K00041	743	438	233	0.225677				K00040	4938	2072	1313	0.060643
K00042	882	945	206	0.768503				K00041	980	573	235	0.122161
K00046	10210	11360	1566	0.483741				K00042	1458	1204	325	0.457505
K00048	4927	6527	2109	0.469767				K00046	9961	8260	1978	0.41491
K00050	286	284	71.3	0.976145				K00048	5142	2622	1270	0.082598
K00052	10770	12110	1621	0.432358				K00050	727	333	196	0.07957
K00053	10660	12030	1642	0.428261				K00052	10530	9173	2120	0.539956
K00054	3438	2206	1030	0.265906				K00053	10480	9120	2140	0.542922
K00055	1274	192	522	0.071888				K00054	3775	3440	1424	0.819896
K00057	14690	14820	1662	0.939564				K00055	1088	1054	468	0.943889
K00058	22970	25600	2851	0.383275				K00057	15440	13520	1122	0.125471
K00059	30990	35480	4243	0.320859				K00058	24190	24030	4353	0.971581
K00060	595	662	222	0.77032				K00059	31770	28250	4276	0.434206
K00065	2135	2605	1499	0.761902				K00060	752	629	236	0.616547
K00067	15620	19160	3776	0.375903				K00065	2629	4489	1235	0.170501
K00068	124	191	39.5	0.126358				K00067	14460	10640	2397	0.149641
K00073	216	233	107	0.877616				K00068	437	472	211	0.872306
K00074	9470	7609	2988	0.550772				K00073	242	308	169	0.705813
K00075	14170	14680	1889	0.794001				K00074	10450	14570	2141	0.090555
K00076	3578	5858	2087	0.306378				K00075	14860	13160	970	0.117848
K00077	13080	12450	1302	0.641544				K00076	3315	1223	1047	0.080825
K00086	1485	352	581	0.08679				K00077	12340	11030	1395	0.375054
K00087	3211	5448	1926	0.278989				K00086	1372	1213	425	0.718106
K00088	14140	14570	1709	0.80771				K00087	3025	989	1010	0.078497
K00091	305	307	74.2	0.979153				K00088	14720	12880	941	0.086356
K00096	398	178	116	0.095143				K00091	729	321	196	0.070919
K00097	2900	4692	1158	0.160214				K00096	295	381	94.2	0.388003
K00099	10790	12410	1477	0.304522				K00097	3799	5238	1407	0.336262
K00100	19650	22140	2303	0.311156				K00099	10910	9514	2014	0.507827
K00104	2053	2187	863	0.880425				K00100	20410	18270	3041	0.501575
K00111	6677	6713	1260	0.977909				K00102	156	158	56.1	0.969701
K00112	39.4	112	36	0.076805				K00104	2896	2677	1263	0.86665
K00113	9.6	86.2	39.3	0.087297				K00105	204	86.2	155	0.46867
K00121	410	410	130	0.997616				K00108	59.6	181	176	0.509425
K00123	3760	5952	2055	0.31728				K00111	6966	7749	1541	0.624991
K00124	268	214	93.8	0.579144				K00112	113	195	173	0.647329
K00127	244	131	92.7	0.254489				K00113	62.6	182	176	0.517373
K00128	5496	7898	2294	0.325619				K00116	60.8	182	176	0.509761
K00130	41.4	103	35.3	0.116958				K00121	667	880	288	0.480461
K00133	13700	14720	1915	0.608747				K00123	3626	2115	1110	0.210454
K00134	14700	14820	1668	0.944423				K00124	339	386	219	0.836985
K00135	3261	2679	1239	0.651185				K00127	289	306	227	0.942065
K00145	22080	26400	2658	0.142784				K00128	5609	2920	1158	0.048703
K00147	12160	12410	1499	0.871721				K00130	114	205	172	0.61187
K00156	191	1281	407	0.028019				K00131	262	158	119	0.407571
K00158	1271	1941	930	0.491806				K00133	13530	11500	1724	0.272909
K00161	2656	586	168	2e-06				K00134	15460	13440	1134	0.112735
K00162	2656	586	168	2e-06				K00135	4198	3855	1444	0.818221
K00169	1009	766	219	0.298726				K00140	312	258	77.7	0.503561
K00170	718	660	137	0.68184				K00145	22640	22480	4891	0.974707
K00171	487	619	123	0.316203				K00146	59	181	176	0.508082
K00172	1075	798	212	0.227316				K00147	12020	10540	1800	0.434812
K00174	1631	3599	798	0.038958				K00151	59	181	176	0.508082
K00175	4430	4516	902	0.926411				K00156	306	277	197	0.887446
K00176	1205	2003	436	0.104614				K00158	1242	584	853	0.462805
K00177	1178	1981	444	0.107919				K00161	2447	2115	482	0.510419
K00179	2183	1491	420	0.13787				K00162	2447	2115	482	0.510419
K00180	2366	2689	642	0.62867				K00163	62.2	183	177	0.514533
K00183	903	173	346	0.067724				K00164	62.4	183	177	0.51419
K00184	1588	301	494	0.031314				K00169	954	726	128	0.113013
K00194	3113	5380	1934	0.274846				K00170	790	533	108	0.045776
K00197	3127	5395	1930	0.273823				K00171	575	427	86.9	0.127483
K00198	7656	9358	1216	0.199295				K00172	1008	776	127	0.10444
K00208	1688	1582	689	0.881546				K00174	2906	2051	383	0.056287
K00215	13990	14810	1828	0.665614				K00175	4473	2939	527	0.019555
K00219	291	167	108	0.281117				K00176	1777	1178	223	0.027465
K00226	14780	15900	2437	0.658098				K00177	1730	1165	213	0.029263
K00230	26.2	115	29	0.015973				K00179	2808	2066	516	0.188332
K00231	55.4	86.4	25.8	0.264372				K00180	3052	2160	545	0.140499
K00239	4340	7102	2239	0.252296				K00183	834	409	316	0.215827
K00240	3805	6927	2280	0.208178				K00184	1476	820	498	0.223683
K00241	453	1503	380	0.024706				K00185	434	215	155	0.196825
K00243	10430	10610	3192	0.956407				K00194	2718	854	981	0.094023
K00244	11120	9906	1257	0.362284				K00197	2758	867	994	0.093482
K00245	15.6	88.2	39.3	0.102126				K00198	6713	6114	1754	0.741565
K00246								K00208	1665	1522	479	0.772877
K00248	7332	6840	3106	0.878065				K00215	13930	11720	1647	0.216368
K00257	671	1722	418	0.036028				K00219	334	306	225	0.903848
K00259	503	426	103	0.471226				K00226	14100	11510	1852	0.199499
K00262	11510	13650	2005	0.316946				K00228	59.8	182	176	0.508388
K00265	472	1586	408	0.025889				K00230	114	289	161	0.308358
K00266	36580	39700	4312	0.489963				K00231	100	41.2	36.5	0.143806
K00275	191	129	65.9	0.376982				K00239	3999	1756	993	0.053894
K00278	7853	9141	2519	0.62298				K00240	3578	1500	999	0.071123
K00281	206	1304	410	0.027965				K00241	636	555	211	0.711518
K00282	1761	2678	1420	0.536615				K00242	59	181	176	0.507306
K00283	1761	2678	1420	0.536615				K00243	9680	6578	1619	0.091661
K00284	8421	9632	1426	0.420351				K00244	13990	14330	2314	0.886828
K00285	17	165	75.9	0.086313				K00245	74.8	199	175	0.49839
K00286	14120	13020	1221	0.394123				K00246	62.6	182	176	0.517373
K00287	13730	14380	1827	0.731193				K00247	59.6	181	176	0.509577
K00290	8470	10950	1474	0.130962				K00248	7710	11360	2739	0.219434
K00297	5327	3761	879	0.112739				K00249	203	218	79.9	0.853858
K00313	474	172	175	0.123252				K00257	830	531	175	0.124725
K00324	223	213	53.5	0.850763				K00259	739	679	211	0.785903
K00325	18.2	85.2	38	0.116083				K00262	11450	9610	2276	0.442232
K00330	443	1482	378	0.025211				K00265	710	727	367	0.963392
K00331	434	1464	372	0.024357				K00266	37380	34080	7138	0.656179
K00334	12900	16240	2636	0.240744				K00275	244	340	181	0.611721
K00335	12420	15710	2819	0.276779				K00278	7296	4408	1457	0.082738
K00336	11270	11810	1550	0.736565				K00281	334	288	203	0.823333
K00337	443	1483	379	0.025228				K00282	2283	4415	1377	0.160118
K00338	443	1482	378	0.025216				K00283	2283	4415	1377	0.160118
K00339	443	1483	379	0.025174				K00284	7708	7177	1834	0.779483
K00340	443	1483	379	0.025174				K00285	119	362	352	0.508932
K00341	443	1483	379	0.025153				K00286	13700	11990	1500	0.28727
K00342	443	1483	379	0.025237				K00287	14170	12750	1208	0.273428
K00343	443	1482	378	0.025216				K00290	7688	6740	1815	0.615674
K00344	194	139	67.5	0.44373				K00297	4698	3089	761	0.067314
K00346	250	1371	418	0.027944				K00313	505	414	290	0.761793
K00347	250	1371	419	0.027969				K00322	59	181	176	0.507306
K00348	250	1371	419	0.027969				K00324	273	404	176	0.476624
K00349	250	1371	419	0.027969				K00325	63.8	184	177	0.516447
K00350	264	1383	421	0.028913				K00330	615	545	207	0.744443
K00351	250	1371	418	0.027908				K00331	604	542	205	0.769703
K00359	1964	690	455	0.023292				K00332	222	237	79.3	0.852846
K00364	3359	2189	1000	0.27546				K00333	222	237	79.6	0.85905
K00366	539	598	86.8	0.520045				K00334	12760	9744	2705	0.29728
K00370	1270	252	525	0.0886				K00335	11520	8750	2415	0.284542
K00371	1270	252	525	0.0886				K00336	11190	9608	2132	0.479324
K00373	1270	252	525	0.0886				K00337	618	546	208	0.736966
K00374	1270	253	526	0.088997				K00338	615	545	207	0.74511
K00375	10520	10910	1294	0.770838				K00339	616	545	208	0.742649
K00378	9964	11770	1490	0.260166				K00340	616	545	208	0.742649
K00382	5143	5127	1085	0.988599				K00341	616	545	208	0.742649
K00383	1961	363	275	0.000399				K00342	616	545	208	0.743511
K00384	32440	33330	4705	0.854683				K00343	615	545	207	0.74511
K00385	1675	2490	1467	0.593767				K00344	238	363	195	0.539626
K00390	1577	531	478	0.060046				K00346	415	317	215	0.661627
K00394	5751	6284	2006	0.797225				K00347	420	317	217	0.649896
K00425	3478	3782	1393	0.83274				K00348	420	318	217	0.650415
K00426	3462	3701	1437	0.872029				K00349	420	317	217	0.649896
K00428	373	1265	381	0.047354				K00350	440	330	214	0.620411
K00432	3129	3360	1481	0.879898				K00351	419	317	217	0.652172
K00441	3125	5444	1883	0.253013				K00359	2195	1785	441	0.379772
K00520	347	245	107	0.368339				K00362	129	52.8	120	0.542591
K00525	6593	6193	1253	0.757752				K00364	3759	3408	1400	0.808318
K00526	4952	3453	967	0.159847				K00366	914	373	212	0.034223
K00527	20690	23460	2971	0.378376				K00370	1141	1226	444	0.853027
K00528	10500	12190	1495	0.291087				K00371	1141	1226	444	0.853027
K00533	2803	1060	679	0.033187				K00373	1141	1226	444	0.853027
K00537	15410	16180	4759	0.875477				K00374	1141	1226	444	0.852987
K00540	13690	13450	1250	0.852495				K00375	10360	9029	1946	0.513221
K00547	3224	2215	1018	0.350839				K00378	9876	8905	2104	0.656666
K00548	13220	15700	1750	0.194223				K00380	59.2	181	176	0.507951
K00549	1180	437	455	0.141382				K00381	63.8	181	176	0.523085
K00554	14510	14780	1634	0.872836				K00382	5682	7119	1326	0.310057
K00556	191	1282	407	0.028014				K00383	1454	1430	433	0.957109
K00557	46.4	145	32.5	0.015982				K00384	33200	27420	2637	0.059727
K00558	13790	13810	4495	0.996559				K00385	2206	4211	1322	0.167751
K00560	13160	13960	1764	0.662257				K00390	1656	1707	414	0.905031
K00563	4208	3387	1468	0.59136				K00394	4152	1689	1173	0.068961
K00564	2675	2662	977	0.989711				K00425	4474	4198	1431	0.851916
K00566	14790	16240	2034	0.49609				K00426	4444	4139	1428	0.836248
K00567	11110	13580	1678	0.17922				K00428	449	263	122	0.165552
K00568	198	211	92.2	0.896299				K00432	3409	5188	1547	0.283298
K00571	9439	7397	998	0.075057				K00441	2742	891	981	0.095959
K00573	203	209	56.2	0.917589				K00455	59	181	176	0.508082
K00574	5906	7643	2737	0.543433				K00459	175	158	77.3	0.839252
K00575	3404	3609	1593	0.900811				K00483	68.8	181	176	0.540546
K00595	15480	17410	3208	0.564129				K00484	59.2	181	176	0.508133
K00599	37690	36640	5417	0.851138				K00492	106	110	104	0.971617
K00600	14380	14650	1629	0.872489				K00507	175	160	76.9	0.848322
K00602	26630	28440	3405	0.609448				K00517	287	193	105	0.399861
K00603	1634	2556	1492	0.5539				K00520	571	286	114	0.037165
K00604	14420	14800	1778	0.836109				K00525	7895	8999	1408	0.455574
K00605	666	1678	407	0.037771				K00526	4836	3244	718	0.057515
K00606	2582	4373	1095	0.140567				K00527	21500	18940	2526	0.340574
K00609	14030	14640	1784	0.74124				K00528	10790	9334	2080	0.503771
K00610	8807	10910	1427	0.178744				K00532	178	77.6	96.1	0.327632
K00611	15450	15500	1326	0.970844				K00533	1898	1300	349	0.125073
K00615	29200	28160	3555	0.777289				K00537	15110	10060	2797	0.108653
K00616	8559	8309	2055	0.906191				K00540	16780	16770	803	0.990367
K00620	19710	20860	2331	0.635065				K00547	2648	1834	879	0.381435
K00625	14150	14230	1698	0.963581				K00548	14350	14400	3077	0.987434
K00626	11410	9722	2381	0.498439				K00549	807	602	283	0.488571
K00627	1487	522	399	0.042091				K00554	15360	13370	1103	0.108865
K00632	351	225	141	0.396083				K00556	306	276	197	0.883361
K00633	604	602	98	0.987376				K00557	166	291	240	0.615921
K00634	348	1344	376	0.029226				K00558	17230	20800	3694	0.36219
K00638	8644	10010	1102	0.250162				K00560	13580	12280	1028	0.241573
K00639	1078	2272	608	0.085192				K00563	4511	6146	1337	0.25608
K00640	11460	12680	1892	0.537124				K00564	3209	2945	946	0.787325
K00641	365	1243	378	0.048791				K00566	16100	13690	1330	0.107529
K00645	12610	12620	1430	0.994591				K00567	11860	10070	1415	0.241329
K00647	43.4	132	41.9	0.066474				K00568	293	520	350	0.533515
K00648	9499	7375	1169	0.106859				K00571	10300	11130	569	0.182736
K00651	13340	13030	1491	0.840479				K00573	270	399	175	0.481572
K00652	460	1523	383	0.024201				K00574	5393	2878	1411	0.11259
K00655	22990	24310	2733	0.642103				K00575	3859	5526	1369	0.258194
K00656	19540	23330	3605	0.323832				K00588	69.8	42.4	27.1	0.342002
K00657	1212	1798	552	0.319322				K00595	13840	10060	2920	0.231606
K00658	199	149	65.9	0.468316				K00598	432	139	120	0.041057
K00661	13390	13230	1681	0.926502				K00599	37830	31320	3180	0.074817
K00662	2100	2350	901	0.788461				K00600	14910	13060	1043	0.114084
K00666	775	584	117	0.14266				K00602	25560	21750	3415	0.296954
K00674	2281	1617	422	0.154468				K00603	2113	4365	1434	0.154944
K00675	430	285	142	0.335602				K00604	15280	13370	1169	0.140878
K00676	1255	1069	258	0.490901				K00605	973	862	198	0.592598
K00677	513	1597	396	0.025411				K00606	3068	5080	1396	0.187396
K00680	9448	10270	1948	0.684116				K00609	13690	11320	1606	0.178188
K00681	324	338	60.3	0.819807				K00610	8231	7461	1790	0.678468
K00684	464	137	221	0.17757				K00611	17450	18720	1096	0.280076
K00688	19140	20060	3929	0.820724				K00612	412	136	121	0.05226
K00689	1187	149	483	0.064053				K00613	214	106	78.4	0.2059
K00690	5519	4829	1839	0.71724				K00614	106	110	103	0.967108
K00691	2759	2118	1218	0.612949				K00615	32210	27150	4129	0.255211
K00692	1266	1927	917	0.491614				K00616	8601	5386	1508	0.065657
K00694	117	156	39.2	0.349421				K00620	19560	17540	3784	0.607934
K00700	17590	19090	3800	0.703374				K00625	14300	12560	1096	0.151136
K00702	851	502	336	0.329366				K00626	12120	15320	1645	0.087582
K00703	15070	18260	3359	0.370042				K00627	1447	1284	290	0.589386
K00705	15500	18050	3613	0.500356				K00631	59.6	181	176	0.509577
K00712	3786	499	1566	0.068983				K00632	303	534	353	0.530517
K00721	3905	7171	2305	0.194213				K00633	1034	605	241	0.11282
K00748	454	1506	382	0.024993				K00634	542	328	121	0.116628
K00754	14510	14030	1450	0.749187				K00638	8567	7838	1875	0.707632
K00756	5006	3739	1579	0.44557				K00639	1392	1037	330	0.314003
K00757	10430	12010	1690	0.377152				K00640	11370	9769	2275	0.501638
K00758	10.2	86	38.5	0.084814				K00641	421	255	117	0.194884
K00759	12490	13010	1358	0.711704				K00645	12200	10820	1807	0.466898
K00760	13580	11300	1102	0.072366				K00647	132	209	177	0.676246
K00761	14660	14720	1712	0.972903				K00648	9667	10270	1492	0.69669
K00762	19910	21250	3769	0.731381				K00651	12900	10730	1473	0.178985
K00763	15490	13760	1418	0.257155				K00652	656	546	219	0.629964
K00764	16330	19670	3640	0.38569				K00655	23230	20600	2659	0.351503
K00765	8523	9861	2429	0.596755				K00656	20600	17610	4442	0.519863
K00766	7166	8450	2405	0.607984				K00657	1407	1050	424	0.424512
K00767	7791	9130	2542	0.612653				K00658	261	349	183	0.642045
K00768	10820	10810	1015	0.992382				K00661	13390	12310	731	0.178005
K00773	12780	12720	1426	0.967466				K00662	4080	4129	1918	0.980242
K00782	1249	323	478	0.088781				K00666	1017	688	145	0.053021
K00783	14200	14660	1777	0.802313				K00674	1995	1825	419	0.695563
K00784	14010	16290	4965	0.658302				K00675	669	351	121	0.029912
K00786	4819	2092	866	0.01361				K00676	2227	1890	495	0.515348
K00788	17570	18630	3344	0.759389				K00677	742	579	237	0.510745
K00789	16530	17640	1171	0.370922				K00680	10960	13620	2175	0.256217
K00790	21760	23710	2640	0.481308				K00681	394	671	154	0.110894
K00791	14590	14760	1640	0.920006				K00684	361	372	197	0.956807
K00793	11570	13220	1600	0.332674				K00687	312	197	191	0.562898
K00794	11740	13350	1618	0.348815				K00688	17960	13280	3574	0.226744
K00795	18.2	168	76.6	0.085736				K00689	1070	1015	450	0.905774
K00796	8607	8551	2365	0.981686				K00690	6274	4702	2047	0.464514
K00797	9279	10350	1227	0.408027				K00691	3467	3240	1573	0.888847
K00798	9853	10760	1352	0.52114				K00692	1263	570	856	0.441496
K00799	412	422	126	0.94128				K00694	388	358	172	0.866952
K00800	11560	12520	1746	0.597469				K00700	16060	11700	3396	0.235157
K00803	449	421	114	0.80873				K00702	726	525	184	0.306516
K00805	13040	13030	1481	0.994779				K00703	14270	10800	2942	0.272021
K00806	14040	14670	1843	0.741276				K00705	15040	10930	3214	0.23688
K00811	259	1304	388	0.027237				K00712	3231	3136	1398	0.947501
K00812	1952	2710	1498	0.626388				K00721	3723	1527	1106	0.082252
K00817	11730	12550	1742	0.650464				K00748	630	538	214	0.677194
K00818	832	1413	404	0.188065				K00752	392	126	116	0.050756
K00820	13940	14550	1793	0.742514				K00754	17210	16180	2094	0.636085
K00821	24770	27730	4366	0.516964				K00756	5727	6859	1205	0.375017
K00823	1305	209	522	0.068881				K00757	9937	8514	2226	0.540442
K00826	11400	12410	1726	0.574622				K00758	62.2	183	177	0.514684
K00831	10990	12380	1923	0.490368				K00759	13550	11770	1213	0.180409
K00832	274	332	113	0.623068				K00760	14620	13830	796	0.34991
K00833	3628	6818	2332	0.208531				K00761	15370	13340	1114	0.105923
K00837	482	1334	375	0.052882				K00762	18600	13210	2717	0.082543
K00839	158	117	35.4	0.275276				K00763	16090	14320	905	0.086099
K00841	8524	4690	2882	0.220043				K00764	16070	12100	2661	0.17409
K00845	16920	19240	1287	0.109202				K00765	8308	5083	1769	0.105783
K00847	17160	17790	975	0.536336				K00766	6084	3392	1393	0.089332
K00848	4216	6642	2133	0.288319				K00767	6955	4134	1487	0.094424
K00849	13840	14280	1607	0.791228				K00768	10660	9592	1589	0.520507
K00850	36380	42430	6689	0.392138				K00769	60	181	176	0.509812
K00851	3723	2337	1554	0.398543				K00772	237	240	78.2	0.978259
K00852	8967	7604	1191	0.285615				K00773	12470	10860	1821	0.402311
K00853	1331	209	537	0.069862				K00782	1234	1250	413	0.970073
K00854	15300	18370	3064	0.345666				K00783	14980	13170	1193	0.167808
K00857	5998	5397	801	0.474728				K00784	12860	7923	2263	0.060669
K00858	14270	14670	1728	0.822759				K00786	3725	2545	682	0.121961
K00859	14240	14650	1726	0.818251				K00788	15280	11920	2875	0.276191
K00860	213	172	65	0.547673				K00789	18010	17890	1815	0.94891
K00863	1034	507	451	0.276731				K00790	22250	19930	2080	0.297173
K00864	14540	13640	1535	0.573835				K00791	15090	13120	968	0.076348
K00865	12590	12710	1531	0.939455				K00793	11800	10920	884	0.348439
K00867	3444	2289	1049	0.30276				K00794	12080	11540	855	0.545424
K00868	12320	12670	1975	0.86372				K00795	121	363	352	0.512362
K00869	3438	2207	1030	0.266265				K00796	7172	4394	953	0.019402
K00872	4906	5566	920	0.493525				K00797	9262	8650	1936	0.760039
K00873	14950	14940	1973	0.99608				K00798	10140	8965	1882	0.549807
K00874	16320	20160	2934	0.226937				K00799	558	920	521	0.506992
K00876	16180	18560	1071	0.056911				K00800	11300	9819	2188	0.517522
K00878	11280	10680	1284	0.65273				K00803	733	317	152	0.025465
K00879	571	269	247	0.256434				K00805	13710	12250	1064	0.207326
K00880	499	649	168	0.395469				K00806	14870	13080	1031	0.120673
K00882	11910	12730	1844	0.668294				K00811	386	166	120	0.102932
K00883	199	255	95.1	0.574799				K00812	2475	4473	1280	0.157118
K00891	20350	24390	5556	0.487833				K00813	64	181	176	0.523921
K00895	324	97.6	251	0.392613				K00817	11420	9892	2162	0.499814
K00901	3969	1872	422	0.001097				K00818	891	583	186	0.136495
K00903	19.8	88.6	37.9	0.106707				K00820	14890	13220	1009	0.136646
K00904	5960	4401	2303	0.517518				K00821	22810	18520	4792	0.396823
K00906	16.2	165	75.9	0.085387				K00823	1167	1071	448	0.835627
K00912	430	1420	424	0.048004				K00824	138	65.2	63.2	0.285085
K00917	1551	868	667	0.336042				K00826	11390	9710	2116	0.450124
K00918	391	478	135	0.538439				K00830	212	220	80.1	0.92862
K00919	12090	12620	1205	0.671608				K00831	10870	9387	2288	0.53509
K00925	17930	16950	2460	0.700797				K00832	287	304	185	0.927489
K00926	15860	17930	3766	0.597559				K00833	3385	1462	1075	0.111451
K00927	14670	14800	1668	0.939775				K00835	180	212	200	0.879845
K00928	18350	22040	4438	0.42981				K00837	535	304	143	0.143578
K00929	4529	4692	1335	0.905865				K00839	283	245	97.9	0.709401
K00930	20420	24090	3097	0.269994				K00841	8380	7256	3060	0.722934
K00931	12500	12410	1456	0.952215				K00844	363	181	199	0.387029
K00936	38860	37800	3149	0.745088				K00845	18470	16930	2565	0.564789
K00937	14550	17740	3176	0.344614				K00847	18250	18460	1358	0.880897
K00938	3438	2207	1030	0.266265				K00848	4810	2320	1400	0.11324
K00939	14670	14800	1668	0.939788				K00849	14390	12610	1010	0.116096
K00940	3135	2020	479	0.048291				K00850	36420	29760	6503	0.335719
K00941	24150	20510	1511	0.042529				K00851	3430	2805	1245	0.629284
K00942	17420	17070	2443	0.889613				K00852	12790	13940	1418	0.440702
K00943	9085	7846	721	0.124179				K00853	1137	1095	474	0.931607
K00945	30070	32110	5043	0.696436				K00854	16430	12160	3200	0.218873
K00946	639	2704	751	0.025086				K00855	60.4	182	176	0.508467
K00948	24490	23980	4429	0.911165				K00857	7159	8626	581	0.035632
K00949	13450	13160	1559	0.857026				K00858	14860	13050	1000	0.107923
K00950	2686	2162	454	0.281531				K00859	14830	13010	1000	0.10618
K00951	14860	16080	1938	0.54661				K00860	290	358	180	0.71622
K00952	158	158	43.6	>0.999999				K00863	710	337	275	0.212708
K00954	14710	14830	1663	0.944253				K00864	15900	14640	893	0.196117
K00956	5851	6463	2054	0.773299				K00865	13080	11970	899	0.252126
K00957	5931	6519	2060	0.782549				K00867	3835	3619	1356	0.877391
K00962	11900	12670	1783	0.677283				K00868	11840	9804	2011	0.34098
K00963	6733	6110	807	0.462165				K00869	3775	3440	1424	0.819896
K00965	15960	17950	3421	0.576772				K00872	5884	6671	1163	0.517548
K00966	465	470	90.7	0.957393				K00873	15650	13740	1249	0.164753
K00969	14110	14670	1690	0.748928				K00874	16640	14800	3817	0.642691
K00970	959	1458	607	0.43454				K00876	17680	17440	1778	0.895934
K00971	2318	4153	1148	0.148493				K00878	10380	9594	1869	0.685113
K00972	339	164	128	0.209443				K00879	793	418	210	0.112726
K00973	14890	19440	4063	0.295212				K00880	981	682	247	0.260588
K00974	38190	37190	5803	0.867468				K00882	12730	11360	1360	0.343399
K00975	30120	34330	6492	0.534812				K00883	291	311	167	0.90469
K00978	528	307	243	0.391099				K00884	59.6	181	176	0.509425
K00979	527	1502	428	0.052446				K00891	18490	13140	4136	0.231878
K00980	7251	8451	2651	0.662768				K00892	59	181	176	0.507306
K00981	14680	14880	1700	0.909234				K00895	241	75.2	126	0.22412
K00983	1310	394	404	0.053021				K00897	209	147	46.8	0.216306
K00986	3413	5705	1968	0.277633				K00899	122	113	24.8	0.703478
K00989	2276	2964	1372	0.629539				K00901	4167	3440	538	0.213313
K00991	11190	12500	1609	0.439044				K00903	68.6	184	176	0.532883
K00995	17700	17380	1349	0.818442				K00904	7679	6966	3094	0.823532
K00997	5842	3782	732	0.022723				K00906	118	362	352	0.507872
K00998	7437	9154	2398	0.494263				K00912	597	476	223	0.603366
K01000	14340	14700	1704	0.837965				K00917	1650	1199	432	0.326848
K01002	476	547	146	0.642135				K00918	512	249	132	0.081907
K01005	1109	379	531	0.206923				K00919	12140	10650	1665	0.396882
K01006	10780	12260	1480	0.346603				K00924	195	172	74.3	0.758815
K01007	1997	2497	910	0.597656				K00925	18210	15320	1216	0.044787
K01008	8589	9727	1405	0.44142				K00926	15400	12540	1612	0.113907
K01011	519	534	96.2	0.881538				K00927	15400	13400	1117	0.111185
K01012	16700	19020	3451	0.520323				K00928	17830	12820	2796	0.110929
K01026	2389	3095	1335	0.611193				K00929	4190	5690	1373	0.306323
K01042	864	770	253	0.71868				K00930	20730	18510	4139	0.606259
K01048	3657	5769	1949	0.310086				K00931	12120	10680	1769	0.439183
K01051	282	197	70.9	0.26671				K00932	59	181	176	0.508082
K01056	14680	14800	1668	0.944423				K00936	41270	42890	4571	0.732217
K01058	19.2	103	41.4	0.076401				K00937	14360	11080	2510	0.227631
K01060	579	609	124	0.818058				K00938	3775	3440	1424	0.819896
K01061	192	128	66	0.366414				K00939	15400	13400	1117	0.111219
K01066	304	177	73.3	0.122071				K00940	3734	3748	1180	0.990826
K01069	2215	3065	1556	0.599669				K00941	24770	24790	1101	0.985958
K01071	3435	2206	1031	0.267366				K00942	19060	17030	1481	0.207781
K01073	1185	160	485	0.067406				K00943	10730	11050	568	0.588872
K01076	279	321	127	0.748299				K00945	29100	23730	4126	0.229358
K01077	2291	4046	1194	0.179687				K00946	884	650	268	0.406964
K01079	868	387	464	0.33019				K00948	24590	19570	2316	0.062099
K01081	4686	5487	2164	0.720891				K00949	14000	12350	1092	0.169188
K01089	265	1459	450	0.028961				K00950	2403	2033	452	0.437172
K01090	17670	19280	3345	0.643179				K00951	15660	13420	1203	0.099647
K01091	28530	30800	4706	0.64244				K00952	217	108	48.5	0.055348
K01092	5789	7470	2284	0.482756				K00954	15450	13410	1134	0.109641
K01095	209	169	62.4	0.53968				K00955	121	111	41.1	0.824975
K01096	25.8	99	41.3	0.113914				K00956	4346	2017	1208	0.089945
K01101	3709	2453	1037	0.260276				K00957	4429	2078	1217	0.08944
K01104	40450	40650	7377	0.979036				K00958	175	159	76.8	0.840198
K01118	2987	2813	1625	0.917375				K00962	11900	10150	2275	0.463888
K01119	2634	2969	1573	0.836693				K00963	8756	10050	612	0.067532
K01126	14030	15530	2551	0.572754				K00965	15520	12360	1659	0.093252
K01129	12120	11420	2107	0.748231				K00966	591	456	119	0.292079
K01138	100	155	39.1	0.198177				K00969	14960	13120	1152	0.148854
K01139	638	718	200	0.699621				K00970	916	628	337	0.416292
K01142	15290	13620	1356	0.253213				K00971	3101	4862	1347	0.227381
K01144	2146	4108	1108	0.114637				K00972	219	239	79.7	0.811927
K01147	272	90	242	0.474725				K00973	13950	10300	2760	0.222597
K01151	14100	17790	3103	0.268498				K00974	38970	32940	3516	0.124645
K01153	17760	15470	1799	0.238881				K00975	28620	21700	6047	0.285578
K01154	21490	14460	1593	0.002247				K00978	940	345	334	0.112885
K01155	861	554	261	0.273845				K00979	1000	725	215	0.236752
K01159	3725	5089	1434	0.369392				K00980	6912	4120	1551	0.109524
K01160	16.4	165	76.1	0.086061				K00981	15460	13580	1070	0.116931
K01163	1719	1194	474	0.300192				K00982	63.6	185	177	0.514121
K01173	1948	280	274	0.000292				K00983	989	524	253	0.102959
K01175	3315	5673	1910	0.252003				K00984	517	169	188	0.10211
K01176	441	441	89.1	0.998264				K00986	3092	1071	1055	0.091826
K01179	7087	8285	3182	0.716362				K00989	2869	5040	1452	0.173313
K01181	1205	1248	374	0.911203				K00990	61.8	183	177	0.512593
K01182	17740	19290	5768	0.79495				K00991	11350	9872	2146	0.510428
K01183	531	391	347	0.696874				K00995	19550	19440	1996	0.957392
K01185	2735	1891	1114	0.470498				K00997	6360	4531	689	0.02913
K01186	281	1267	389	0.035116				K00998	7087	4249	1511	0.097183
K01187	15780	21400	4443	0.241461				K01000	14930	13100	1024	0.11186
K01188	8896	9264	2442	0.883953				K01002	592	292	150	0.0807
K01190	30910	38550	6683	0.285985				K01005	769	528	246	0.354855
K01191	7506	7235	2112	0.901087				K01006	10930	9264	2035	0.436653
K01192	6522	7892	2190	0.549044				K01007	3020	2804	1175	0.858726
K01193	19980	25280	6379	0.430183				K01008	7919	7588	1804	0.859011
K01195	1733	255	775	0.093042				K01011	706	1065	544	0.527718
K01197	195	136	69.9	0.429393				K01012	15160	11590	3025	0.271902
K01198	3302	1375	731	0.02996				K01026	2728	4538	1400	0.232256
K01200	2885	3101	1627	0.897642				K01029	54.8	145	40.4	0.05694
K01201	1029	525	464	0.309225				K01034	181	287	127	0.43312
K01205	195	1221	376	0.025733				K01035	105	109	103	0.970078
K01206	8016	15510	4937	0.167484				K01039	27.6	57.4	25.9	0.282291
K01207	8777	7093	1623	0.329863				K01040	28.2	57.4	26	0.293416
K01209	10520	10240	2593	0.916654				K01042	1122	933	327	0.578901
K01212	3342	5578	1962	0.287331				K01048	3486	1389	1054	0.081724
K01215	2163	2014	892	0.871415				K01051	366	347	104	0.864261
K01220	1349	318	495	0.070883				K01056	15400	13400	1117	0.111223
K01222	1133	429	500	0.197174				K01057	210	170	74.5	0.611027
K01223	18000	21190	4666	0.513496				K01058	81	191	178	0.556104
K01224	1740	597	383	0.017428				K01060	1147	624	233	0.055137
K01225	218	287	106	0.534636				K01061	234	340	182	0.576566
K01226	2238	2057	873	0.840961				K01066	357	326	221	0.891407
K01232	2137	2366	885	0.802432				K01069	3010	4980	1463	0.215014
K01234	2878	2260	1155	0.607115				K01070	59.8	182	176	0.507611
K01238	1481	2118	893	0.495911				K01071	3774	3436	1424	0.818395
K01239	6853	8302	2892	0.629798				K01073	1065	1035	440	0.947263
K01241	25.6	109	41	0.075149				K01076	292	188	57.3	0.108007
K01243	14090	14480	1683	0.822608				K01077	2934	4644	1371	0.247491
K01246	7281	9377	2958	0.498703				K01079	737	639	327	0.77135
K01247	24.2	112	34.1	0.033103				K01081	4298	2783	1630	0.379724
K01250	1612	596	538	0.095612				K01085	60	181	176	0.509993
K01251	928	1763	421	0.08269				K01089	496	507	379	0.977952
K01255	862	470	201	0.086816				K01090	17990	14000	2196	0.106697
K01256	2824	2286	1198	0.665237				K01091	27760	21900	5417	0.310875
K01258	11570	10720	1079	0.453422				K01092	5290	3112	910	0.043621
K01259	4715	4551	2103	0.939754				K01093	63.2	182	176	0.520483
K01262	16440	18620	2928	0.477838				K01095	290	459	161	0.324684
K01265	18930	22150	4105	0.455372				K01096	84.6	198	172	0.529839
K01266	286	278	95.6	0.930503				K01101	4014	3666	1376	0.806665
K01267	7149	7371	2288	0.925087				K01104	42350	35750	4505	0.181056
K01269	11730	11730	1746	>0.999999				K01112	59.4	181	176	0.508931
K01270	11450	12740	1548	0.42874				K01118	3218	5108	1543	0.255585
K01271	4770	3060	1094	0.156774				K01119	3021	4883	1457	0.237235
K01273	3862	4429	1468	0.709442				K01126	13110	10970	1781	0.263994
K01277	242	1288	384	0.026062				K01129	11480	9689	2263	0.45158
K01278	317	1400	400	0.026851				K01130	233	181	76.9	0.517952
K01281	3434	2205	1031	0.267366				K01138	370	300	191	0.725055
K01284	451	2534	766	0.026286				K01139	954	583	246	0.169752
K01286	5271	8261	1095	0.025779				K01141	64	181	176	0.523921
K01297	2015	2696	1516	0.665125				K01142	15560	13890	657	0.03461
K01299	651	412	161	0.176424				K01144	2706	4502	1316	0.20961
K01303	241	214	89.6	0.775877				K01146	59	181	176	0.507306
K01304	2733	2407	934	0.73597				K01147	184	212	199	0.8895
K01305	3511	5650	2007	0.317616				K01150	61	181	176	0.514631
K01308	445	458	143	0.930958				K01151	14040	10610	2877	0.267276
K01322	195	1219	379	0.027121				K01153	18580	16450	1221	0.119144
K01338	18810	21680	2408	0.267542				K01154	21080	18980	2186	0.364845
K01356	12920	12990	1358	0.960165				K01155	1294	769	197	0.028481
K01358	15320	15440	1796	0.948355				K01156	1474	1810	792	0.682474
K01361	1905	1964	961	0.952538				K01159	5175	6368	1392	0.416365
K01362	8384	8238	757	0.851779				K01160	118	362	352	0.508594
K01372	4099	3898	1298	0.880813				K01163	2044	1594	440	0.336464
K01376	1486	1925	915	0.644176				K01173	1394	1248	422	0.73853
K01409	16870	17950	1041	0.329639				K01174	8.4	24.4	17.7	0.392303
K01417	4113	3778	1770	0.854592				K01175	3224	1169	1043	0.084372
K01419	2003	2111	924	0.90987				K01176	996	871	196	0.539983
K01420	19300	22660	2605	0.23307				K01179	9956	13330	2869	0.27343
K01421	15380	12250	1879	0.134245				K01181	1345	972	265	0.19706
K01422	268	1327	343	0.015022				K01182	14450	7198	3334	0.061343
K01423	189	129	66.3	0.390155				K01183	663	454	313	0.523001
K01424	7229	7900	354	0.094524				K01185	2733	2756	868	0.979516
K01425	5543	6004	1134	0.694919				K01186	435	166	104	0.032028
K01428	3126	5383	1927	0.275288				K01187	15910	12320	1857	0.089237
K01430	3126	5383	1927	0.275288				K01188	8159	4346	1899	0.079504
K01433	304	132	248	0.506437				K01190	29710	22030	4657	0.137704
K01436	6197	8936	974	0.022769				K01191	6538	3475	1560	0.085129
K01438	460	1552	417	0.030587				K01192	5327	2253	1364	0.05424
K01439	18710	19120	3199	0.901174				K01193	20310	14700	2913	0.090332
K01442	10050	10790	3057	0.814789				K01194	59	181	176	0.508082
K01443	12920	13450	1550	0.741226				K01195	1993	2176	725	0.807137
K01444	280	239	99	0.691166				K01197	264	231	128	0.802621
K01447	8497	9312	3337	0.813206				K01198	2232	1776	408	0.296268
K01448	23900	28600	4567	0.333515				K01200	3231	5103	1586	0.271913
K01449	6201	9286	1095	0.02257				K01201	1508	678	549	0.169432
K01451	1995	2696	1491	0.650833				K01205	274	104	90.5	0.098441
K01462	27010	27310	3109	0.925507				K01206	8592	3616	2547	0.08649
K01463	1610	2510	1499	0.564912				K01207	8762	8376	1358	0.783392
K01464	8499	9616	1350	0.432103				K01209	9627	5848	2177	0.120766
K01465	14050	14670	1785	0.737281				K01210	281	323	104	0.703122
K01466	362	374	99.9	0.907314				K01212	3182	1195	1044	0.093521
K01467	6049	9009	3023	0.356157				K01215	2690	2383	1068	0.781026
K01468	93	214	36.3	0.010454				K01218	224	131	122	0.468784
K01470	5896	8810	1196	0.040783				K01220	2051	2295	719	0.743021
K01478	4032	2396	999	0.14012				K01222	1116	854	290	0.391839
K01479	48.8	154	30.6	0.008838				K01223	19970	15900	3347	0.258588
K01480	2944	4810	1071	0.119724				K01224	1536	1399	391	0.73515
K01482	473	257	118	0.10328				K01225	225	159	47.6	0.203302
K01485	2306	421	324	0.000398				K01226	3052	2510	1069	0.625854
K01486	8971	9935	1197	0.44397				K01232	3463	2815	1137	0.584356
K01487	3824	6026	2120	0.329358				K01234	3669	3508	1506	0.917473
K01488	3711	2801	1110	0.435948				K01238	1563	878	822	0.429208
K01489	11500	12530	1564	0.52865				K01239	8475	6546	1990	0.360812
K01491	29400	29910	3526	0.888586				K01241	94.4	192	179	0.598146
K01493	14460	14580	1675	0.944633				K01243	14680	12880	1067	0.130231
K01494	307	266	77.5	0.612762				K01246	6506	3355	1373	0.050818
K01495	9203	8648	2452	0.826598				K01247	104	311	177	0.274644
K01496	781	363	187	0.05632				K01250	1493	1316	433	0.693435
K01497	103	104	61.3	0.982346				K01251	1138	750	224	0.121187
K01500	222	298	108	0.499898				K01252	59	181	176	0.508082
K01501	3108	5365	1932	0.276404				K01255	1097	1002	186	0.623959
K01507	19460	19080	1621	0.820527				K01256	3657	3546	1459	0.941224
K01512	10170	9217	2770	0.739638				K01258	13320	13700	960	0.70243
K01515	14920	15340	2214	0.854292				K01259	5424	4219	2155	0.591438
K01516	15690	16670	2454	0.700095				K01261	312	198	191	0.563772
K01520	15110	15490	1855	0.842794				K01262	16710	13390	1998	0.135123
K01523	706	309	127	0.014159				K01265	19620	15220	2080	0.067263
K01524	23170	20490	4216	0.542782				K01266	604	297	200	0.162786
K01531	3993	5075	583	0.100623				K01267	5863	3182	1440	0.099603
K01533	14550	14920	1733	0.836315				K01269	11500	9886	2323	0.506822
K01534	35180	42820	6591	0.279803				K01270	10800	10010	1316	0.564933
K01537	17480	19640	1293	0.133335				K01271	6396	6039	1991	0.862147
K01546	950	1930	476	0.073739				K01273	5511	6973	1539	0.369866
K01547	950	1930	476	0.073739				K01274	266	112	146	0.321098
K01548	844	1900	471	0.055269				K01277	355	136	117	0.098873
K01551	293	401	122	0.401926				K01278	488	190	163	0.104593
K01552	12310	11920	3557	0.915394				K01281	3773	3436	1424	0.818921
K01560	3492	5771	1931	0.271831				K01284	649	247	209	0.090196
K01571	9331	10250	1296	0.498483				K01286	5650	5941	1519	0.852813
K01572	9983	11930	1196	0.142055				K01295	115	76.4	53.8	0.497766
K01575	1945	264	272	0.000267				K01297	2663	4427	1234	0.190767
K01577	1195	172	484	0.067241				K01299	849	608	195	0.249541
K01579	6676	8152	2476	0.567604				K01303	187	96.2	59.9	0.168574
K01580	476	1386	403	0.054063				K01304	3218	2794	1099	0.709709
K01581	2201	2415	821	0.801				K01305	3228	1203	969	0.07
K01582	2517	3199	1602	0.681452				K01308	744	563	211	0.416934
K01583	5030	8189	1074	0.018696				K01318	127	121	102	0.960506
K01585	431	1417	423	0.048146				K01322	259	99.6	82.4	0.08888
K01586	16890	19950	3755	0.438735				K01338	18920	16990	3900	0.634025
K01588	12780	12730	1433	0.973014				K01354	59.8	183	177	0.506748
K01589	3231	535	715	0.005446				K01355	59	181	176	0.508082
K01590	1180	148	485	0.065954				K01356	13860	12700	886	0.226965
K01591	13780	14630	1908	0.667711				K01358	16250	13930	1124	0.072959
K01595	2157	2171	991	0.989076				K01361	1437	653	787	0.348259
K01596	566	337	243	0.374771				K01362	10260	10640	546	0.506531
K01597	3438	2207	1030	0.266265				K01372	4630	3883	1415	0.611827
K01599	8602	12720	1699	0.041611				K01376	2378	2186	1229	0.879691
K01607	10430	11380	2891	0.750886				K01407	59	181	176	0.507306
K01608	43.4	113	35.1	0.081688				K01409	18860	18620	1863	0.900662
K01609	7157	8448	2403	0.605722				K01414	60.6	182	176	0.511311
K01610	8531	10560	3237	0.548252				K01417	4506	5895	1472	0.372913
K01611	2689	3385	1622	0.679217				K01419	2791	2600	1219	0.879341
K01613	8227	10660	3243	0.474605				K01420	19130	17170	2349	0.428325
K01615	2321	3106	1650	0.646967				K01421	14650	13290	1658	0.435857
K01619	7845	7315	1299	0.693923				K01422	454	244	154	0.210043
K01620	10590	11670	1743	0.552723				K01423	245	340	181	0.612828
K01621	2792	2145	1216	0.609003				K01424	8582	9257	1025	0.528806
K01623	910	801	157	0.506206				K01425	5786	7092	892	0.181322
K01624	23060	23840	3815	0.843091				K01426	633	445	264	0.496896
K01625	22000	25030	3562	0.419666				K01428	2764	855	1000	0.09275
K01626	11730	13070	4601	0.778295				K01430	2764	855	1000	0.09275
K01627	433	1425	426	0.048353				K01433	250	238	198	0.952456
K01628	7795	9952	1241	0.120303				K01436	7030	6713	1781	0.863138
K01629	3526	5817	1871	0.255552				K01438	734	490	241	0.338799
K01633	2611	1993	494	0.246253				K01439	19060	15040	1655	0.041225
K01636	3355	5633	1922	0.269961				K01442	9370	5634	1693	0.058343
K01639	8240	9627	1108	0.246067				K01443	13830	11600	1349	0.136919
K01641	3438	2206	1030	0.265906				K01444	336	152	85.3	0.063098
K01643	2140	2293	902	0.86954				K01446	114	134	109	0.861631
K01644	2344	2502	899	0.864784				K01447	8143	4964	1585	0.079841
K01646	1585	2034	862	0.616736				K01448	23220	19520	4964	0.477408
K01647	17710	19160	3395	0.680566				K01449	7650	7005	1756	0.722907
K01649	11920	12590	1752	0.71205				K01451	2492	4662	1474	0.179067
K01652	24660	27990	4148	0.44531				K01460	59	181	176	0.507306
K01653	10980	12260	1731	0.480671				K01462	28410	25370	1834	0.136053
K01654	1561	439	487	0.05032				K01463	2233	4263	1398	0.184675
K01657	7220	8428	2311	0.615283				K01464	7871	7189	1812	0.716424
K01658	6971	8377	2358	0.567439				K01465	13650	11290	1575	0.172449
K01659	164	199	65.2	0.6038				K01466	688	293	163	0.041972
K01661	1565	385	440	0.027723				K01467	6704	4047	1341	0.082955
K01662	14150	14940	1646	0.64418				K01468	230	450	258	0.419126
K01664	51	103	41.5	0.244093				K01470	6108	5839	1668	0.875845
K01665	469	1443	427	0.051839				K01478	4465	4057	1345	0.769372
K01666	2928	973	593	0.010914				K01479	169	313	252	0.582636
K01667	416	1593	471	0.037156				K01480	3784	5547	1418	0.24903
K01669	212	221	55.7	0.886681				K01482	621	264	104	0.008741
K01673	1000	334	366	0.106722				K01485	2743	3037	1161	0.806503
K01676	250	1371	418	0.027924				K01486	8739	7808	1814	0.621631
K01677	9654	10710	1297	0.43912				K01487	3531	1320	1139	0.088088
K01678	9061	10260	1389	0.413236				K01488	3873	3081	903	0.406057
K01679	3262	2365	1172	0.465966				K01489	12680	11490	1750	0.515623
K01681	11340	12360	1767	0.579573				K01491	30790	26830	2240	0.115029
K01685	2783	3109	1569	0.840629				K01492	291	177	111	0.332903
K01686	3762	4836	1331	0.442943				K01493	15130	12990	1197	0.111715
K01687	16290	20620	2657	0.141816				K01494	385	472	166	0.612542
K01689	15030	15220	1823	0.919578				K01495	7837	4823	933	0.01203
K01692	1811	545	623	0.076634				K01496	745	484	147	0.114813
K01693	10280	11060	1411	0.59551				K01497	78.8	214	172	0.45355
K01695	7873	8906	2250	0.658335				K01500	232	182	54.3	0.388119
K01696	9392	11330	1292	0.172008				K01501	2714	832	980	0.091166
K01698	7569	7045	1963	0.796311				K01507	20950	20310	2196	0.778138
K01699	1181	149	485	0.066225				K01512	9425	6635	1531	0.105816
K01703	28760	35430	6696	0.348382				K01515	15670	13470	1409	0.157059
K01704	28290	35010	6804	0.352262				K01516	16240	13800	1505	0.143527
K01709	521	304	242	0.397941				K01520	15990	13590	1193	0.079154
K01710	17570	21630	4044	0.34477				K01523	1018	712	188	0.141908
K01711	4611	7505	2099	0.205331				K01524	22950	19820	1565	0.080454
K01712	100	218	36.4	0.011773				K01525	60.4	181	176	0.512653
K01714	26450	30760	4797	0.39514				K01529	1507	1765	994	0.801679
K01715	5451	4246	1692	0.496666				K01531	5717	7323	451	0.007411
K01719	444	1497	379	0.024122				K01533	15300	13620	957	0.117326
K01726	1026	736	237	0.255337				K01534	35310	28260	6630	0.318674
K01733	13070	14470	1952	0.493686				K01537	19140	18330	1597	0.625753
K01734	12570	12350	1668	0.8983				K01546	1639	862	307	0.035294
K01735	11770	12500	1710	0.680652				K01547	1639	862	307	0.035294
K01736	11560	12520	1747	0.597672				K01548	1401	707	295	0.046641
K01737	998	1840	459	0.104137				K01551	456	279	97.7	0.107731
K01738	17600	17960	951	0.714764				K01552	13080	9473	2672	0.214011
K01739	918	300	415	0.174712				K01554	59	181	176	0.508082
K01740	23890	28920	4863	0.33125				K01560	3345	1091	1107	0.07604
K01744	3808	7193	2367	0.190481				K01567	113	111	105	0.979445
K01745	108	234	37.8	0.010395				K01571	8784	7748	1793	0.579336
K01749	7723	7473	2049	0.905879				K01572	10650	8915	2053	0.422683
K01750	822	610	227	0.376188				K01574	1155	1629	841	0.588361
K01751	3601	5840	2079	0.31295				K01575	1396	1244	421	0.727457
K01752	21660	23640	2954	0.521513				K01577	1067	1022	450	0.92284
K01754	11730	13270	2130	0.490242				K01579	5264	2587	1281	0.070109
K01755	12470	12450	1382	0.988805				K01580	628	412	238	0.392107
K01756	14680	14880	1699	0.909168				K01581	3493	3229	1137	0.822245
K01759	12200	13890	2304	0.484246				K01582	3814	5751	1453	0.219115
K01760	1624	315	638	0.07421				K01583	5228	5321	1515	0.952569
K01761	135	155	60.5	0.744839				K01584	59.2	181	176	0.508133
K01770	10290	12090	1598	0.292624				K01585	591	476	221	0.618052
K01772	1622	403	430	0.022005				K01586	16150	12110	2589	0.157249
K01775	14570	15100	1741	0.768571				K01588	12470	10770	1806	0.374046
K01776	13870	14300	1657	0.801768				K01589	2542	2480	844	0.943251
K01777	396	490	138	0.512827				K01590	1060	1012	447	0.917214
K01778	12830	14710	1823	0.332662				K01591	13570	11300	1678	0.213107
K01779	5125	5007	957	0.904869				K01595	1884	1181	708	0.34959
K01782	219	374	90.9	0.127335				K01596	958	428	273	0.088467
K01783	16670	17560	2425	0.72312				K01597	3775	3440	1424	0.819896
K01784	19250	21600	3585	0.530534				K01598	312	197	191	0.562898
K01785	14110	16060	2069	0.37353				K01599	10330	8601	2267	0.467525
K01786	9475	8088	2085	0.524692				K01601	174	158	77.2	0.846789
K01787	674	299	231	0.143493				K01607	11200	7451	1840	0.076024
K01788	6921	9159	1624	0.205543				K01608	132	203	173	0.690946
K01790	15490	20840	4128	0.231099				K01609	6089	3392	1391	0.088549
K01791	8895	8021	743	0.273576				K01610	7520	4170	1721	0.087426
K01795	412	402	108	0.928472				K01611	3855	5712	1309	0.193616
K01797	188	163	79	0.756195				K01613	7171	3810	1703	0.08392
K01802	1080	1625	417	0.227583				K01615	3624	5291	1326	0.244163
K01803	17600	15740	1671	0.297898				K01619	10040	10130	1505	0.95379
K01804	8477	11940	3945	0.405674				K01620	9825	8859	2161	0.666741
K01805	409	439	90.7	0.749345				K01621	3485	3274	1567	0.8962
K01807	5362	4563	1861	0.679019				K01623	998	797	231	0.408347
K01808	12200	13590	1688	0.434207				K01624	24460	18790	3078	0.102704
K01809	11050	13410	1579	0.173346				K01625	23040	19330	4167	0.399289
K01810	14630	14790	1681	0.926517				K01626	9533	5090	2571	0.122248
K01811	7585	8845	2278	0.595277				K01627	600	478	223	0.599601
K01812	3883	4791	1277	0.497415				K01628	8603	8029	1867	0.766306
K01813	620	725	140	0.475437				K01629	3531	1311	1102	0.078834
K01814	10500	12400	1573	0.261516				K01633	2262	1917	459	0.473824
K01815	2638	4267	1265	0.233726				K01635	825	479	516	0.521324
K01816	21.6	106	41.7	0.078097				K01636	3115	1265	991	0.098941
K01817	7062	8638	2477	0.542389				K01637	59.2	181	176	0.508133
K01818	3872	5946	2004	0.330914				K01638	59.2	181	176	0.508133
K01819	1673	289	948	0.182367				K01639	7892	6957	1717	0.600865
K01821	3446	2211	1031	0.265063				K01640	23.4	33.8	11.1	0.375963
K01823	3505	2405	1002	0.304038				K01641	3775	3440	1424	0.819896
K01825	32.2	330	152	0.086034				K01643	4131	4470	1701	0.846974
K01834	51750	48580	9561	0.748746				K01644	4398	4871	1678	0.785185
K01835	3971	2632	1059	0.241597				K01646	2596	2448	1133	0.899286
K01838	3988	2799	1226	0.360356				K01647	16320	11820	3160	0.192245
K01839	13400	11200	1362	0.144888				K01649	11920	9931	2047	0.359704
K01840	15580	19760	3694	0.290551				K01652	23510	19230	4209	0.339011
K01841	475	141	275	0.259167				K01653	10970	9512	2233	0.532149
K01843	279	133	43.5	0.01001				K01654	1226	636	256	0.050492
K01845	7573	7049	1965	0.796485				K01657	6079	3467	1293	0.078106
K01847	427	2491	753	0.025443				K01658	5851	2864	1411	0.067179
K01850	315	122	93	0.071196				K01659	242	379	161	0.418376
K01854	13370	13770	1795	0.829207				K01661	1475	1392	473	0.86509
K01858	98.8	128	23.8	0.259961				K01662	15010	13040	999	0.083961
K01866	14700	14800	1663	0.953524				K01664	203	261	198	0.777003
K01867	14670	14800	1669	0.939828				K01665	741	560	207	0.408109
K01868	14790	14860	1665	0.967502				K01666	1953	1104	362	0.047236
K01869	14680	14800	1668	0.944423				K01667	553	530	194	0.910879
K01870	14680	14800	1668	0.944423				K01669	272	422	188	0.448846
K01872	14530	14700	1645	0.920256				K01673	738	604	242	0.594817
K01873	14680	14800	1669	0.944452				K01676	415	318	216	0.663956
K01874	15150	14950	1745	0.911569				K01677	9864	8753	2052	0.602896
K01875	14680	14810	1661	0.939555				K01678	8733	7779	1819	0.6142
K01876	14790	14910	1662	0.944199				K01679	3936	3749	1524	0.905342
K01878	4063	2458	1061	0.168957				K01681	11070	9498	2149	0.485418
K01879	4063	2458	1061	0.168957				K01682	60.8	182	176	0.511778
K01880	10610	12340	1385	0.246917				K01684	528	258	178	0.165956
K01881	15050	15140	1628	0.957262				K01685	3730	5172	1301	0.299751
K01883	14680	14800	1669	0.944431				K01686	4518	5315	1390	0.58215
K01885	13400	15330	1877	0.333832				K01687	16850	14960	3731	0.626091
K01886	9412	11680	1435	0.15269				K01689	15750	13670	1208	0.123426
K01887	14690	14820	1663	0.939596				K01690	61.6	182	176	0.513033
K01889	14680	14800	1668	0.944423				K01692	1360	1199	464	0.737457
K01890	14680	14800	1668	0.944423				K01693	10360	9216	2067	0.595101
K01892	15650	14990	1664	0.701931				K01695	7193	4428	1467	0.096192
K01893	14210	14670	1624	0.784213				K01696	9105	8588	1883	0.790575
K01895	1366	918	351	0.237524				K01698	6146	3483	848	0.01379
K01897	10910	13420	1685	0.174672				K01699	1062	1013	448	0.915516
K01902	253	263	56.1	0.86578				K01703	27610	20620	5873	0.268075
K01903	253	263	56.1	0.86578				K01704	26530	19700	5628	0.259528
K01910	1599	2137	891	0.562642				K01706	85.8	38.8	49.1	0.366078
K01911	1366	368	515	0.088836				K01709	934	342	332	0.112567
K01912	9501	10130	2415	0.801119				K01710	17410	12880	2683	0.1298
K01914	13560	14310	1700	0.67077				K01711	4792	1941	1274	0.055569
K01915	30400	32190	4592	0.706846				K01712	237	452	258	0.428393
K01916	3517	2316	974	0.252571				K01714	26560	21100	4473	0.256986
K01918	6778	8211	2475	0.578552				K01715	5309	6965	1476	0.294357
K01919	3544	542	698	0.002619				K01716	59.8	181	176	0.510224
K01921	16300	17450	1187	0.361176				K01719	618	535	212	0.703959
K01923	12810	12720	1406	0.950517				K01720	165	291	239	0.612175
K01924	14270	14670	1728	0.822796				K01724	182	181	71.4	0.98268
K01925	14410	14770	1750	0.842172				K01726	1131	645	224	0.061805
K01926	13070	14060	1568	0.54543				K01727	218	143	125	0.565144
K01928	17320	16990	2474	0.897183				K01733	12710	10350	1923	0.254632
K01929	14270	14670	1728	0.822796				K01734	12070	10270	2504	0.492743
K01933	12640	12630	1411	0.99452				K01735	11400	9837	2163	0.490567
K01934	13800	13550	1222	0.843066				K01736	11320	9830	2191	0.515737
K01935	3679	6926	2376	0.208959				K01737	1209	923	276	0.329611
K01937	14640	14590	1574	0.975433				K01738	17900	17260	2055	0.763404
K01938	13880	14560	1846	0.722192				K01739	561	602	293	0.890009
K01939	14300	14780	1908	0.807698				K01740	22680	17990	4691	0.346734
K01940	12220	12450	1486	0.880812				K01744	3743	1583	1052	0.074212
K01941	154	118	31.4	0.28236				K01745	303	491	264	0.498486
K01945	12520	12710	1537	0.904668				K01746	144	259	131	0.404643
K01950	10630	12250	1487	0.307614				K01749	6570	4034	973	0.031357
K01951	14460	14920	1678	0.790939				K01750	1834	1999	794	0.840643
K01952	17030	15170	1751	0.319037				K01751	3549	1329	1041	0.065588
K01953	17620	15340	1841	0.250564				K01752	23180	21870	1633	0.445524
K01955	17290	17120	2413	0.945556				K01753	63.4	72	27.7	0.764389
K01956	16680	16720	2462	0.987433				K01754	11870	13160	3276	0.704042
K01958	200	138	42	0.175554				K01755	12240	10650	1757	0.392014
K01960	250	1295	385	0.026559				K01756	15440	13570	1065	0.117176
K01961	27910	29860	4938	0.703249				K01759	11660	9742	2352	0.438463
K01962	4588	3608	1534	0.54073				K01760	2364	2999	1192	0.608649
K01963	11220	10520	1295	0.603413				K01761	232	441	209	0.346097
K01972	14860	15190	1819	0.860586				K01766	59	181	176	0.507306
K01975	491	474	95.2	0.861108				K01768	582	315	364	0.484742
K01989	20370	19410	3142	0.767763				K01770	10320	9269	2052	0.622348
K01990	54330	56840	6685	0.717086				K01772	1546	1535	528	0.983883
K01991	492	1527	438	0.045753				K01775	15500	13650	1006	0.103273
K01992	34070	32660	3292	0.67973				K01776	14380	12670	818	0.069831
K01993	713	2813	845	0.037737				K01777	508	271	134	0.115624
K01995	7959	5798	1987	0.308392				K01778	12800	10920	1709	0.30328
K01996	7955	5795	1987	0.308617				K01779	6417	8008	767	0.0717
K01997	10840	11180	1653	0.842216				K01782	381	760	516	0.4834
K01998	10400	10790	1601	0.813727				K01783	17940	14650	1534	0.06435
K01999	10890	11120	1620	0.89063				K01784	21290	17500	1899	0.080989
K02000	75.6	201	41.6	0.016386				K01785	15660	13400	1218	0.100724
K02001	74.6	201	41.3	0.015268				K01786	8481	5554	1343	0.060862
K02002	44.4	142	32.8	0.017828				K01787	772	272	216	0.049011
K02003	108900	115600	17031	0.704306				K01788	7031	6812	1885	0.910366
K02004	79830	89150	11824	0.453297				K01790	15220	11010	3073	0.207965
K02005	10800	12420	1465	0.300882				K01791	10670	11610	783	0.264256
K02006	58360	54520	6585	0.575875				K01792	61.8	183	176	0.512904
K02007	7126	9259	1019	0.069757				K01795	768	596	215	0.448435
K02008	37690	34050	3093	0.273014				K01797	224	128	52.2	0.103109
K02009	1831	897	490	0.093048				K01802	1104	596	195	0.031416
K02010	1609	1283	318	0.335539				K01803	18390	15800	917	0.022332
K02011	1937	1359	531	0.308032				K01804	8140	3665	1955	0.05133
K02012	3876	3865	1760	0.995166				K01805	538	374	98.6	0.134732
K02013	24150	24910	2815	0.794015				K01807	5484	4438	1978	0.611351
K02014	2317	5736	1474	0.048975				K01808	13690	11200	2465	0.342033
K02015	26790	28410	2654	0.558545				K01809	12860	11830	840	0.25481
K02016	25310	27890	2086	0.251202				K01810	15370	13390	1113	0.113108
K02017	195	134	66.5	0.387463				K01811	7496	3927	1757	0.076717
K02018	10330	11100	1531	0.628626				K01812	4541	5548	1454	0.508294
K02019	552	295	170	0.169043				K01813	1186	628	290	0.090237
K02020	9387	10180	1471	0.60443				K01814	10730	9502	2115	0.577449
K02022	213	181	67.2	0.65263				K01815	3641	4859	1232	0.351774
K02023	2050	2188	819	0.87045				K01816	84.6	193	178	0.559407
K02025	99710	109000	20852	0.667748				K01817	6175	3323	1379	0.072417
K02026	91460	97670	17206	0.72751				K01818	3770	1386	1107	0.063375
K02027	68210	74000	15808	0.723659				K01819	1050	783	457	0.574204
K02028	37540	36120	6416	0.830387				K01821	3791	3457	1419	0.819871
K02029	32240	27500	2157	0.059268				K01823	3931	3713	1349	0.875668
K02030	48190	46070	6767	0.762087				K01825	236	724	704	0.508298
K02031	27580	32180	5026	0.386794				K01826	59.6	181	176	0.509395
K02032	28060	32040	5062	0.454397				K01834	55270	47100	6814	0.264838
K02033	30330	35600	4321	0.257371				K01835	4272	3901	1414	0.799631
K02034	28240	32640	5050	0.408975				K01838	4723	4260	1514	0.767537
K02035	38960	48430	6198	0.165075				K01839	12130	10480	1443	0.285984
K02036	16330	16710	2432	0.8797				K01840	15580	11620	3187	0.249182
K02037	14240	14600	1767	0.843685				K01841	525	372	213	0.493098
K02038	15100	14750	1883	0.857154				K01843	290	337	57.1	0.434058
K02039	14270	14650	1635	0.822059				K01844	59.8	240	84	0.064629
K02040	15500	15060	2041	0.834672				K01845	6180	3493	854	0.013705
K02041	2011	2482	891	0.611555				K01846	67.2	208	92.8	0.168947
K02042	4142	4805	1834	0.727134				K01847	615	237	207	0.104878
K02044	3709	4560	1791	0.647406				K01848	10.8	23	17.5	0.506482
K02045	3423	5564	2011	0.31815				K01849	10.8	23	17.5	0.506482
K02046	3423	5564	2011	0.31815				K01850	321	151	72	0.046075
K02047	3423	5564	2011	0.31815				K01854	13370	11980	1091	0.238592
K02048	3432	5649	2046	0.310106				K01858	170	59	48.9	0.053546
K02049	20360	21810	2791	0.617454				K01865	400	126	121	0.052291
K02050	25450	25760	3391	0.929409				K01866	15510	13440	1093	0.094962
K02051	17030	16350	2432	0.786886				K01867	15400	13400	1117	0.11105
K02052	50.2	122	36.1	0.081614				K01868	15530	13480	1140	0.109825
K02053	405	407	120	0.988432				K01869	15400	13400	1117	0.111223
K02054	42	110	34.8	0.088201				K01870	15400	13400	1117	0.111223
K02055	45	110	34.9	0.097422				K01872	15240	13210	1053	0.090095
K02056	21780	27370	4195	0.219428				K01873	15410	13410	1122	0.112413
K02057	43610	50560	6558	0.320202				K01874	15930	13750	1077	0.077621
K02058	7983	8229	2203	0.91385				K01875	15410	13490	1123	0.125756
K02065	452	1508	383	0.02474				K01876	15840	13790	1204	0.127088
K02066	634	1552	394	0.048158				K01878	4521	4153	1371	0.795151
K02067	211	218	55.1	0.893705				K01879	4521	4153	1371	0.795151
K02068	1452	2145	927	0.475914				K01880	10880	9246	2178	0.47455
K02069	1485	2187	920	0.467349				K01881	16020	13750	1242	0.105057
K02071	13110	13040	1306	0.958573				K01883	15400	13400	1117	0.111211
K02072	13480	13130	1235	0.783997				K01885	14440	14430	3093	0.9975
K02073	16720	15220	2331	0.537885				K01886	9420	8653	2040	0.716681
K02074	2767	2118	1216	0.60797				K01887	15420	13510	1128	0.128716
K02075	2767	2118	1215	0.607877				K01889	15400	13400	1117	0.111223
K02076	1322	208	518	0.063477				K01890	15400	13400	1117	0.111223
K02077	4035	4055	2078	0.992556				K01892	16520	14540	923	0.064266
K02078	32310	32540	4639	0.961675				K01893	14830	13100	1098	0.153876
K02081	690	614	170	0.665569				K01894	59.4	181	176	0.509556
K02082	1140	448	544	0.239157				K01895	1696	1238	248	0.101734
K02083	208	151	83.7	0.512162				K01897	10650	8894	1844	0.36879
K02086	3471	2244	1027	0.266551				K01902	338	423	176	0.642835
K02099	15400	20750	4769	0.294463				K01903	338	423	176	0.642835
K02102	3104	5362	1931	0.275845				K01910	2652	2635	1066	0.987662
K02103	5199	6249	1919	0.599185				K01911	1310	1298	417	0.977732
K02108	18110	20180	3800	0.600767				K01912	9483	5490	1564	0.034049
K02109	17910	20350	3681	0.526036				K01914	13930	12330	991	0.145184
K02110	19990	20890	3750	0.816343				K01915	30020	23960	3895	0.15831
K02111	17580	20200	3655	0.493874				K01916	3859	3540	1422	0.828137
K02112	20290	21180	3798	0.820599				K01918	5478	3068	1245	0.088872
K02113	17310	19790	3669	0.518151				K01919	2850	2652	888	0.829146
K02114	20240	21160	3811	0.815312				K01920	60.4	182	176	0.510663
K02115	20290	21180	3798	0.820599				K01921	17490	17590	1712	0.954853
K02116	262	175	80.1	0.307772				K01922	352	210	192	0.479836
K02117	10290	12390	1379	0.166298				K01923	12370	10710	1743	0.368714
K02118	10780	12580	1495	0.262863				K01924	14860	13050	1000	0.107795
K02119	9386	10890	1296	0.279439				K01925	15020	13240	1067	0.133857
K02120	10320	12490	1475	0.179377				K01926	13540	12000	1024	0.17103
K02121	10010	11960	1398	0.200438				K01928	18360	16450	1429	0.218107
K02122	9916	11140	1438	0.419415				K01929	14860	13050	1000	0.107923
K02123	10020	12440	1536	0.153681				K01932	106	109	103	0.976023
K02124	10520	12580	1528	0.214599				K01933	12320	10590	1762	0.355
K02160	14500	15880	2865	0.642949				K01934	14930	13200	973	0.113275
K02168	19.8	181	69.7	0.048921				K01935	3467	1666	1095	0.138491
K02169	203	1304	410	0.027818				K01937	15320	13380	1028	0.095777
K02188	9858	10010	1132	0.896503				K01938	14600	12770	1102	0.135247
K02189	9892	9995	1120	0.92899				K01939	14900	13210	1129	0.172628
K02190	7410	9073	1073	0.15982				K01940	12120	10630	1813	0.434927
K02191	1261	165	487	0.054608				K01941	201	198	89.4	0.977513
K02192	137	114	88.2	0.80415				K01945	12340	10720	1850	0.406845
K02193	9.6	86	39.3	0.087827				K01950	10860	9328	2018	0.469596
K02194	240	128	91.4	0.255416				K01951	15360	13210	1083	0.082325
K02195	239	125	90.9	0.248288				K01952	17260	15310	858	0.052573
K02197	240	128	91.4	0.255416				K01953	17550	14840	1569	0.122359
K02198	240	128	91.5	0.258671				K01955	17940	15030	1390	0.069663
K02200	8.8	85	38.4	0.082368				K01956	16900	14400	1212	0.072975
K02203	11100	12660	4051	0.710175				K01958	201	172	43.3	0.521713
K02217	3320	5007	1326	0.239087				K01960	376	154	121	0.103373
K02221	4628	2793	951	0.08982				K01961	27020	22640	3043	0.188002
K02224	18630	18150	2817	0.868939				K01962	5356	7323	1447	0.211145
K02226	10790	10990	991	0.845112				K01963	10710	9997	1771	0.697729
K02227	10380	10510	1107	0.909376				K01971	483	433	93.4	0.604176
K02231	19840	20240	2054	0.850447				K01972	15700	13690	1158	0.120743
K02232	10160	10220	1108	0.958129				K01975	719	646	121	0.564685
K02233	10410	10520	1105	0.923157				K01989	18020	13300	2380	0.082674
K02236	6988	4495	2046	0.257703				K01990	58530	50990	5056	0.174256
K02237	11820	10490	2827	0.650585				K01991	707	525	248	0.486371
K02238	18390	22180	2630	0.187495				K01992	34440	30990	3035	0.288537
K02240	3711	2458	1044	0.264344				K01993	1049	856	442	0.673727
K02241	539	346	330	0.57625				K01995	8062	8456	1744	0.826921
K02242	3466	2233	1021	0.261595				K01996	8053	8439	1738	0.829773
K02243	3710	2458	1044	0.264695				K01997	10800	9669	2269	0.631596
K02244	4075	2233	1026	0.110213				K01998	10250	8974	2251	0.586437
K02245	3710	2459	1044	0.265157				K01999	10790	9745	2143	0.638953
K02246	3434	2205	1031	0.267366				K02000	224	509	245	0.278841
K02248	3352	2185	1000	0.276831				K02001	224	509	245	0.279649
K02278	3478	5762	2007	0.288052				K02002	128	416	168	0.126555
K02279	2377	2994	1439	0.679418				K02003	106200	87020	16277	0.272523
K02282	432	110	148	0.061218				K02004	80330	67260	9977	0.226534
K02283	10140	11060	1574	0.57489				K02005	10040	8900	1752	0.533492
K02301	205	209	56.7	0.953688				K02006	59430	50600	5027	0.11706
K02302	638	506	211	0.550109				K02007	7623	7474	1235	0.906928
K02304	17800	17310	2679	0.859412				K02008	39540	35510	2654	0.167326
K02313	14680	14810	1661	0.939555				K02009	2056	1478	377	0.163655
K02314	15290	15250	1613	0.980823				K02010	2312	2054	444	0.577445
K02315	17970	20030	2370	0.410138				K02011	2593	2190	438	0.384167
K02316	14670	14800	1669	0.939824				K02012	4910	6466	1500	0.329867
K02334	8159	8840	2301	0.774814				K02013	23370	20430	3387	0.410633
K02335	14690	14800	1666	0.948989				K02014	3672	3973	1883	0.87699
K02337	15390	14970	1884	0.829138				K02015	27120	26090	4673	0.831072
K02338	15310	14850	1885	0.813308				K02016	26030	25420	4430	0.893881
K02340	12660	11890	3014	0.804805				K02017	256	360	179	0.578658
K02341	14330	14680	1838	0.853698				K02018	10170	9045	2064	0.600641
K02342	7589	9952	1226	0.090048				K02019	803	622	269	0.519945
K02343	14630	14730	1672	0.953782				K02020	8650	7973	1813	0.718507
K02346	13030	13570	1894	0.782776				K02022	277	353	184	0.689045
K02348	3373	417	760	0.004631				K02023	3268	2819	1210	0.720113
K02355	25430	26970	2877	0.607027				K02025	100100	63540	19703	0.100613
K02356	16260	16900	2339	0.791274				K02026	93330	60850	17694	0.103738
K02357	14680	14800	1669	0.944431				K02027	67170	42610	11636	0.067795
K02358	14890	14860	1674	0.986141				K02028	37750	31200	3301	0.082476
K02361	65.2	172	51.3	0.071809				K02029	34240	34030	1188	0.864044
K02371	7337	6291	1603	0.53228				K02030	49780	43150	3165	0.06947
K02372	14570	13080	1372	0.309181				K02031	28510	23230	4522	0.276583
K02377	3864	6738	2250	0.237226				K02032	28880	23620	4206	0.24646
K02379	3349	5503	1986	0.309777				K02033	31840	28120	4977	0.476178
K02380	15.8	87.4	39.2	0.105398				K02034	29520	23740	4403	0.225696
K02385	2309	2944	1474	0.678003				K02035	42050	37640	5535	0.448568
K02387	2652	3080	1429	0.772231				K02036	16780	14230	1400	0.106014
K02388	2388	3075	1377	0.631257				K02037	14680	13030	1004	0.138759
K02389	2383	3065	1374	0.63304				K02038	15340	13480	1296	0.189032
K02390	1105	658	342	0.228427				K02039	14960	13160	1156	0.157993
K02392	6506	4873	1778	0.38514				K02040	15780	13760	1172	0.123018
K02393	9.8	86.2	39.4	0.088613				K02041	3125	2889	1201	0.84913
K02394	187	130	66.8	0.418352				K02042	6111	5637	2348	0.845071
K02395	555	548	215	0.975586				K02044	5718	5305	2457	0.870683
K02396	3825	1696	605	0.007847				K02045	2953	1230	1024	0.131035
K02397	847	519	358	0.386013				K02046	2953	1230	1024	0.131035
K02398	830	514	353	0.396141				K02047	2953	1230	1024	0.131035
K02400	2614	3033	1422	0.775788				K02048	3014	1411	1040	0.16195
K02401	800	550	319	0.45557				K02049	20380	17510	4004	0.493853
K02404	561	414	193	0.468673				K02050	25440	23830	5182	0.763995
K02405	2410	3089	1377	0.635093				K02051	17450	16780	3445	0.85064
K02406	9690	6046	1978	0.10276				K02052	199	254	203	0.793133
K02407	3408	1502	597	0.012737				K02053	755	484	230	0.27227
K02408	2648	3079	1428	0.770496				K02054	185	230	187	0.816228
K02409	2637	3054	1424	0.777083				K02055	186	230	187	0.818657
K02410	2652	3080	1429	0.772231				K02056	22690	18530	3866	0.31333
K02411	2120	2856	1446	0.624552				K02057	44070	37480	6909	0.368122
K02412	2499	3077	1426	0.695883				K02058	7241	3941	1721	0.091405
K02413	2417	2982	1441	0.705149				K02062	59.8	181	176	0.510224
K02414	327	202	134	0.377231				K02063	188	212	200	0.90604
K02415	490	149	232	0.179462				K02064	191	214	200	0.911393
K02416	2648	3079	1428	0.770496				K02065	630	538	214	0.679517
K02417	2716	3099	1450	0.798302				K02066	807	697	246	0.666556
K02418	854	523	358	0.382525				K02067	272	402	177	0.486416
K02419	2652	3080	1429	0.772231				K02068	1613	1062	763	0.490639
K02420	2611	3033	1421	0.774045				K02069	1675	1088	774	0.470022
K02421	800	550	319	0.45557				K02071	13530	12380	1055	0.307425
K02422	5111	4028	1576	0.511369				K02072	13910	12630	1070	0.265731
K02426	263	1456	453	0.030174				K02073	16650	15180	1141	0.233645
K02427	274	90.2	246	0.476797				K02074	3463	3242	1573	0.891724
K02428	920	1462	464	0.276486				K02075	3463	3242	1573	0.891724
K02429	1763	2830	950	0.293718				K02076	1317	1217	472	0.837569
K02431	3877	5871	2041	0.357139				K02077	4695	3809	2194	0.696935
K02433	22780	22300	3707	0.900162				K02078	31590	25520	3788	0.147727
K02434	22400	21890	3850	0.897897				K02079	59	181	176	0.508082
K02435	21950	21630	3820	0.935298				K02081	895	671	235	0.367308
K02437	1896	1857	691	0.956393				K02082	936	737	347	0.58116
K02438	9493	8162	2492	0.607853				K02083	194	126	41.1	0.140882
K02439	3110	5443	1965	0.269064				K02086	3813	3556	1406	0.859498
K02440	5039	2655	1052	0.053267				K02099	14030	9289	3464	0.208342
K02441	156	187	63.5	0.631974				K02102	2710	832	983	0.092535
K02443	813	680	224	0.567216				K02103	5366	2824	914	0.023923
K02444	3467	5740	2024	0.294084				K02108	17930	14060	2247	0.123372
K02445	132	171	43.3	0.396458				K02109	18230	14470	2187	0.123909
K02446	25.4	117	35.6	0.032578				K02110	19060	14800	2394	0.113102
K02453	187	130	67.2	0.422449				K02111	17880	14120	2132	0.115743
K02454	189	133	67.1	0.428074				K02112	19400	15090	2393	0.109411
K02456	468	159	208	0.17627				K02113	17620	13970	2151	0.128099
K02469	23440	24890	2853	0.625008				K02114	19380	15070	2389	0.10891
K02470	24130	24960	3128	0.797464				K02115	19400	15090	2393	0.109411
K02471	13.8	89.6	39.6	0.091837				K02116	328	408	173	0.65612
K02472	44.2	141	39.8	0.040404				K02117	10470	8750	2051	0.4261
K02474	223	1252	380	0.0267				K02118	10800	9053	2134	0.436702
K02477	3932	6919	2375	0.244054				K02119	9582	8327	2026	0.552937
K02478	11.8	93.6	40.2	0.076104				K02120	10510	8917	2144	0.478823
K02481	415	1330	384	0.044561				K02121	10080	8579	2005	0.475592
K02483	4569	5700	1865	0.561				K02122	10090	8734	2179	0.551056
K02484	240	1271	383	0.027307				K02123	10230	8790	2122	0.516592
K02492	7540	7016	1964	0.796343				K02124	10680	9023	2175	0.468078
K02493	14530	14740	1664	0.902698				K02160	13660	10880	2360	0.272705
K02495	21060	23330	2980	0.468052				K02167	59	181	176	0.507306
K02499	2148	2866	1408	0.623898				K02168	133	455	337	0.367925
K02500	10940	12600	1480	0.294464				K02169	341	286	205	0.79263
K02501	10720	12570	1428	0.231403				K02170	59.4	181	176	0.508931
K02502	8322	8444	2090	0.954889				K02173	247	152	108	0.405143
K02503	14410	14710	1748	0.867989				K02188	9086	8329	1475	0.621579
K02505	9.8	85.2	38.7	0.087309				K02189	9089	8352	1468	0.629228
K02507	10.8	87.8	39.2	0.085265				K02190	7889	7510	1283	0.775141
K02509	2565	475	1027	0.076254				K02191	1096	1047	445	0.915
K02510	207	312	56.4	0.099342				K02192	412	371	202	0.842755
K02517	443	1434	429	0.049661				K02193	62.8	182	176	0.518027
K02518	14580	14710	1665	0.939686				K02194	279	302	225	0.923266
K02519	14630	14750	1667	0.944386				K02195	278	301	225	0.919905
K02520	14230	14560	1809	0.859766				K02197	279	302	225	0.923266
K02523	709	1503	445	0.111926				K02198	279	302	225	0.922549
K02525	1477	231	519	0.043023				K02199	59.8	181	176	0.509347
K02526	643	618	158	0.877553				K02200	60.4	182	176	0.510511
K02527	430	1420	424	0.048004				K02203	8865	4155	2152	0.06004
K02528	14670	14800	1668	0.939797				K02217	4925	6184	1458	0.41296
K02529	64880	59170	6307	0.39175				K02221	4949	4473	1369	0.737075
K02530	960	221	523	0.195242				K02224	17100	13060	2357	0.124837
K02532	57.6	111	49.9	0.314481				K02226	11040	9597	1647	0.40661
K02533	454	135	217	0.180618				K02227	9706	8791	1433	0.540937
K02535	451	1506	382	0.024692				K02231	18780	17140	2827	0.577857
K02536	559	1551	388	0.033819				K02232	9483	8631	1419	0.564734
K02547	5914	6723	2091	0.708971				K02233	9780	8838	1442	0.531884
K02548	7769	7920	3408	0.96575				K02236	7712	7042	2783	0.815836
K02549	145	171	61.6	0.683974				K02237	11620	8358	1545	0.067674
K02551	587	1426	472	0.113595				K02238	19450	17860	2262	0.501968
K02552	23.4	88.6	38.2	0.12657				K02240	3999	3652	1371	0.806561
K02556	2559	3065	1451	0.736232				K02241	531	308	158	0.19553
K02557	5820	9734	1219	0.01241				K02242	3907	3588	1416	0.827412
K02558	19.2	104	41.7	0.075933				K02243	3996	3649	1369	0.806358
K02563	14270	14680	1722	0.817758				K02244	3976	3522	1327	0.741103
K02564	14140	15740	2038	0.454987				K02245	3998	3650	1371	0.806052
K02566	262	257	76.3	0.943319				K02246	3773	3436	1424	0.818921
K02567	232	124	90.8	0.268517				K02248	3755	3402	1399	0.807154
K02568	232	123	90.5	0.262244				K02274	204	218	80.2	0.869554
K02570	236	124	90.5	0.250196				K02275	208	217	79.6	0.912738
K02573	232	124	90.8	0.268517				K02276	174	159	77.2	0.84875
K02574	3567	5526	2005	0.357081				K02278	3124	1194	1064	0.107232
K02575	1503	294	450	0.027725				K02279	3053	4829	1435	0.251005
K02585	235	313	104	0.480903				K02282	501	342	152	0.325064
K02586	300	366	118	0.590389				K02283	9534	8571	2126	0.662581
K02587	479	606	217	0.573284				K02291	189	189	101	>0.999999
K02588	8696	10120	1220	0.276649				K02297	59.4	181	176	0.508931
K02589	408	427	135	0.890571				K02298	59.4	181	176	0.508931
K02590	408	427	135	0.890571				K02299	59.4	181	176	0.508931
K02591	518	653	224	0.561104				K02300	59.4	181	176	0.508931
K02592	243	304	110	0.59222				K02301	263	398	176	0.46399
K02594	287	309	126	0.860415				K02302	688	1101	472	0.407179
K02598	3240	5419	1924	0.290225				K02303	204	217	80.2	0.871406
K02600	14680	14800	1668	0.944423				K02304	16270	12380	2056	0.095123
K02601	16720	15630	1675	0.533345				K02313	15410	13490	1122	0.125279
K02614	852	587	270	0.355267				K02314	16450	14080	1235	0.091349
K02619	275	1376	418	0.03009				K02315	18100	16870	3071	0.699227
K02621	4650	3967	1193	0.582766				K02316	15400	13400	1118	0.111477
K02622	5290	3995	1167	0.299267				K02334	9944	12290	1793	0.227061
K02647	17520	18280	3062	0.810251				K02335	15530	13440	1098	0.093483
K02650	682	494	129	0.182554				K02336	59.2	181	176	0.508133
K02652	1358	767	387	0.165452				K02337	15780	13570	1162	0.093713
K02653	3680	4086	1670	0.814039				K02338	15590	13570	1220	0.136247
K02654	16220	19760	2563	0.204616				K02339	59.8	181	176	0.510224
K02662	1030	803	240	0.373418				K02340	12740	8853	1635	0.044751
K02669	4870	2647	721	0.015084				K02341	15200	13280	1153	0.134532
K02687	13320	14310	1725	0.581895				K02342	10510	11580	1532	0.504769
K02744	1791	855	603	0.159045				K02343	15220	13180	1019	0.080189
K02745	1340	621	590	0.257427				K02344	59.6	181	176	0.509577
K02746	1340	621	590	0.257427				K02345	59	181	176	0.507306
K02747	1340	621	590	0.257427				K02346	14430	12280	1492	0.187446
K02750	1690	2082	886	0.669747				K02348	3833	3949	1685	0.946817
K02757	15090	17280	3187	0.511368				K02355	26280	22570	2910	0.238119
K02759	6573	6031	1252	0.676441				K02356	17930	15820	1289	0.140183
K02760	7283	6409	1414	0.553734				K02357	15400	13400	1117	0.111107
K02761	15450	16600	4304	0.796079				K02358	15620	13600	1103	0.104391
K02765	7298	8808	1154	0.227028				K02361	168	223	182	0.771019
K02768	1269	564	544	0.2315				K02363	59	181	176	0.507306
K02769	921	404	480	0.312943				K02371	7335	8202	1899	0.660177
K02770	12000	12710	1745	0.694707				K02372	13770	12000	1084	0.141056
K02773	2229	2590	929	0.707569				K02377	3476	1130	978	0.043264
K02774	1194	808	298	0.23095				K02379	3002	1147	941	0.084292
K02775	1911	675	427	0.020069				K02380	75.6	200	175	0.497193
K02777	3972	4363	1896	0.841728				K02385	2920	4719	1326	0.211882
K02779	2065	549	901	0.130779				K02386	63	182	176	0.518049
K02781	1374	2075	889	0.452892				K02387	3170	5083	1392	0.206766
K02783	469	504	101	0.739004				K02388	3046	5051	1416	0.194591
K02786	1141	242	436	0.073335				K02389	2986	5015	1401	0.185516
K02788	1943	304	900	0.10599				K02390	1127	974	254	0.564284
K02791	1770	2586	1429	0.583734				K02391	59.2	181	176	0.508133
K02793	9728	11440	3857	0.668894				K02392	6615	7829	1479	0.435621
K02794	12170	12710	4089	0.898204				K02393	63.2	182	176	0.518414
K02795	9116	7347	2381	0.478794				K02394	236	339	182	0.584993
K02796	11350	12240	4021	0.830392				K02395	520	586	215	0.767737
K02798	1350	2130	904	0.413366				K02396	2839	2036	357	0.054706
K02800	1614	2350	923	0.448039				K02397	783	669	238	0.64532
K02804	434	506	154	0.651816				K02398	761	655	231	0.660297
K02805	3555	5535	1929	0.334829				K02399	59.2	181	176	0.508133
K02806	464	149	217	0.1845				K02400	3006	4984	1380	0.189532
K02810	10820	12690	2712	0.510051				K02401	958	779	251	0.49426
K02819	749	213	416	0.233949				K02402	59.2	181	176	0.508133
K02821	1202	496	523	0.214402				K02403	59.2	181	176	0.508133
K02822	1978	574	954	0.179093				K02404	552	436	121	0.367858
K02823	11020	12330	1850	0.499096				K02405	3075	5083	1424	0.196153
K02824	10060	7455	898	0.019852				K02406	8427	8993	1615	0.734993
K02825	5639	4805	1939	0.67843				K02407	2324	1650	327	0.07329
K02834	14680	14800	1668	0.94441				K02408	3166	5081	1393	0.206501
K02835	14680	14800	1668	0.944423				K02409	3078	5035	1381	0.194239
K02836	14010	14660	1851	0.734569				K02410	3170	5083	1392	0.206766
K02837	13020	14060	1795	0.578171				K02411	2557	4581	1409	0.18884
K02838	14680	14800	1668	0.944423				K02412	3163	5074	1391	0.206656
K02839	13.6	86.8	38.5	0.093609				K02413	2800	4805	1410	0.192956
K02840	1496	181	607	0.062081				K02414	346	433	176	0.633475
K02843	209	222	55	0.810871				K02415	507	450	258	0.82973
K02852	21.2	106	42	0.079218				K02416	3166	5081	1393	0.206501
K02858	102	104	61.3	0.977286				K02417	3191	5104	1400	0.208994
K02859	2756	2116	1218	0.613588				K02418	801	677	236	0.612965
K02860	15240	14710	1953	0.792923				K02419	3170	5083	1392	0.206766
K02863	14680	14800	1668	0.94441				K02420	3000	4982	1379	0.188628
K02864	14130	14690	1720	0.75306				K02421	958	779	251	0.49426
K02867	14680	14800	1668	0.944423				K02422	4592	5865	1434	0.400696
K02871	14630	14740	1665	0.948941				K02423	59	181	176	0.507306
K02874	14670	14800	1669	0.939819				K02425	59	181	176	0.507306
K02876	14640	14750	1669	0.949058				K02426	478	502	375	0.95101
K02878	14680	14800	1668	0.944423				K02427	187	213	201	0.900415
K02879	14620	14760	1665	0.935042				K02428	922	607	264	0.267541
K02881	14420	14790	1777	0.840296				K02429	1865	1507	421	0.42001
K02884	14680	14800	1668	0.944423				K02430	59	181	176	0.508082
K02886	14680	14800	1668	0.944423				K02431	3773	1397	1131	0.068856
K02887	14420	14780	1780	0.844735				K02433	24040	19290	2331	0.075905
K02888	14630	14800	1673	0.921546				K02434	22930	18280	2183	0.06577
K02890	14680	14800	1668	0.944423				K02435	22370	17820	2074	0.059551
K02892	14680	14800	1668	0.944423				K02436	235	149	106	0.441287
K02895	14410	14790	1778	0.836128				K02437	1987	1881	404	0.799516
K02897	4312	7356	2329	0.227512				K02438	7193	4053	1586	0.083126
K02899	14640	14770	1662	0.939573				K02439	2766	1011	972	0.108775
K02902	14170	14530	1607	0.828383				K02440	5934	6008	1958	0.97078
K02904	14670	14800	1669	0.93981				K02441	227	370	161	0.399101
K02906	15320	14830	1883	0.801273				K02443	1273	897	289	0.228575
K02907	13860	14250	1718	0.826135				K02444	3201	1197	1022	0.085521
K02909	14690	14890	1692	0.908835				K02445	208	331	230	0.60538
K02911	14420	14660	1602	0.884608				K02446	96.6	317	179	0.252526
K02913	16720	17110	2217	0.864735				K02452	59.2	181	176	0.508033
K02914	14190	14620	1754	0.812497				K02453	243	339	181	0.608829
K02916	14430	14790	1773	0.844203				K02454	236	341	182	0.58073
K02919	9129	11000	1106	0.129301				K02455	59.8	181	176	0.509942
K02926	14680	14800	1668	0.94441				K02456	388	397	191	0.96277
K02931	14380	14690	1612	0.852258				K02457	59.2	181	176	0.508033
K02933	14680	14800	1668	0.94441				K02458	59.2	181	176	0.508033
K02935	14680	14800	1668	0.944423				K02459	59.2	181	176	0.508033
K02939	14680	14800	1668	0.944423				K02460	59.2	181	176	0.508033
K02945	11610	11080	3121	0.869364				K02461	59	181	176	0.508082
K02946	13930	14630	1782	0.704643				K02462	59	181	176	0.508082
K02948	14670	14800	1669	0.939819				K02464	59.4	181	176	0.509374
K02950	14640	14750	1669	0.949058				K02469	23710	20960	2789	0.353071
K02952	14560	14750	1642	0.910711				K02470	24110	21120	2934	0.337953
K02954	16980	16790	2267	0.935258				K02471	63.6	183	176	0.516448
K02956	14420	14790	1777	0.840296				K02472	231	327	181	0.610327
K02959	14560	14750	1641	0.910691				K02474	337	142	111	0.116337
K02961	13890	14550	1665	0.702173				K02475	224	144	124	0.538162
K02963	14410	14790	1777	0.836052				K02476	224	144	124	0.538162
K02965	14410	14790	1777	0.836052				K02477	3852	1724	997	0.065267
K02967	14680	14800	1668	0.94441				K02478	68	204	192	0.499048
K02968	14630	14670	1638	0.98112				K02481	546	299	150	0.137976
K02970	14240	14690	1602	0.785961				K02483	4249	2323	760	0.035093
K02982	14670	14790	1668	0.944402				K02484	340	132	115	0.107451
K02986	14690	14810	1666	0.944361				K02485	60.6	182	176	0.508518
K02988	14500	14650	1646	0.929627				K02487	59.6	182	176	0.507742
K02990	14680	14800	1668	0.94441				K02488	175	159	77.2	0.841044
K02992	14410	14790	1778	0.836077				K02492	6104	3458	841	0.013701
K02994	14420	14790	1777	0.840296				K02493	15000	13190	1072	0.129824
K02996	14010	14640	1694	0.719689				K02494	59.6	181	176	0.509577
K03040	14180	14730	1724	0.757843				K02495	21190	18540	4227	0.548204
K03043	14130	14520	1733	0.827591				K02496	59.6	181	176	0.509577
K03046	14640	14750	1669	0.949073				K02498	59.8	181	176	0.510224
K03048	3927	2405	917	0.135647				K02499	2711	4627	1348	0.192867
K03060	12940	12620	1549	0.841516				K02500	11260	9666	2071	0.463693
K03070	13590	14760	1892	0.553518				K02501	11070	9585	2092	0.498038
K03072	1009	829	303	0.568354				K02502	7871	4684	1749	0.105875
K03073	14030	14450	1676	0.808491				K02503	15210	13190	1233	0.140013
K03074	1530	1246	548	0.618031				K02504	59.6	181	176	0.509577
K03075	14330	14630	1614	0.857128				K02505	60.6	181	176	0.512424
K03076	15370	14880	1879	0.800889				K02507	62	183	176	0.512717
K03079	275	356	129	0.545239				K02508	59	181	176	0.508082
K03086	15500	15380	1717	0.945997				K02509	2317	2378	916	0.948537
K03087	200	131	65.8	0.325178				K02510	491	343	195	0.467748
K03088	89640	118400	12356	0.048336				K02511	59	181	176	0.508082
K03089	187	129	66.3	0.404337				K02517	606	482	226	0.59776
K03090	485	394	142	0.538279				K02518	15180	13280	1021	0.099857
K03091	40090	46910	4478	0.166249				K02519	15230	13300	1032	0.098287
K03092	2879	4196	1130	0.277531				K02520	14760	13160	1080	0.176908
K03093	686	868	326	0.592754				K02521	60.2	181	176	0.511573
K03095	3435	2205	1031	0.267007				K02523	747	567	211	0.418957
K03098	191	1281	407	0.027966				K02525	1250	1235	479	0.97579
K03100	31900	34850	6062	0.639546				K02526	959	612	205	0.130113
K03101	15220	15400	1804	0.922981				K02527	597	476	223	0.603366
K03106	14680	14800	1668	0.944423				K02528	15400	13400	1118	0.111304
K03110	14670	14790	1666	0.944357				K02529	68480	59730	4753	0.102902
K03111	25250	28830	2794	0.236006				K02530	662	496	238	0.50594
K03113	222	1385	366	0.013044				K02531	1359	1716	778	0.658601
K03116	943	1608	398	0.133496				K02532	202	240	181	0.838882
K03117	206	147	84	0.505407				K02533	361	371	198	0.960168
K03118	900	1619	404	0.112725				K02535	630	537	214	0.675734
K03147	7943	9060	2575	0.675959				K02536	798	625	206	0.426138
K03148	528	512	175	0.93023				K02538	133	133	106	0.998539
K03149	6719	7256	2253	0.817602				K02547	4588	1857	1280	0.065447
K03150	12090	15150	4390	0.505529				K02548	9547	8143	3549	0.702773
K03151	14240	13450	1373	0.580902				K02549	179	269	170	0.607702
K03152	14070	14400	1744	0.854672				K02551	616	393	216	0.332351
K03154	10450	12940	4128	0.563051				K02552	83.8	206	173	0.501095
K03168	14240	14640	1757	0.825665				K02553	63.8	181	176	0.523085
K03169	24640	32270	3789	0.078839				K02556	3174	5036	1377	0.213319
K03177	15950	14830	2146	0.615904				K02557	6254	6007	1583	0.879843
K03179	392	1411	368	0.024405				K02558	81.4	191	179	0.557108
K03182	759	1709	401	0.045288				K02560	59.6	181	176	0.509577
K03183	7095	8297	953	0.242933				K02562	4.6	22.6	17.1	0.322897
K03186	760	1710	401	0.045478				K02563	14870	13150	1008	0.1264
K03187	3126	5382	1927	0.275485				K02564	14910	12730	1061	0.073889
K03188	3126	5383	1927	0.275288				K02565	59	181	176	0.507306
K03189	3126	5383	1927	0.275288				K02566	513	199	114	0.025207
K03190	3126	5383	1927	0.275288				K02567	265	281	230	0.945523
K03191	3104	5363	1931	0.275648				K02568	263	281	230	0.938827
K03205	23870	26810	4312	0.514601				K02569	61.2	182	176	0.513289
K03210	14360	14350	1899	0.995928				K02570	275	287	228	0.957301
K03216	14480	13390	1745	0.549508				K02572	59	181	176	0.507306
K03217	18700	16990	2460	0.506586				K02573	265	281	230	0.945523
K03218	14610	14750	1687	0.935894				K02574	3200	1224	901	0.059557
K03269	250	1372	419	0.027962				K02575	1358	1335	488	0.963593
K03270	494	1458	430	0.055275				K02584	201	174	75.4	0.733444
K03271	466	434	100	0.760533				K02585	279	176	56	0.101425
K03272	207	227	95.7	0.839668				K02586	350	208	72	0.083761
K03273	199	148	66.9	0.462947				K02587	542	347	109	0.113671
K03274	12.8	92.2	40.7	0.087193				K02588	7999	7077	1696	0.601597
K03281	448	1499	380	0.024377				K02589	491	383	141	0.467096
K03282	10140	8500	740	0.057533				K02590	491	383	141	0.467096
K03284	12510	12700	1374	0.893412				K02591	576	367	118	0.116649
K03286	11.4	91.6	39.9	0.07945				K02592	274	175	56	0.114549
K03287	404	1315	387	0.046426				K02594	421	232	93.6	0.078086
K03292	17150	18610	3691	0.702733				K02598	2990	954	935	0.061025
K03293	14660	11440	4141	0.459164				K02600	15400	13400	1117	0.111238
K03294	16100	12570	3878	0.389299				K02601	17370	14400	1115	0.028678
K03295	3133	3378	1473	0.872022				K02609	59	181	176	0.508082
K03296	1995	3617	846	0.091491				K02610	59	181	176	0.508082
K03297	482	223	102	0.034147				K02611	59	181	176	0.508082
K03298	25.6	108	36.7	0.054046				K02612	59	181	176	0.508082
K03299	1571	365	465	0.031895				K02613	59	181	176	0.508082
K03300	290	182	96.9	0.297624				K02614	945	703	269	0.393825
K03303	2186	2280	957	0.924205				K02615	59	181	176	0.508082
K03305	3465	3818	1550	0.825549				K02616	59	181	176	0.507807
K03306	2930	3324	1492	0.798435				K02618	59	181	176	0.508082
K03307	6476	5204	1728	0.482717				K02619	542	370	201	0.415323
K03308	29700	35240	6484	0.417714				K02621	5195	4382	1319	0.554841
K03310	27870	28580	4360	0.874678				K02622	5398	4467	1233	0.4719
K03311	7213	6231	1253	0.455783				K02639	176	160	76.6	0.843612
K03312	5190	4261	1683	0.596053				K02647	16660	12470	3012	0.201628
K03313	504	227	156	0.114235				K02650	776	631	71.4	0.077929
K03315	6780	6648	1013	0.8995				K02652	1564	1074	269	0.10653
K03316	4087	2540	1512	0.336325				K02653	5361	6477	1364	0.436926
K03317	1306	273	524	0.084005				K02654	16280	15170	3737	0.773999
K03319	3591	2267	1172	0.291228				K02662	1227	797	213	0.078187
K03320	2202	863	416	0.012216				K02663	302	223	100	0.453262
K03321	1000	544	217	0.068751				K02664	302	211	103	0.406732
K03322	402	410	130	0.952382				K02666	175	159	77.7	0.842089
K03324	17720	19680	3417	0.582031				K02669	4872	3757	583	0.09228
K03325	1892	2804	1397	0.532265				K02679	59.6	181	176	0.509577
K03326	14.2	96.4	40.4	0.076127				K02680	59.6	181	176	0.509577
K03327	678	2731	773	0.029018				K02682	59.6	181	176	0.509577
K03328	453	1690	388	0.012848				K02686	59.8	181	176	0.510224
K03340	6675	8344	2488	0.52122				K02687	14130	12500	1024	0.149978
K03346	3868	2360	931	0.143757				K02688	71.2	182	176	0.546146
K03366	2575	479	1024	0.074893				K02691	204	99.8	79.4	0.226809
K03367	3467	2165	1046	0.248404				K02703	175	159	76.8	0.840191
K03382	1609	2473	1459	0.5702				K02742	59	181	176	0.507306
K03385	289	187	96.9	0.321475				K02744	2822	2740	761	0.916885
K03386	2741	2284	665	0.511651				K02745	1180	864	364	0.41107
K03387	272	1397	369	0.015871				K02746	1190	864	360	0.391487
K03388	3803	6745	2186	0.215168				K02747	1180	864	364	0.411152
K03389	3823	6658	2250	0.243137				K02750	2693	2427	1175	0.826638
K03390	3591	6614	2235	0.213239				K02755	205	87.2	155	0.468881
K03394	18550	18000	2821	0.850305				K02756	205	87.2	155	0.468881
K03399	1258	164	488	0.055315				K02757	17050	14090	2079	0.192283
K03402	14440	11430	1715	0.117362				K02759	8049	9129	685	0.153522
K03406	37450	35200	15283	0.886601				K02760	8955	9732	754	0.333172
K03407	3609	3593	1707	0.992752				K02761	19850	18550	4675	0.787999
K03408	4806	4034	2077	0.719766				K02765	6608	6388	1638	0.896488
K03409	963	366	538	0.299587				K02768	1108	924	444	0.689239
K03410	2231	2973	1425	0.616587				K02769	619	580	386	0.92091
K03411	2459	2932	1474	0.756558				K02770	12800	11610	1429	0.429256
K03412	3356	3394	1676	0.982471				K02773	2675	1710	705	0.208276
K03413	7184	5333	1908	0.360493				K02774	1643	1656	391	0.974291
K03415	380	199	140	0.234084				K02775	2148	2236	525	0.871033
K03424	15940	16310	1966	0.855432				K02777	4382	3308	1753	0.557126
K03426	9594	11540	1385	0.19771				K02778	407	172	309	0.469313
K03427	18160	16570	1955	0.439522				K02779	1637	1105	527	0.342719
K03429	3927	2657	979	0.230803				K02781	1489	774	823	0.410579
K03430	1666	2523	1449	0.570593				K02783	609	639	314	0.927324
K03431	13860	13390	1620	0.779039				K02784	68.4	183	175	0.533088
K03436	12630	13000	2144	0.867265				K02786	1752	2052	703	0.680959
K03437	14250	14560	1629	0.853817				K02787	204	86	155	0.468669
K03438	21090	21730	3838	0.871701				K02788	2172	2341	701	0.815494
K03439	14360	14630	1714	0.878729				K02790	59	181	176	0.508082
K03442	12980	13950	1759	0.596325				K02791	2445	4495	1436	0.191183
K03446	370	1325	412	0.049184				K02793	9192	5304	2273	0.125577
K03449	1932	288	283	0.000402				K02794	14980	11860	2241	0.201395
K03453	6267	7942	2287	0.484903				K02795	12250	11000	2225	0.589604
K03455	3227	3658	1465	0.776063				K02796	13100	9692	1953	0.119136
K03457	425	378	130	0.728337				K02798	1487	998	799	0.557666
K03458	15930	18420	3476	0.494208				K02800	1920	1163	708	0.316249
K03465	1506	930	295	0.086704				K02804	797	895	271	0.726133
K03466	14340	14800	1807	0.805526				K02805	3124	1210	905	0.067394
K03469	14100	14400	1728	0.866491				K02806	410	383	187	0.888791
K03470	14180	14620	1762	0.809067				K02808	220	117	149	0.512584
K03471	1439	493	475	0.081539				K02809	425	204	303	0.487656
K03473	209	1307	410	0.027913				K02810	12500	11310	900	0.222419
K03474	390	1353	415	0.048972				K02817	204	86	155	0.468669
K03475	1894	556	929	0.187799				K02818	205	87.2	155	0.46803
K03476	907	296	457	0.21836				K02819	619	471	321	0.658331
K03478	130	155	51.2	0.627777				K02821	953	812	428	0.750978
K03480	6092	6635	2043	0.797124				K02822	1608	1508	567	0.864425
K03481	1738	2153	877	0.648748				K02823	10910	9236	2248	0.477726
K03483	1344	2031	888	0.46152				K02824	10750	11260	414	0.252854
K03484	16980	19300	4116	0.588398				K02825	5099	3316	1555	0.284676
K03488	8329	10530	3657	0.563941				K02834	15400	13400	1117	0.111219
K03490	14.2	87.2	38.4	0.094025				K02835	15400	13400	1117	0.111223
K03491	4068	3186	1149	0.464737				K02836	14730	13020	1058	0.144764
K03492	1452	2027	934	0.555307				K02837	13620	12160	904	0.144866
K03495	14250	14710	1596	0.780501				K02838	15400	13400	1117	0.111223
K03496	38090	42370	5602	0.466815				K02839	72	190	175	0.517484
K03497	36610	42160	3506	0.152082				K02840	2233	2675	1259	0.734516
K03498	25860	29110	4116	0.45253				K02841	60.4	181	176	0.511259
K03499	27370	30240	4212	0.514819				K02843	285	402	175	0.522068
K03500	13760	13380	1589	0.817052				K02844	60.6	181	176	0.512998
K03501	14420	14810	1771	0.831208				K02847	59	181	176	0.507306
K03502	12690	14140	1718	0.42312				K02848	59	181	176	0.507306
K03503	207	1316	408	0.026257				K02849	59	181	176	0.507306
K03517	7740	9063	2547	0.617524				K02851	59.6	181	176	0.509577
K03518	12470	15690	2890	0.297617				K02852	81.4	191	178	0.556152
K03521	8750	8634	2842	0.968444				K02853	59	181	176	0.507306
K03522	8622	8647	2805	0.993107				K02858	79.8	214	172	0.456504
K03523	15590	16650	2837	0.718361				K02859	3460	3237	1571	0.890656
K03524	15720	17950	3088	0.490818				K02860	15510	13390	1216	0.119307
K03525	11250	12670	1457	0.358351				K02863	15400	13400	1117	0.111223
K03526	10690	12340	1461	0.291593				K02864	15120	13180	1106	0.117479
K03527	10880	12440	1510	0.331696				K02867	15400	13400	1117	0.111223
K03529	14360	13400	1380	0.506354				K02871	15360	13380	1115	0.113802
K03530	21510	27770	3635	0.123379				K02874	15400	13400	1116	0.110939
K03531	14210	14640	1558	0.789519				K02876	15230	13300	1033	0.098534
K03534	541	1644	482	0.051334				K02878	15400	13400	1117	0.111238
K03536	14440	14690	1675	0.885058				K02879	15350	13380	1106	0.11273
K03543	398	1461	450	0.045653				K02881	15280	13370	1169	0.140871
K03544	20130	21350	3992	0.767675				K02884	15400	13400	1117	0.111223
K03545	19240	18640	1538	0.706664				K02886	15400	13400	1117	0.111223
K03546	10440	10610	906	0.855781				K02887	15380	13310	1132	0.104871
K03547	10680	10520	943	0.869484				K02888	15380	13480	1119	0.127944
K03549	3182	4032	1885	0.664049				K02890	15400	13400	1117	0.111211
K03550	14680	14810	1662	0.939569				K02892	15400	13400	1117	0.111223
K03551	14680	14810	1661	0.939555				K02895	15280	13370	1168	0.140691
K03553	14430	14800	1774	0.840025				K02897	4422	1752	1065	0.036472
K03555	13840	14560	1666	0.676955				K02899	15240	13400	1039	0.114519
K03556	1834	2767	1413	0.527736				K02902	14780	12950	1015	0.109029
K03558	295	118	249	0.498386				K02904	15400	13400	1117	0.1112
K03559	856	1500	433	0.175367				K02906	15600	13490	1230	0.124702
K03561	962	2809	803	0.050536				K02907	14280	12830	917	0.152478
K03562	187	129	66.4	0.406055				K02909	15460	13670	1074	0.134167
K03563	2346	3109	1408	0.602731				K02911	15020	13080	942	0.073348
K03564	7973	13420	4244	0.235232				K02913	18170	15980	1327	0.137479
K03565	13760	14120	1762	0.84323				K02914	15070	13290	1144	0.158223
K03568	509	476	73.8	0.661141				K02916	15390	13400	1137	0.1182
K03569	25960	27230	2885	0.671466				K02919	11120	10560	826	0.517121
K03570	14040	14310	1837	0.886798				K02926	15400	13400	1117	0.111223
K03571	10200	9580	2789	0.829661				K02931	15230	13210	1055	0.091776
K03572	13820	14480	1711	0.709699				K02933	15400	13400	1117	0.111238
K03574	20150	17960	3005	0.486854				K02935	15400	13400	1117	0.111223
K03575	10450	11540	1674	0.533283				K02939	15400	13400	1117	0.111223
K03577	60.6	104	47.6	0.390538				K02945	11020	7714	1495	0.057899
K03581	13640	13270	1477	0.808472				K02946	13810	11410	1691	0.193682
K03584	14230	14380	1648	0.929714				K02948	15400	13400	1116	0.110939
K03585	499	2737	841	0.028748				K02950	15230	13300	1032	0.09832
K03587	1147	1616	447	0.324972				K02952	15240	13260	1128	0.117404
K03588	21540	22330	4101	0.852061				K02954	17500	14800	1207	0.05575
K03589	8495	5793	1441	0.097588				K02956	15280	13370	1169	0.140886
K03590	4356	3915	1297	0.742599				K02959	15240	13260	1128	0.117404
K03592	509	476	74	0.663527				K02961	14780	12970	990	0.104988
K03593	458	1513	371	0.021647				K02963	15280	13370	1169	0.140889
K03594	1303	1969	510	0.228039				K02965	15280	13370	1169	0.140889
K03595	14670	14800	1669	0.93981				K02967	15400	13400	1117	0.111223
K03596	14230	14640	1758	0.821422				K02968	15170	13120	1107	0.101139
K03601	14270	14670	1728	0.822759				K02970	14900	13060	1178	0.156821
K03602	14250	14650	1731	0.823025				K02982	15390	13390	1113	0.11002
K03604	423	291	113	0.277702				K02986	15520	13460	1091	0.095686
K03608	6426	6874	2077	0.834642				K02988	15070	13120	965	0.078022
K03609	9781	10920	1275	0.397645				K02990	15400	13400	1116	0.11098
K03610	3813	1973	708	0.03169				K02992	15280	13370	1169	0.14099
K03612	9833	12100	1486	0.165668				K02994	15280	13370	1169	0.140871
K03613	10340	12400	1395	0.177924				K02996	14960	13030	1118	0.122496
K03614	9826	12100	1290	0.11601				K03040	15170	13200	1117	0.115904
K03615	13520	17560	3077	0.225567				K03043	14920	13080	1024	0.110126
K03616	104	158	61.6	0.409239				K03046	15230	13300	1031	0.098224
K03617	9946	12250	1490	0.160727				K03048	4410	3829	1405	0.690023
K03621	14110	14490	1722	0.830842				K03060	13190	12090	780	0.196028
K03623	15.6	94	40.1	0.086097				K03070	14500	12520	1430	0.203583
K03624	25260	26260	3364	0.773859				K03071	60.2	181	176	0.510823
K03625	14560	14750	1642	0.910745				K03072	1490	978	340	0.170141
K03628	7761	8872	2600	0.680426				K03073	14560	12810	970	0.109006
K03629	14250	14590	1772	0.85264				K03074	2576	1909	307	0.061776
K03630	14140	14600	1759	0.80033				K03075	15050	13100	956	0.075726
K03631	14160	14550	1717	0.82605				K03076	15590	13520	1123	0.102521
K03635	1466	376	546	0.080907				K03077	514	164	152	0.049836
K03636	1468	376	545	0.080093				K03079	533	275	131	0.083364
K03637	6156	8876	1208	0.054414				K03081	313	198	190	0.561466
K03638	1281	250	519	0.082488				K03082	314	197	191	0.560122
K03639	8940	9846	1402	0.536115				K03086	16310	13990	1220	0.093733
K03640	245	217	72.3	0.712554				K03087	236	341	182	0.576765
K03641	187	129	66.3	0.405799				K03088	95020	93310	22261	0.940656
K03642	252	292	58.7	0.510443				K03089	235	339	182	0.581721
K03644	409	1444	373	0.024057				K03090	570	442	149	0.415283
K03647	4744	2681	1339	0.161861				K03091	43010	40710	7450	0.765419
K03648	11420	11250	3192	0.958827				K03092	3329	4992	1444	0.282649
K03650	14190	14670	1595	0.771077				K03093	717	514	144	0.197395
K03652	4456	4628	984	0.865589				K03095	3773	3436	1424	0.818921
K03654	10100	13970	2055	0.096379				K03098	309	276	198	0.871513
K03655	27150	27290	4761	0.977259				K03100	30680	24690	4121	0.184146
K03657	35590	37180	4100	0.708275				K03101	16160	13880	1350	0.129795
K03658	13.6	86.8	38.5	0.093609				K03106	15400	13400	1117	0.111223
K03660	12710	16170	2631	0.224935				K03110	15380	13380	1111	0.109478
K03664	14680	14800	1668	0.944423				K03111	28130	28180	3293	0.988258
K03665	13950	14630	1867	0.725143				K03112	59	181	176	0.507306
K03666	2433	3351	1549	0.56971				K03113	364	345	194	0.924215
K03667	2003	2111	924	0.90987				K03116	1129	835	293	0.345243
K03671	35470	42220	8235	0.436125				K03117	340	413	217	0.74444
K03684	625	232	143	0.025055				K03118	1162	928	290	0.442411
K03685	14680	14800	1668	0.94441				K03147	6729	3905	1372	0.073549
K03686	30370	31900	4934	0.764429				K03148	563	497	215	0.769
K03687	14640	14750	1668	0.949046				K03149	5384	2928	1213	0.077587
K03688	5854	2474	671	0.001001				K03150	11170	5900	2651	0.081997
K03694	294	91.8	258	0.454647				K03151	14850	13100	1090	0.147205
K03695	11240	12610	1487	0.383825				K03152	14520	12960	1203	0.230976
K03696	13990	14300	1700	0.859844				K03154	8574	4230	2283	0.093555
K03697	5563	5294	819	0.750908				K03168	14950	13090	1018	0.105182
K03698	11320	11980	1804	0.724026				K03169	26340	24120	5057	0.672308
K03699	9205	12770	1811	0.084566				K03177	15800	13570	1353	0.137884
K03700	10830	9674	2849	0.695561				K03179	513	495	197	0.931094
K03701	17990	18430	2667	0.873033				K03181	59.6	181	176	0.509577
K03702	14680	14800	1668	0.944423				K03182	978	849	214	0.560803
K03703	14630	14760	1669	0.939815				K03183	7929	8434	968	0.615996
K03704	15550	14110	1708	0.423561				K03184	59.4	181	176	0.508931
K03705	13950	13280	1485	0.663844				K03185	60.4	182	176	0.510663
K03706	7477	7193	2328	0.905918				K03186	985	851	213	0.54839
K03707	1762	2512	1461	0.621623				K03187	2764	855	1000	0.092724
K03708	2271	590	187	1.9e-05				K03188	2764	855	1000	0.09275
K03709	2001	368	257	0.00022				K03189	2764	855	1000	0.09275
K03710	12090	10550	1243	0.250549				K03190	2764	855	1000	0.09275
K03711	16190	20960	2382	0.08024				K03191	2711	832	983	0.09239
K03712	13630	12230	1952	0.493554				K03205	26060	26830	6264	0.905197
K03716	450	369	152	0.60789				K03210	14590	12760	1099	0.134419
K03718	348	1540	390	0.015602				K03212	61.6	183	176	0.512256
K03719	3413	3222	1519	0.903065				K03214	59	181	176	0.507306
K03721	11.8	93.2	40	0.076292				K03215	185	213	202	0.895208
K03722	6051	5271	840	0.380263				K03216	14760	13070	1283	0.224127
K03723	14040	14260	1803	0.905891				K03217	19200	16900	1331	0.122229
K03724	1293	2030	882	0.427814				K03218	15220	13240	1077	0.103304
K03733	2238	3707	1236	0.268721				K03219	60.8	181	176	0.51383
K03734	19830	22810	2867	0.328967				K03222	60.8	181	176	0.51383
K03737	12260	14730	1703	0.184969				K03224	60.8	181	176	0.51383
K03739	3467	2165	1046	0.248404				K03225	60.6	181	176	0.512998
K03740	3546	2180	1043	0.226815				K03226	60.8	181	176	0.51383
K03741	6216	8978	1114	0.038133				K03227	60.8	181	176	0.51383
K03742	5747	5660	1268	0.94697				K03228	60.8	181	176	0.51383
K03743	760	412	192	0.108095				K03229	60.8	181	176	0.51383
K03744	5831	5449	1593	0.816491				K03230	60.8	181	176	0.51383
K03750	7120	8784	1028	0.144094				K03269	417	318	215	0.657885
K03752	4847	5898	1941	0.603013				K03270	847	635	233	0.390806
K03753	4541	5874	1929	0.509101				K03271	855	558	207	0.189586
K03758	5903	919	2074	0.042942				K03272	316	533	349	0.550629
K03762	238	125	90.9	0.248317				K03273	315	377	189	0.750717
K03763	14160	13630	1510	0.734658				K03274	71	183	176	0.540883
K03767	696	178	429	0.261601				K03275	59	181	176	0.507306
K03768	14740	15290	1795	0.767089				K03281	621	537	213	0.700492
K03769	1091	953	249	0.593799				K03282	11220	11450	396	0.577764
K03770	476	1485	433	0.048105				K03284	12200	10710	1828	0.438575
K03771	261	1395	422	0.027686				K03286	70.6	183	176	0.539538
K03773	272	1415	430	0.028715				K03287	517	284	137	0.127144
K03774	575	211	211	0.122738				K03292	16010	12180	3360	0.287269
K03775	708	1503	444	0.111438				K03293	17390	18960	5264	0.773128
K03777	87.6	101	63.5	0.843				K03294	19780	20560	5187	0.884191
K03778	14430	12650	4388	0.695601				K03295	3905	3593	1584	0.8488
K03779	3600	5569	2035	0.361689				K03296	3146	2432	426	0.132184
K03780	3601	5577	2037	0.36053				K03297	1493	2101	779	0.457751
K03781	875	1496	464	0.217341				K03298	105	217	189	0.569548
K03782	216	209	55.1	0.904772				K03299	1474	1405	402	0.867877
K03783	7323	6383	1486	0.544612				K03300	1405	1962	723	0.463426
K03784	9023	9478	1101	0.690365				K03303	4085	4302	1879	0.910917
K03785	9399	9928	1701	0.76379				K03305	4348	4229	1386	0.933712
K03786	3813	5163	1330	0.339815				K03306	4902	6973	1117	0.1008
K03787	948	1664	486	0.17886				K03307	7066	7893	1542	0.60623
K03789	13160	13160	1372	>0.999999				K03308	28470	21250	5961	0.26039
K03790	498	401	154	0.542676				K03310	27860	29260	6743	0.840703
K03797	10920	14930	1999	0.079733				K03311	9316	11040	994	0.121189
K03798	30370	31680	4592	0.782696				K03312	5330	6883	1668	0.378991
K03799	3052	2511	1203	0.664937				K03313	754	603	271	0.593283
K03800	3025	853	218	9e-06				K03314	60.6	182	176	0.508883
K03801	385	1351	415	0.048408				K03315	7947	9360	910	0.158944
K03803	289	1390	423	0.031309				K03316	3828	3236	1231	0.643411
K03808	16.6	166	76.1	0.085873				K03317	1274	1272	475	0.996743
K03811	3457	2475	1133	0.411364				K03319	6216	6839	2995	0.8404
K03813	25.2	99.6	34.9	0.065855				K03320	2163	1981	521	0.735958
K03814	67.4	173	52	0.077188				K03321	1227	937	259	0.295861
K03816	12450	12980	1398	0.714525				K03322	513	349	102	0.147115
K03817	1262	1938	930	0.488157				K03324	16530	12270	3250	0.226306
K03820	653	1415	432	0.115841				K03325	2378	4442	1304	0.152168
K03823	10690	11480	1281	0.554573				K03326	82.4	189	174	0.555497
K03825	25	108	33	0.03599				K03327	993	697	332	0.398997
K03826	3485	1844	652	0.036001				K03328	909	732	369	0.644263
K03827	1514	3283	1254	0.196046				K03332	115	118	105	0.976433
K03830	315	323	95.4	0.935208				K03340	5689	3003	1371	0.085782
K03832	510	1738	460	0.028435				K03346	4342	3806	1414	0.714501
K03833	810	767	269	0.874581				K03366	2329	2389	920	0.949628
K03837	12	89	39.5	0.087242				K03367	3713	3366	1462	0.818335
K03839	258	1385	421	0.028018				K03382	2167	4202	1326	0.163466
K03841	12	85.8	38.4	0.090613				K03385	377	327	226	0.830259
K03856	7647	5847	1700	0.32062				K03386	2943	2572	605	0.557032
K03885	3893	3683	1271	0.872857				K03387	505	517	252	0.964454
K03892	21010	25640	2089	0.057537				K03388	3364	1234	970	0.059333
K03924	4759	4224	772	0.508115				K03389	3342	1110	935	0.044084
K03925	13390	13130	1296	0.845948				K03390	3126	993	981	0.061375
K03926	205	209	56.7	0.940032				K03394	16840	12640	2242	0.097938
K03927	1059	917	291	0.637293				K03399	1095	1046	445	0.915023
K03928	1247	184	480	0.057599				K03402	13200	11640	1707	0.387457
K03930	894	341	476	0.279633				K03406	40110	56670	13317	0.248883
K03969	531	473	168	0.735594				K03407	3923	5504	1369	0.281432
K03973	2536	459	1047	0.0826				K03408	4833	6147	1367	0.364476
K03975	4906	3986	1752	0.613668				K03409	699	447	240	0.324035
K03976	14000	14360	1734	0.840689				K03410	2860	4725	1352	0.205113
K03977	14680	14810	1661	0.939555				K03411	2823	4659	1314	0.199804
K03978	14390	14710	1820	0.86483				K03412	3296	5177	1353	0.202029
K03979	14300	14760	1746	0.798864				K03413	7046	7775	1421	0.621877
K03980	2782	3073	1493	0.850356				K03414	61.4	182	176	0.51409
K04013	238	124	90.7	0.245126				K03415	372	353	159	0.906622
K04014	464	164	172	0.119593				K03417	59.4	181	176	0.507903
K04015	973	259	341	0.069846				K03424	16620	14260	1003	0.046411
K04023	1746	2569	1466	0.589965				K03426	9318	8403	2074	0.670774
K04024	5893	8059	948	0.051688				K03427	18960	16570	1290	0.101165
K04028	4917	7958	1024	0.01788				K03429	4804	4011	1453	0.600132
K04029	6153	8135	967	0.074671				K03430	2084	4201	1328	0.149539
K04031	9538	13840	2815	0.165002				K03431	14400	12950	930	0.157663
K04041	9010	9966	1435	0.523977				K03435	59	181	176	0.507306
K04042	11370	9188	805	0.026609				K03436	12970	11310	1579	0.323749
K04043	16590	17650	1166	0.38973				K03437	14850	12840	1259	0.149142
K04045	486	479	112	0.954446				K03438	20480	16060	2405	0.103361
K04047	4338	2464	1052	0.11259				K03439	15050	13190	1126	0.137296
K04061	2426	2921	1466	0.744349				K03442	13290	12250	938	0.299665
K04066	14130	14560	1707	0.807474				K03446	478	434	204	0.83619
K04068	14000	14640	1870	0.740948				K03449	1374	1345	384	0.941581
K04069	27250	31060	5086	0.47525				K03451	213	104	83.5	0.22881
K04070	9152	9775	1166	0.607755				K03453	5301	2568	1218	0.055064
K04072	19530	20070	3697	0.887497				K03455	4129	3808	1532	0.839279
K04074	4477	3207	797	0.149597				K03457	516	433	196	0.682574
K04075	14380	14670	1633	0.863422				K03458	16280	13000	1837	0.111999
K04076	247	292	115	0.708039				K03465	2014	1219	286	0.023763
K04077	14910	14700	1938	0.916368				K03466	14910	13070	887	0.07177
K04078	14870	14650	1937	0.912382				K03469	15110	13530	692	0.051852
K04079	10800	12380	1502	0.323418				K03470	14720	12940	1032	0.122829
K04083	13940	13310	1359	0.655188				K03471	1098	792	340	0.395275
K04086	1904	196	279	0.000282				K03472	59	181	176	0.507306
K04087	3385	5461	1910	0.308719				K03473	339	287	203	0.8055
K04088	3125	5456	1962	0.268818				K03474	514	446	209	0.752954
K04094	6091	6067	990	0.981245				K03475	1384	1020	541	0.520222
K04095	2759	547	455	0.001255				K03476	499	291	231	0.392064
K04096	14040	14520	1684	0.782861				K03478	381	300	224	0.725036
K04477	10460	13220	4056	0.515411				K03480	4675	2002	1243	0.063657
K04485	13440	14230	1589	0.632445				K03481	2942	2504	1170	0.717813
K04486	12980	14040	1902	0.592627				K03483	1524	753	776	0.350056
K04487	28270	28370	2359	0.967229				K03484	17040	13770	1945	0.131146
K04488	13190	11580	1205	0.21835				K03485	59	181	176	0.508082
K04516	885	1321	546	0.447631				K03486	1834	2005	792	0.834522
K04517	11430	12320	1730	0.620834				K03488	8763	5568	1955	0.14083
K04518	1098	1583	585	0.431179				K03489	1183	1652	831	0.588173
K04562	1508	473	759	0.209928				K03490	86	192	174	0.560582
K04564	3225	4308	1323	0.436681				K03491	3938	2855	725	0.173494
K04565	451	620	171	0.351523				K03492	1681	813	762	0.287505
K04567	14340	14760	1776	0.818999				K03493	312	197	191	0.562857
K04651	1254	1024	265	0.411061				K03495	14920	13150	1186	0.174084
K04652	3600	1775	754	0.041789				K03496	40700	33870	5324	0.235465
K04653	859	631	137	0.135184				K03497	40770	38020	4506	0.558591
K04654	1053	718	197	0.12788				K03498	25450	20280	4540	0.287748
K04655	2999	3642	1281	0.62924				K03499	27800	21710	4811	0.241206
K04656	1053	718	197	0.12788				K03500	14370	12880	1008	0.177768
K04720	16170	16870	3122	0.828234				K03501	15290	13460	1175	0.157907
K04744	11	87.2	39	0.086246				K03502	13510	12040	1004	0.181299
K04749	439	363	133	0.582032				K03503	323	281	198	0.83672
K04750	1764	486	588	0.061343				K03517	6772	4026	1414	0.087992
K04751	1742	1268	389	0.257702				K03518	11760	9079	2779	0.362934
K04753	89	102	63.4	0.844952				K03519	112	58.4	56.2	0.364378
K04757	312	334	140	0.876813				K03521	9279	12450	2952	0.31414
K04758	29350	31650	3563	0.536677				K03522	9153	12440	2917	0.29247
K04759	22550	23300	2814	0.796542				K03523	14610	11240	2570	0.226137
K04761	70.6	178	52.5	0.074522				K03524	15230	11720	2559	0.207371
K04762	251	1373	418	0.027902				K03525	11730	9838	2097	0.39328
K04763	18540	21410	3799	0.471636				K03526	10910	9330	2011	0.454639
K04764	201	162	67.3	0.578224				K03527	11010	9538	2017	0.486396
K04767	936	325	484	0.24239				K03528	59.6	181	176	0.509577
K04769	6852	9687	1225	0.049373				K03529	14920	13050	1136	0.138501
K04773	1376	2040	531	0.246579				K03530	22710	19840	2723	0.322697
K05020	267	268	73.9	0.989534				K03531	15090	13110	1029	0.090443
K05297	3103	5360	1930	0.276005				K03534	926	426	223	0.055329
K05305	3108	5365	1931	0.276138				K03536	15170	13330	1168	0.153747
K05311	1581	1973	913	0.678965				K03543	584	628	368	0.909531
K05337	3299	3523	1597	0.891936				K03544	19620	15530	2321	0.116071
K05338	1219	210	466	0.062382				K03545	19470	19050	2008	0.839532
K05339	1219	210	466	0.062382				K03546	10190	9465	1506	0.64308
K05340	3767	2359	1514	0.379713				K03547	10230	9525	1580	0.66734
K05341	3322	5468	1989	0.312				K03548	59.6	181	176	0.509577
K05346	1386	232	532	0.06198				K03549	4179	3203	1895	0.620459
K05349	30420	33540	5613	0.59352				K03550	15400	13490	1122	0.127011
K05350	3061	1152	1320	0.186056				K03551	15410	13490	1123	0.125756
K05363	414	396	140	0.89842				K03553	15400	13410	1141	0.119401
K05364	7265	7396	2303	0.956041				K03554	59.6	181	176	0.509577
K05365	16.8	166	76.3	0.08653				K03555	14360	12710	1069	0.161456
K05366	27740	29740	3648	0.598436				K03556	2266	4339	1334	0.158722
K05367	283	111	248	0.506331				K03557	59.6	181	176	0.509577
K05368	16.4	165	76.1	0.086061				K03558	231	226	202	0.983191
K05396	245	341	51.5	0.101111				K03559	859	698	230	0.502906
K05499	18.4	99.2	36.9	0.059788				K03560	59.6	181	176	0.509577
K05515	10390	12220	1353	0.213163				K03561	1120	707	286	0.187141
K05516	668	240	145	0.018302				K03562	236	339	182	0.58619
K05520	394	1423	370	0.023988				K03563	3041	5003	1441	0.210498
K05521	1978	658	452	0.019327				K03564	8180	3803	2289	0.092235
K05540	2525	3119	1584	0.717401				K03565	14170	12720	892	0.142862
K05568	4777	3983	1627	0.638681				K03566	60.2	181	176	0.511519
K05592	5630	5023	1297	0.652275				K03567	61.2	182	176	0.513289
K05593	1355	515	392	0.064194				K03568	741	708	193	0.869571
K05595	515	372	235	0.561225				K03569	27690	25070	2080	0.243333
K05776	463	1308	477	0.114269				K03570	14310	12660	994	0.135563
K05777	363	297	118	0.595639				K03571	9764	6634	1543	0.07698
K05785	18.4	105	42.1	0.073769				K03572	14340	12660	1068	0.154243
K05786	12.4	88	38.4	0.084281				K03573	59.6	181	176	0.509577
K05788	191	129	64.5	0.363069				K03574	19400	18660	2847	0.801462
K05792	11.6	92.8	35.9	0.053514				K03575	9905	8567	2040	0.530348
K05794	67.4	133	37.7	0.118777				K03576	59.4	181	176	0.508779
K05795	5985	6699	2048	0.73631				K03577	97.6	206	174	0.549049
K05796	155	164	59.9	0.88426				K03578	60.8	183	177	0.510267
K05799	9220	10330	1301	0.418326				K03579	181	212	199	0.882501
K05801	47.8	144	46.8	0.074327				K03580	59.8	181	176	0.510559
K05804	60	278	111	0.084153				K03581	14200	12730	1082	0.211297
K05807	429	1417	424	0.047907				K03582	61	182	176	0.513539
K05808	11170	12490	1848	0.495377				K03583	60.2	182	176	0.510949
K05810	9909	10790	1388	0.543207				K03584	14990	13040	988	0.083964
K05813	2974	3575	1421	0.683401				K03585	839	640	434	0.658229
K05814	89.4	139	42.7	0.277076				K03586	59.6	181	176	0.509577
K05815	39.2	114	33.9	0.057548				K03587	1245	907	312	0.310198
K05822	1342	1956	957	0.539018				K03588	21030	16380	2514	0.101496
K05823	3206	2204	1026	0.35746				K03589	8127	6651	1229	0.264099
K05832	17260	18410	3359	0.7409				K03590	4720	4104	1413	0.674424
K05833	21360	21710	2694	0.899854				K03591	59.6	181	176	0.509577
K05837	13830	14210	1711	0.829805				K03592	740	708	193	0.87114
K05845	2002	311	267	0.000225				K03593	637	631	187	0.976814
K05846	5936	3815	1577	0.215475				K03594	1503	1023	239	0.079661
K05847	4281	3173	1514	0.485088				K03595	15400	13400	1118	0.111384
K05878	2447	1400	556	0.096625				K03596	14950	13080	1018	0.10343
K05879	2478	1428	554	0.094407				K03597	59.6	181	176	0.509577
K05895	3388	3027	1503	0.816284				K03598	60	181	176	0.510871
K05896	14420	13430	1351	0.484676				K03599	59.8	181	176	0.510224
K05910	1341	1954	956	0.539501				K03600	59.8	181	176	0.510224
K05919	3998	4172	1715	0.921699				K03601	14860	13050	1000	0.107923
K05921	16.4	165	76.1	0.086061				K03602	14830	13040	989	0.108029
K05934	9856	9960	1122	0.928427				K03603	59	181	176	0.507306
K05936	9864	9970	1121	0.92697				K03604	861	778	247	0.745021
K05939	17.4	166	76.1	0.087009				K03607	59.6	181	176	0.509577
K05946	9965	11630	1400	0.268577				K03608	5099	2557	1235	0.073611
K05964	1618	2103	921	0.612663				K03609	10060	9096	2073	0.654368
K05966	1537	2084	893	0.557061				K03610	3069	2449	469	0.222293
K05970	389	1425	389	0.028721				K03611	60.6	181	176	0.511908
K05985	6559	5781	909	0.416948				K03612	9978	8814	2082	0.591485
K05989	8709	10650	3137	0.553316				K03613	10730	9173	2148	0.489223
K05993	2168	394	237	7.1e-05				K03614	10380	8889	2039	0.485581
K05995	589	1595	484	0.071169				K03615	13040	9875	2850	0.298954
K06001	1159	1639	510	0.374028				K03616	244	401	195	0.444903
K06012	9240	10600	1207	0.292671				K03617	10240	9041	2172	0.596021
K06016	194	212	35.8	0.617643				K03620	236	141	76.1	0.245525
K06023	26730	26230	2989	0.871316				K03621	14970	13230	1105	0.153883
K06024	14120	13370	1485	0.627212				K03623	66.2	205	192	0.489792
K06041	687	1667	458	0.064647				K03624	25980	23420	1802	0.193271
K06042	9831	9932	1115	0.930073				K03625	15230	13260	1124	0.117847
K06075	53.4	137	42.7	0.085535				K03628	6754	3784	1347	0.058559
K06076	204	156	66.5	0.494643				K03629	14820	12990	998	0.104045
K06131	25190	26340	2996	0.711109				K03630	14730	12940	1086	0.137938
K06133	7024	7464	2240	0.849199				K03631	14610	12910	902	0.096086
K06142	1672	4475	1184	0.045381				K03632	59.6	181	176	0.509577
K06147	123500	121100	12624	0.853957				K03633	59.6	181	176	0.509577
K06148	24890	23650	3055	0.695477				K03634	63.6	182	176	0.521118
K06153	17320	19000	3517	0.64565				K03635	1342	1443	503	0.845839
K06158	14070	14660	1851	0.758029				K03636	1345	1442	502	0.851615
K06167	507	1295	459	0.124093				K03637	6483	6651	1642	0.921048
K06168	10680	12370	1447	0.276328				K03638	1108	1103	470	0.991766
K06173	18620	17000	2134	0.469578				K03639	8172	7683	1771	0.789474
K06177	843	1632	700	0.292187				K03640	344	381	186	0.847756
K06178	7943	7635	525	0.573576				K03641	236	339	182	0.585909
K06179	10780	11250	1237	0.713938				K03642	343	437	179	0.612282
K06180	43600	45500	8579	0.830281				K03643	60	181	176	0.510871
K06182	6504	7084	2158	0.794884				K03644	546	528	213	0.934097
K06183	13940	14850	2405	0.715044				K03645	59.6	181	176	0.509577
K06187	15320	14840	1877	0.80461				K03646	62.2	182	176	0.516849
K06191	1948	259	272	0.000256				K03647	3975	3157	1111	0.482458
K06193	718	188	419	0.241649				K03648	10940	7539	1624	0.069558
K06194	203	1304	410	0.027791				K03650	14860	13140	1171	0.179934
K06196	1738	1259	343	0.200452				K03651	60.6	182	176	0.511646
K06198	3434	2205	1031	0.267366				K03652	5598	7522	799	0.042726
K06199	11980	12190	4040	0.959817				K03654	10700	9212	1151	0.232049
K06200	8385	9653	1422	0.39872				K03655	26450	19390	3082	0.051184
K06201	5350	7614	2613	0.411483				K03656	59.6	181	176	0.509577
K06204	204	211	56	0.900809				K03657	36230	32210	3379	0.268325
K06206	5806	8711	975	0.017613				K03658	72	190	175	0.517484
K06207	14600	14640	2067	0.985034				K03660	13210	9617	2872	0.246224
K06208	486	295	320	0.567519				K03664	15400	13400	1117	0.111223
K06209	9060	10220	1165	0.348358				K03665	14660	12990	1037	0.145812
K06211	19.8	101	32.5	0.036162				K03666	3572	5516	1491	0.228501
K06212	350	169	129	0.198631				K03667	2791	2600	1219	0.879341
K06213	10600	11590	1339	0.480857				K03668	59.8	181	176	0.510406
K06215	1434	1031	422	0.367093				K03671	35240	26120	5365	0.127544
K06217	13980	14660	1929	0.733625				K03673	61	181	176	0.513207
K06221	175	282	58.2	0.104265				K03674	59.6	181	176	0.509577
K06223	9162	10330	1177	0.349964				K03675	59	181	176	0.508082
K06281	264	136	94.8	0.213973				K03683	59.6	181	176	0.509577
K06282	271	140	96.4	0.210689				K03684	727	680	283	0.871324
K06283	2868	3709	1409	0.567036				K03685	15400	13400	1117	0.111223
K06284	2903	3664	1641	0.655118				K03686	29590	24340	4073	0.233475
K06285	225	290	106	0.553316				K03687	15230	13300	1032	0.09839
K06286	3435	2205	1031	0.267007				K03688	4922	3870	480	0.059671
K06287	11200	12470	1857	0.513315				K03690	59.6	181	176	0.509577
K06295	2830	3834	1618	0.552158				K03693	312	197	191	0.562898
K06296	270	378	92.6	0.276174				K03694	299	248	257	0.845049
K06297	238	316	103	0.474466				K03695	11620	10050	2162	0.48843
K06298	6659	7227	2223	0.804758				K03696	14590	12710	1024	0.103644
K06306	237	372	117	0.278855				K03697	6854	8144	556	0.049054
K06310	5888	6382	2026	0.813532				K03698	11010	10000	1248	0.441847
K06313	238	305	105	0.542502				K03699	11010	9732	1103	0.280112
K06317	432	528	91.1	0.321908				K03700	9981	6860	1701	0.103902
K06320	736	428	206	0.17491				K03701	19870	17300	1546	0.134927
K06330	3218	5406	1953	0.294997				K03702	15400	13400	1117	0.111223
K06331	442	607	207	0.448484				K03703	15220	13310	1024	0.099113
K06333	4796	6893	2127	0.353147				K03704	15790	14690	709	0.159175
K06334	3704	4347	1504	0.68035				K03705	14550	12760	1216	0.179106
K06346	11720	11040	1305	0.61643				K03706	5883	3137	1448	0.094476
K06373	3587	4166	1468	0.703571				K03707	2075	4227	1299	0.136064
K06374	3583	4172	1463	0.697763				K03708	1810	1483	432	0.47051
K06378	8926	10200	1330	0.366166				K03709	1469	1360	424	0.803523
K06379	9389	10600	1261	0.365002				K03710	14630	13580	917	0.285224
K06381	9803	11110	1264	0.331268				K03711	16440	15010	3598	0.701423
K06382	8727	10050	1328	0.348147				K03712	13270	11590	2219	0.470637
K06383	2309	3135	1500	0.596797				K03713	313	198	190	0.562107
K06384	276	323	114	0.686248				K03716	436	354	112	0.484598
K06385	8875	10130	1330	0.372983				K03717	59.2	181	176	0.507257
K06387	3673	4133	1478	0.763521				K03718	670	454	215	0.345694
K06390	9357	10560	1252	0.364764				K03719	4055	5806	1172	0.173399
K06391	5283	8502	1139	0.022315				K03720	184	212	201	0.891361
K06392	9352	10560	1252	0.362756				K03721	63.6	204	192	0.486312
K06393	8912	10180	1327	0.367428				K03722	7435	8827	679	0.074503
K06394	4367	6487	2167	0.356572				K03723	14130	12620	1035	0.182565
K06395	3363	5668	1975	0.276835				K03724	1324	677	836	0.461219
K06396	8739	10140	1269	0.301731				K03732	185	213	202	0.892198
K06397	6211	9203	1225	0.040368				K03733	3266	2992	1145	0.816919
K06398	9389	10600	1261	0.36488				K03734	19890	18330	2475	0.546025
K06399	9040	10460	1213	0.275284				K03735	39.8	77.6	24	0.153606
K06400	9149	8344	1927	0.687088				K03736	39.6	77.6	24	0.151677
K06402	313	349	131	0.788967				K03737	12920	13410	3037	0.875803
K06403	6508	6980	2193	0.834975				K03738	293	290	73.2	0.968316
K06404	6504	6971	2195	0.836866				K03739	3713	3366	1462	0.818335
K06405	9355	10550	1251	0.367338				K03740	3825	3449	1468	0.804377
K06406	9400	10600	1258	0.367929				K03741	6274	6054	1511	0.887816
K06407	9401	10600	1258	0.368308				K03742	6877	7936	1270	0.428384
K06408	694	746	198	0.799925				K03743	1142	912	307	0.474777
K06409	16080	17640	3124	0.631014				K03744	6462	5379	1269	0.418244
K06410	2431	3123	1449	0.645769				K03745	62.8	182	176	0.519133
K06411	2428	3118	1427	0.641694				K03746	60	181	176	0.510871
K06412	9000	10260	1311	0.364681				K03748	64	181	176	0.523921
K06415	254	304	115	0.671714				K03749	60.2	181	176	0.510611
K06416	932	604	235	0.200028				K03750	7217	7033	1306	0.891449
K06423	238	305	105	0.542502				K03752	4490	2661	718	0.034225
K06436	283	330	118	0.702834				K03753	4236	2286	695	0.022952
K06438	8602	9855	1327	0.372712				K03758	7151	7993	3306	0.8054
K06442	13820	13070	1463	0.622006				K03762	281	292	230	0.962989
K06518	10350	11720	1641	0.427935				K03763	14970	13080	1445	0.227333
K06603	528	324	331	0.553826				K03764	59.6	181	176	0.509577
K06726	2042	667	594	0.049466				K03767	377	383	309	0.985476
K06859	252	235	91.4	0.858763				K03768	16160	13820	1323	0.114834
K06861	719	1522	444	0.107912				K03769	1277	816	206	0.055569
K06864	8035	9320	1256	0.336349				K03770	678	508	238	0.49511
K06871	14990	16650	1813	0.386713				K03771	441	328	221	0.62336
K06872	6734	10480	1292	0.019912				K03772	65.6	182	176	0.525934
K06878	3732	2317	976	0.185233				K03773	452	333	224	0.609869
K06881	15210	14960	1604	0.879984				K03774	634	546	328	0.795121
K06885	4174	2727	887	0.141582				K03775	749	566	212	0.414375
K06887	24.2	248	114	0.085896				K03776	64.2	184	177	0.518062
K06889	25320	29210	3764	0.331575				K03777	75	213	172	0.446241
K06890	7280	5605	1014	0.137165				K03778	14630	11500	3427	0.387746
K06891	478	138	229	0.175841				K03779	3064	1142	1057	0.106623
K06894	21	106	41.6	0.074082				K03780	3065	1142	1058	0.106718
K06895	170	229	77.5	0.472933				K03781	878	545	240	0.202966
K06896	1260	2707	844	0.124868				K03782	265	399	177	0.467696
K06897	2195	2872	1501	0.664014				K03783	6967	7413	1612	0.789035
K06898	6685	6999	2087	0.88413				K03784	9583	8630	1537	0.552402
K06901	15750	15940	2139	0.931388				K03785	9067	9051	1425	0.991318
K06902	3954	1391	706	0.006658				K03786	5579	6729	1434	0.4457
K06903	1604	2552	1424	0.524429				K03787	1099	953	213	0.511688
K06904	1232	253	481	0.076302				K03788	59	181	176	0.507306
K06905	1593	2543	1426	0.523901				K03789	12660	10830	1576	0.278999
K06906	12	94.6	36.3	0.052206				K03790	738	559	231	0.462365
K06907	1685	2722	1400	0.480017				K03796	64	181	176	0.522683
K06908	1605	2555	1424	0.523347				K03797	11160	9528	2140	0.467558
K06909	1243	256	465	0.0665				K03798	29540	23810	3924	0.182379
K06910	1562	440	424	0.02946				K03799	3977	3968	1466	0.995253
K06911	889	2028	442	0.032904				K03800	2887	2496	393	0.349022
K06917	33	112	34.3	0.049975				K03801	510	445	209	0.764932
K06919	4722	3599	1626	0.509403				K03803	457	391	227	0.779545
K06920	293	323	61	0.63593				K03804	59.6	181	176	0.509577
K06921	4739	4459	1368	0.842946				K03806	59.8	181	176	0.510224
K06923	9276	10560	1311	0.356238				K03808	119	362	352	0.509331
K06925	14680	14800	1669	0.944431				K03810	226	145	126	0.541743
K06926	11870	15250	4612	0.484516				K03811	2893	2156	873	0.422841
K06929	1079	478	406	0.17655				K03812	59	181	176	0.507306
K06934	3695	5761	1848	0.296133				K03813	104	194	172	0.614164
K06937	3104	5364	1931	0.275585				K03814	170	223	182	0.777723
K06940	8184	7398	2055	0.712051				K03816	13320	11930	1012	0.206706
K06941	11910	12960	1746	0.564152				K03817	1230	564	853	0.457758
K06942	15320	14830	1883	0.801273				K03820	638	526	198	0.589508
K06948	4115	2589	939	0.142772				K03823	11400	10330	1328	0.443531
K06949	14630	14690	1706	0.972801				K03824	59	181	176	0.507306
K06950	29190	29100	3082	0.97742				K03825	111	196	172	0.633976
K06952	3118	5452	1967	0.269394				K03826	2786	2080	665	0.319238
K06956	41.4	111	31.9	0.060242				K03827	1611	875	865	0.419444
K06958	13750	13290	1631	0.785101				K03828	178	231	185	0.779949
K06959	12350	12500	1410	0.917886				K03830	575	247	163	0.078577
K06960	12270	11050	1224	0.348123				K03831	60	181	176	0.509812
K06962	1213	232	555	0.115081				K03832	839	930	539	0.869346
K06966	5198	7328	2278	0.377035				K03833	1105	913	331	0.578142
K06967	13530	13190	1439	0.819177				K03834	59.8	181	176	0.509347
K06969	19110	22570	2857	0.260374				K03835	61.6	182	176	0.514923
K06971	795	576	231	0.368813				K03837	62.6	181	176	0.519423
K06972	8960	9630	1320	0.625488				K03839	432	341	232	0.705216
K06973	8157	8937	2506	0.763592				K03840	59	181	176	0.507306
K06975	3384	3899	1329	0.708493				K03841	63.2	182	176	0.51745
K06978	826	752	157	0.650377				K03856	8611	8637	1558	0.987097
K06987	3749	5890	1895	0.291355				K03885	4521	4025	1394	0.73122
K06994	1503	1951	922	0.640236				K03892	22480	22060	4217	0.923111
K06997	12430	12690	1542	0.87028				K03919	59.2	181	176	0.508909
K06998	2166	2742	1437	0.699114				K03923	59.8	181	176	0.509761
K07001	2724	4596	1110	0.130199				K03924	4594	3153	605	0.044487
K07002	1280	250	525	0.08554				K03925	14280	12530	844	0.071968
K07003	10250	10650	1166	0.740466				K03926	265	399	176	0.467123
K07005	6789	6249	1477	0.724129				K03927	1830	779	374	0.022772
K07006	1513	1975	930	0.63287				K03928	1306	1166	465	0.771096
K07007	19040	22050	2804	0.314337				K03930	886	464	272	0.159608
K07008	13.2	85.6	38.1	0.0942				K03933	59.2	181	176	0.507951
K07009	8404	9154	2758	0.792572				K03969	667	525	243	0.57435
K07010	9240	6720	842	0.017245				K03970	59	181	176	0.507306
K07011	7008	10950	3241	0.258556				K03972	105	109	103	0.970078
K07012	9094	9913	2570	0.758102				K03973	2284	2406	840	0.888074
K07015	13780	13220	1557	0.728484				K03974	59	181	176	0.507306
K07016	3244	5466	1953	0.288083				K03975	5753	5106	1859	0.736832
K07017	4844	8007	1078	0.018859				K03976	14480	12480	1065	0.097335
K07019	11.2	85	38.3	0.090291				K03977	15410	13490	1123	0.125811
K07021	3434	2204	1031	0.267007				K03978	15240	13310	1167	0.136762
K07023	10310	9586	2728	0.797451				K03979	15130	13320	1188	0.16612
K07024	72540	72380	10159	0.98782				K03980	3236	5120	1466	0.234709
K07025	18810	21250	2241	0.307881				K03981	60.8	182	176	0.511417
K07027	10830	11500	3036	0.830855				K04013	276	301	226	0.913093
K07029	24310	25170	5038	0.868707				K04014	490	393	293	0.750754
K07030	13400	12880	1462	0.731306				K04015	956	653	434	0.50565
K07033	5754	4640	1795	0.552107				K04016	59	181	176	0.507306
K07034	29.8	98	40.8	0.133362				K04019	28.8	57.2	25.7	0.301921
K07035	11020	11620	1590	0.715678				K04023	2273	4277	1338	0.172622
K07037	818	1731	485	0.09628				K04024	5829	6209	1261	0.770799
K07038	141	117	105	0.827086				K04026	84.2	107	32.7	0.498011
K07040	13460	13070	1629	0.816839				K04028	5004	5194	1576	0.906986
K07042	14310	13460	1351	0.546846				K04029	6108	6266	1199	0.898391
K07043	10380	12260	1395	0.214807				K04030	48.2	62.2	25.4	0.597057
K07045	4252	4537	1640	0.866389				K04031	9245	7660	1889	0.425702
K07047	4342	3768	1349	0.681636				K04032	28.8	56	25.8	0.32169
K07048	23	94	40.8	0.119945				K04041	8460	7529	1833	0.625302
K07050	8597	9811	1323	0.385768				K04042	13340	14220	1541	0.583525
K07052	19730	20160	2392	0.861795				K04043	18060	17870	1769	0.917101
K07053	8791	7376	1538	0.38441				K04044	59.4	181	176	0.508779
K07054	692	183	423	0.263372				K04045	525	430	174	0.598978
K07056	14830	16010	1992	0.569932				K04046	59.2	181	176	0.508133
K07058	12530	13290	1795	0.68322				K04047	4341	4114	1257	0.861196
K07062	236	234	52.9	0.973706				K04058	60.6	181	176	0.512998
K07067	444	354	133	0.520456				K04061	2792	4681	1322	0.190862
K07071	196	132	66.2	0.362217				K04062	59.2	181	176	0.508909
K07074	240	323	86.9	0.370839				K04065	59.6	181	176	0.509395
K07075	437	235	117	0.121225				K04066	14690	12860	934	0.085721
K07076	277	334	117	0.64014				K04067	59	181	176	0.507306
K07078	2184	577	267	0.000315				K04068	14990	12980	1068	0.096559
K07079	7285	6113	1770	0.526589				K04069	27560	21730	5534	0.322911
K07080	8316	9435	1155	0.361003				K04070	9165	8223	1846	0.623676
K07082	10640	11880	1757	0.500311				K04072	21000	17340	1676	0.060478
K07083	183	1199	373	0.026028				K04074	5808	4826	1375	0.495321
K07085	1952	2803	978	0.40935				K04075	14990	13090	1070	0.113703
K07088	27990	32260	5584	0.466398				K04076	355	213	84.7	0.132252
K07089	11870	12080	1552	0.895735				K04077	15060	13140	1108	0.12143
K07090	16640	18500	948	0.085318				K04078	14900	13040	1023	0.106501
K07095	25420	28500	4128	0.476987				K04079	11030	9546	2081	0.49611
K07098	19460	24590	5264	0.358287				K04080	59.2	181	176	0.507951
K07099	5820	8886	1011	0.016237				K04082	59.4	181	176	0.508779
K07105	9873	10380	1622	0.762558				K04083	14500	12850	1130	0.18238
K07106	2591	2380	928	0.825873				K04085	60.2	182	176	0.510644
K07107	8491	10340	2591	0.495781				K04086	1285	1133	400	0.713788
K07112	4184	6568	2184	0.306735				K04087	2972	1080	954	0.08251
K07114	1433	3180	843	0.072025				K04088	2851	1050	1009	0.112164
K07118	2156	300	289	0.000205				K04091	59.4	181	177	0.509103
K07120	48.8	160	34.3	0.012031				K04094	8169	9010	489	0.124015
K07124	9985	7006	865	0.00879				K04095	1835	1721	318	0.729014
K07126	5394	7186	661	0.026571				K04096	14440	12650	877	0.075685
K07130	7869	5247	1494	0.117355				K04097	59.2	181	176	0.508909
K07132	379	452	163	0.666612				K04103	59.2	181	176	0.507951
K07133	31680	31550	6236	0.983879				K04477	9569	4584	2411	0.072456
K07137	20310	22880	2669	0.363776				K04485	14000	12410	946	0.131236
K07138	9433	10330	1003	0.397176				K04486	13540	13710	3023	0.956538
K07139	8297	9683	2480	0.591498				K04487	29240	28510	2122	0.739759
K07141	2239	2833	1429	0.68856				K04488	13960	12760	1402	0.41704
K07145	1265	169	522	0.068898				K04516	565	225	199	0.125075
K07146	693	187	424	0.267106				K04517	11100	9492	2150	0.475831
K07147	192	129	65.6	0.363581				K04518	787	388	243	0.138666
K07148	213	1324	413	0.027546				K04562	1068	680	410	0.370929
K07149	6117	6700	1950	0.772606				K04564	3818	5706	1660	0.288275
K07150	7835	10860	1095	0.024562				K04565	663	567	198	0.640781
K07154	4067	7005	2383	0.252536				K04567	15200	13310	1165	0.143292
K07160	3662	5697	2000	0.338711				K04568	184	213	201	0.891375
K07164	682	1408	422	0.123765				K04651	1836	1393	248	0.112372
K07166	11270	11020	1124	0.829622				K04652	2982	2049	330	0.022301
K07170	2614	3699	1277	0.420159				K04653	950	904	274	0.87119
K07171	21790	23040	2431	0.621005				K04654	1120	1009	304	0.724399
K07172	468	99	211	0.118651				K04655	3597	5378	1521	0.275332
K07173	12610	12490	1656	0.944008				K04656	1120	1009	304	0.724399
K07175	380	362	129	0.891088				K04691	59.6	181	176	0.509577
K07177	3442	2206	1030	0.264362				K04720	14070	10480	2476	0.185155
K07180	254	304	115	0.67329				K04744	63.8	182	177	0.522709
K07181	1767	2594	1442	0.582008				K04749	516	416	149	0.520036
K07183	9379	10510	1111	0.338464				K04750	1501	1264	498	0.647166
K07185	3551	5682	1917	0.298693				K04751	1836	1507	317	0.33019
K07192	921	373	443	0.250838				K04752	59.2	181	176	0.508133
K07213	842	570	318	0.41852				K04753	77.6	215	171	0.447345
K07214	131	206	65.4	0.283708				K04754	66.6	181	176	0.531955
K07216	9249	9820	1147	0.632128				K04755	60.2	182	176	0.509681
K07217	272	204	82.1	0.43134				K04757	323	218	60.8	0.120431
K07219	3449	5479	1948	0.327808				K04758	30490	27040	5593	0.554483
K07220	1171	746	175	0.041488				K04759	22400	19520	3858	0.476725
K07223	1280	334	530	0.112284				K04760	60.4	181	176	0.512653
K07230	15.4	85.6	39.3	0.111639				K04761	177	226	183	0.793874
K07238	13040	14960	2021	0.369865				K04762	418	319	216	0.659038
K07240	16830	20530	2713	0.209721				K04763	19150	15430	1668	0.056266
K07243	18.6	84.8	38.1	0.120351				K04764	259	344	183	0.653408
K07246	122	134	49	0.812829				K04767	526	337	241	0.454895
K07248	3345	5559	1987	0.297437				K04769	8236	7684	1885	0.777074
K07250	103	134	51.3	0.572428				K04770	59.6	181	176	0.509577
K07258	41780	49620	8911	0.404614				K04772	59.6	181	176	0.509577
K07259	537	1677	426	0.028139				K04773	1489	938	262	0.068885
K07260	5168	5258	1680	0.958587				K04774	59.6	181	176	0.509577
K07263	561	1448	495	0.111327				K05020	402	293	85.1	0.234001
K07264	16.4	165	76.1	0.086061				K05297	2709	830	981	0.091909
K07271	4857	2515	869	0.027317				K05305	2721	839	987	0.093065
K07273	2169	1622	872	0.548038				K05311	2522	2276	1233	0.846892
K07277	716	1512	447	0.112434				K05337	4036	5434	1407	0.349363
K07282	13170	16670	3280	0.31711				K05338	1170	1125	470	0.926057
K07284	14120	12530	1942	0.436698				K05339	1170	1125	470	0.926057
K07301	9867	10840	1265	0.46384				K05340	3513	2752	1279	0.568283
K07304	3174	2480	1205	0.580515				K05341	2916	949	1005	0.086061
K07305	3022	2401	1191	0.616316				K05343	411	251	112	0.190204
K07306	919	326	345	0.124063				K05346	1369	1245	487	0.805296
K07307	1331	717	385	0.149144				K05349	28010	21990	5918	0.338804
K07308	966	255	340	0.069562				K05350	2520	1185	644	0.071809
K07313	2842	2779	923	0.947272				K05362	312	197	191	0.562898
K07315	497	139	215	0.135717				K05363	476	351	210	0.568592
K07316	340	341	106	0.995607				K05364	6137	3398	1274	0.063715
K07319	3726	3482	1437	0.869403				K05365	119	362	352	0.509655
K07321	11780	17080	5713	0.380709				K05366	29510	25620	2339	0.134838
K07322	450	2511	752	0.025399				K05367	208	223	202	0.945009
K07334	681	300	105	0.006656				K05368	118	362	352	0.508594
K07335	16050	17770	955	0.109348				K05396	579	494	207	0.694477
K07339	381	176	74.7	0.025329				K05499	91.2	193	174	0.575777
K07341	1928	2204	927	0.773415				K05501	59.4	181	176	0.508779
K07343	617	223	267	0.178562				K05515	11040	9419	1960	0.432138
K07345	48.2	496	228	0.085735				K05516	775	538	178	0.219754
K07346	24.4	248	114	0.086148				K05517	63.4	181	176	0.522407
K07347	48.8	496	228	0.085971				K05520	527	517	210	0.963837
K07349	16	165	76	0.085074				K05521	2256	1838	439	0.369275
K07357	16	165	76	0.085074				K05522	64.2	184	177	0.517874
K07386	5894	5536	2146	0.871671				K05527	59.8	181	176	0.510224
K07387	213	1324	417	0.028506				K05539	173	215	187	0.828684
K07391	10360	12080	1432	0.26399				K05540	4536	7044	992	0.035324
K07393	1688	496	968	0.252942				K05541	59.6	181	176	0.509577
K07397	283	161	102	0.265334				K05566	182	247	57.8	0.297666
K07402	17870	23810	3864	0.162801				K05567	195	248	60.4	0.402598
K07404	9649	8848	2775	0.780182				K05568	4307	5988	1390	0.261171
K07405	242	1290	385	0.026004				K05569	114	175	50.1	0.253422
K07406	960	499	219	0.068188				K05570	99.2	153	50	0.314771
[truncated: 1,306 more rows]

## Sheet: KEGG-Level2
D 14
CategoryL2	Ctr_14d_1	Ctr_14d_2	Ctr_14d_3	Ctr_14d_4	Ctr_14d_5	FGC_14d_1	FGC_14d_2	FGC_14d_3	FGC_14d_4	FGC_14d_5	Mean-Ctrl	Mean-FGC	P-value	SEM
Amino Acid Metabolism	2618091	2460971	2203104	2791909	2419984	3916901	2769837	3500490	3504694	3176286	2498812	3373642	0.003618	215308
Carbohydrate Metabolism	3547423	2610715	2354187	2453603	2771831	4402886	3284589	3066547	4007720	3948478	2747552	3742044	0.015638	325248
Energy Metabolism	1997390	2211080	1330895	1834327	1542315	2634903	1899816	1409053	2376564	1498459	1783201	1963759	0.546326	286645
Lipid Metabolism	909115	1005905	649587	869552	764622	1094560	816418	677825	994286	721710	839756	860960	0.838321	100591
Metabolism of Cofactors and Vitamins	1116662	1049559	977983	1344501	1171235	1791502	1262974	1550347	1603194	1405512	1131988	1522706	0.007181	109119
Metabolism of Other Amino Acids	476881	525329	332100	453787	395137	576038	433451	337368	527468	357373	436647	446340	0.869992	57354
Metabolism of Terpenoids and Polyketides	535871	588368	362342	499718	439007	661180	503230	391683	606803	411887	485061	514957	0.661354	65736
D 28
CategoryL2	Ctr_28d_1	Ctr_28d_2	Ctr_28d_3	Ctr_28d_4	Ctr_28d_5	FGC_28d_1	FGC_28d_2	FGC_28d_3	FGC_28d_4	FGC_28d_5	Mean-Ctrl	Mean-FGC	P-value	SEM
Amino Acid Metabolism	3100233	1844818	2139202	2295952	2745604	3887499	2524694	2701120	2640731	2705748	2425162	2891958	0.201829	335698
Carbohydrate Metabolism	2441688	2866321	2875720	2804158	2773023	3644911	3230775	2679587	2760340	2960102	2752182	3055143	0.154751	307795
Energy Metabolism	2063491	2419056	1394638	1507991	1628013	1309761	1531025	1585258	1553030	1533718	1802638	1502558	0.167151	197500
Lipid Metabolism	649422	1094835	692745	728202	823693	923273	762685	788861	777755	779031	797779	806321	0.92236	84925
Metabolism of Cofactors and Vitamins	920364	1129673	1175010	1158175	1161408	1398764	1703513	1014459	1053588	1237527	1108926	1281570	0.235661	134642
Metabolism of Other Amino Acids	479722	550821	365755	377842	422121	350249	392616	399282	392536	390068	439252	384950	0.163887	35429
Metabolism of Terpenoids and Polyketides	555442	627965	408710	436102	476611	396329	443600	454431	447950	440881	500966	436638	0.160249	41560

## Sheet: KEGG-Level3-day 14
Level2	Level 3	Ctr_14d_1	Ctr_14d_2	Ctr_14d_3	Ctr_14d_4	Ctr_14d_5	FGC_14d_1	FGC_14d_2	FGC_14d_3	FGC_14d_4	FGC_14d_5
Amino Acid Metabolism	Alanine, aspartate and glutamate metabolism	342570	375819	239461	323065	274932	425391	312561	261601	386746	276548
Amino Acid Metabolism	Glycine, serine and threonine metabolism	265341	294186	182450	222214	191341	330975	233636	214401	296287	228447
Amino Acid Metabolism	Cysteine and methionine metabolism	308813	335389	224833	276099	253911	355021	268212	259993	323772	276033
Amino Acid Metabolism	Valine, leucine and isoleucine degradation	55175	56646	42102	45564	42755	50470	38619	53843	46269	56202
Amino Acid Metabolism	Valine, leucine and isoleucine biosynthesis	269080	306521	178131	210777	179387	340645	221657	198712	297006	211538
Amino Acid Metabolism	Lysine biosynthesis	308698	344444	198674	297958	249907	410543	303078	222236	373921	237909
Amino Acid Metabolism	Lysine degradation	36361	37705	26367	28112	26062	37186	25956	35004	32686	37353
Amino Acid Metabolism	Arginine and proline metabolism	418190	468146	287924	353717	321773	539724	365048	342309	477184	366973
Amino Acid Metabolism	Histidine metabolism	190485	203534	131799	161951	137852	241426	161065	149969	211221	158377
Amino Acid Metabolism	Tyrosine metabolism	106964	118335	79679	108526	107444	123996	94466	81840	112833	87306
Amino Acid Metabolism	Phenylalanine metabolism	47239	52009	36371	37629	31145	51777	32747	39894	44168	42622
Amino Acid Metabolism	Tryptophan metabolism	45222	49468	31668	36911	33021	55211	40159	33442	49737	34956
Amino Acid Metabolism	Phenylalanine, tyrosine and tryptophan biosynthesis	272915	304029	173991	214362	163768	349768	218213	192557	301023	205945
Biosynthesis Of Other Secondary Metabolites	Penicillin and cephalosporin biosynthesis	8311	9772	2800	6793	5500	15313	12225	3101	14571	2940
Biosynthesis Of Other Secondary Metabolites	Novobiocin biosynthesis	42005	45867	29151	29784	26388	48168	30478	37235	41400	39705
Biosynthesis Of Other Secondary Metabolites	Streptomycin biosynthesis	104440	117291	59174	93508	81596	154374	113557	71277	141354	75064
Biosynthesis Of Other Secondary Metabolites	Phenylpropanoid biosynthesis	54619	60774	27461	42134	28283	61212	39272	32926	53483	34205
Biosynthesis Of Other Secondary Metabolites	Flavonoid biosynthesis	531	450	255	267	332	248	297	581	208	482
Biosynthesis Of Other Secondary Metabolites	Flavone and flavonol biosynthesis	2858	4227	585	264	732	194	139	371	177	396
Biosynthesis Of Other Secondary Metabolites	Stilbenoid, diarylheptanoid and gingerol biosynthesis	316	221	120	410	201	73	114	122	79	124
Biosynthesis Of Other Secondary Metabolites	Isoquinoline alkaloid biosynthesis	13828	14805	9242	9794	9888	15963	10031	15413	13808	16831
Biosynthesis Of Other Secondary Metabolites	Tropane, piperidine and pyridine alkaloid biosynthesis	31309	33789	24385	20813	20854	33398	21017	33282	28505	35454
Carbohydrate Metabolism	Glycolysis / Gluconeogenesis	382244	251849	271143	379021	418876	453735	373123	337847	425886	265949
Carbohydrate Metabolism	Citrate cycle (TCA cycle)	139035	147400	99283	126174	101298	186749	139879	98406	170483	98784
Carbohydrate Metabolism	Pentose phosphate pathway	307681	340132	210423	282014	249317	359943	277471	212195	330039	226011
Carbohydrate Metabolism	Pentose and glucuronate interconversions	170588	194374	115551	123093	124226	218605	150397	130691	194423	138465
Carbohydrate Metabolism	Fructose and mannose metabolism	336767	373121	208905	271616	256622	451629	340075	216925	412498	234359
Carbohydrate Metabolism	Galactose metabolism	278177	320107	156576	229743	204788	361688	270038	169424	332469	182150
Carbohydrate Metabolism	Ascorbate and aldarate metabolism	28857	34094	13172	14633	12727	31780	20643	10555	27675	10880
Carbohydrate Metabolism	Starch and sucrose metabolism	377160	427600	222305	318524	268014	474701	349784	238420	432432	255375
Carbohydrate Metabolism	Amino sugar and nucleotide sugar metabolism	484580	534482	314665	410907	368210	598802	465462	325001	553703	343255
Carbohydrate Metabolism	Inositol phosphate metabolism	24185	26878	19025	26081	26228	33747	24836	15901	30466	16343
Carbohydrate Metabolism	Pyruvate metabolism	363094	404878	256873	333782	304771	443426	325651	267016	400368	286132
Carbohydrate Metabolism	Glyoxylate and dicarboxylate metabolism	167974	184851	106622	133387	114333	211665	143886	123325	187058	131777
Carbohydrate Metabolism	Propanoate metabolism	147677	132187	141528	129984	153710	201634	173981	192873	180813	158451
Carbohydrate Metabolism	Butanoate metabolism	157582	181637	158505	173731	174623	216622	200113	217193	193342	193920
Carbohydrate Metabolism	C5-Branched dibasic acid metabolism	112987	131619	71155	85390	75117	158160	98085	80071	136065	85787
Energy Metabolism	Oxidative phosphorylation	385259	423557	254812	347232	290771	539705	380786	277213	484916	291822
Energy Metabolism	Photosynthesis	172620	195066	100437	162697	131462	230422	166207	105317	209238	114257
Energy Metabolism	Methane metabolism	460707	516745	313019	414808	352251	632373	448116	319816	565933	343362
Energy Metabolism	Carbon fixation in photosynthetic organisms	202709	217041	138709	186671	156617	240965	184768	143724	221244	151790
Energy Metabolism	Carbon fixation pathways in prokaryotes	302440	331549	213600	271050	233363	384622	280366	235713	347750	247490
Energy Metabolism	Nitrogen metabolism	215608	238694	155704	203360	177023	275371	198404	163707	246429	173140
Energy Metabolism	Sulfur metabolism	84982	93175	53988	85356	68874	100765	74801	58020	91594	62215
Glycan Biosynthesis and Metabolism	N-Glycan biosynthesis	4954	5714	2151	3514	3317	12751	7776	2374	11118	2270
Glycan Biosynthesis and Metabolism	Other glycan degradation	65962	72788	37547	61972	45350	117958	81133	40862	107722	41038
Glycan Biosynthesis and Metabolism	Glycosaminoglycan degradation	6977	7072	3876	2154	1306	13254	9064	3560	12526	2273
Glycan Biosynthesis and Metabolism	Lipopolysaccharide biosynthesis	9354	3403	6704	11319	7375	29407	19584	9214	26894	5287
Glycan Biosynthesis and Metabolism	Peptidoglycan biosynthesis	295931	329784	200522	269672	242182	364197	274781	217295	332865	230471
Glycan Biosynthesis and Metabolism	Glycosphingolipid biosynthesis - ganglio series	3463	2504	2656	1517	433	10747	7304	2638	10204	1486
Lipid Metabolism	Fatty acid biosynthesis	163899	186062	119295	153701	139216	190836	137241	128513	171205	138092
Lipid Metabolism	Synthesis and degradation of ketone bodies	15316	15815	13417	17103	16554	8096	11034	15392	9354	16719
Lipid Metabolism	Primary bile acid biosynthesis	10472	11543	5303	13662	9256	16401	13339	4153	15731	4329
Lipid Metabolism	Secondary bile acid biosynthesis	10471	11542	5301	13662	9256	16400	13339	4152	15731	4328
Lipid Metabolism	Steroid hormone biosynthesis	268	126	141	393	228	125	139	114	140	66
Lipid Metabolism	Glycerolipid metabolism	143883	162834	103112	138259	133374	169287	129152	95331	155063	101456
Lipid Metabolism	Glycerophospholipid metabolism	197275	216407	132520	194017	155321	242875	186096	137870	222629	148002
Lipid Metabolism	Ether lipid metabolism	400	415	198	408	826	338	369	592	341	466
Lipid Metabolism	Arachidonic acid metabolism	4625	4583	3690	1426	2955	1809	1142	6885	1345	7317
Lipid Metabolism	Linoleic acid metabolism	20983	23165	16120	17535	20454	28472	18443	18762	24617	20386
Lipid Metabolism	alpha-Linolenic acid metabolism	794	335	72	412	240	708	310	94	446	83
Lipid Metabolism	Sphingolipid metabolism	56524	62212	35505	55591	44714	86228	63813	39990	79870	40950
Lipid Metabolism	Biosynthesis of unsaturated fatty acids	36094	39857	23901	31239	27666	47688	34282	29004	42349	31201
Metabolism Of Cofactors and Vitamins	Ubiquinone and other terpenoid-quinone biosynthesis	21343	18265	20756	38863	33971	34384	34226	15797	35427	13634
Metabolism Of Cofactors and Vitamins	One carbon pool by folate	194459	207136	142584	176276	154346	229135	171981	152129	209061	159192
Metabolism Of Cofactors and Vitamins	Thiamine metabolism	180855	199887	124195	177735	149796	217589	159880	125625	196590	134916
Metabolism Of Cofactors and Vitamins	Riboflavin metabolism	74548	79746	53590	78435	68903	100496	76694	59836	92424	64017
Metabolism Of Cofactors and Vitamins	Vitamin B6 metabolism	52495	56262	35059	38188	31021	61342	44320	41481	55370	42903
Metabolism Of Cofactors and Vitamins	Nicotinate and nicotinamide metabolism	135947	146702	94739	127794	109120	175440	130219	94896	159506	100454
Metabolism Of Cofactors and Vitamins	Pantothenate and CoA biosynthesis	222106	245862	149107	193352	163472	279940	193130	164927	248682	174962
Metabolism Of Cofactors and Vitamins	Biotin metabolism	47604	54523	27874	39720	32138	80932	49963	29384	70094	31458
Metabolism Of Cofactors and Vitamins	Lipoic acid metabolism	3681	3194	3419	4539	4265	5486	4005	2115	4978	1656
Metabolism Of Cofactors and Vitamins	Folate biosynthesis	119614	135043	78594	117665	103092	161624	114032	80922	145406	85965
Metabolism Of Cofactors and Vitamins	Retinol metabolism	4286	5337	4970	7527	10602	1844	2043	1677	1764	1418
Metabolism Of Cofactors and Vitamins	Porphyrin and chlorophyll metabolism	348574	398390	243096	344407	310509	443290	282481	280770	383892	306087
Metabolism Of Other Amino Acids	beta-Alanine metabolism	59860	66333	36141	55394	43912	87552	54764	39428	76173	42452
Metabolism Of Other Amino Acids	Taurine and hypotaurine metabolism	35705	38578	26403	35788	30575	42469	35472	23748	40433	24997
Metabolism Of Other Amino Acids	Phosphonate and phosphinate metabolism	14527	16344	15582	9175	14298	15918	10599	15515	13792	16554
Metabolism Of Other Amino Acids	Selenocompound metabolism	127109	140324	85475	119668	100711	150053	111963	83568	136786	89627
Metabolism Of Other Amino Acids	Cyanoamino acid metabolism	97820	108511	58148	80964	64102	115073	81721	65006	103555	68049
Metabolism Of Other Amino Acids	D-Glutamine and D-glutamate metabolism	49301	53406	39085	51817	47069	60162	49761	40002	57096	41886
Metabolism Of Other Amino Acids	D-Arginine and D-ornithine metabolism	129	128	69	37	31	48	37	65	33	110
Metabolism Of Other Amino Acids	D-Alanine metabolism	38786	42975	29533	40587	37555	43132	38785	29751	42072	30945
Metabolism Of Other Amino Acids	Glutathione metabolism	53644	58730	41664	60357	56884	61631	50349	40285	57528	42753
Metabolism Of Terpenoids and Polyketides	Tetracycline biosynthesis	63068	75593	41170	57011	54223	78111	51896	47987	68469	52872
Metabolism Of Terpenoids and Polyketides	Geraniol degradation	5132	4377	1956	2687	1472	5239	2941	2379	4065	1649
Metabolism Of Terpenoids and Polyketides	Polyketide sugar unit biosynthesis	75048	85671	37028	65805	54294	115839	83090	48726	105501	52246
Metabolism Of Terpenoids and Polyketides	Terpenoid backbone biosynthesis	197859	213540	146771	192461	168993	228893	182645	150708	213135	158429
Metabolism Of Terpenoids and Polyketides	Limonene and pinene degradation	21944	23813	16035	14458	16457	23937	18137	19410	21628	19797
Metabolism Of Terpenoids and Polyketides	Carotenoid biosynthesis	576	395	290	797	512	128	301	534	195	329
Metabolism Of Terpenoids and Polyketides	Zeatin biosynthesis	15627	16886	12619	14841	12977	18593	14659	11415	17310	11844
Metabolism Of Terpenoids and Polyketides	Biosynthesis of ansamycins	35124	37249	23599	27025	22992	34630	22665	26220	29608	27682
Metabolism Of Terpenoids and Polyketides	Biosynthesis of siderophore group nonribosomal peptides	2037	2718	1686	2109	2893	1443	828	505	1029	369
Metabolism Of Terpenoids and Polyketides	Biosynthesis of vancomycin group antibiotics	20334	22666	11151	18266	15420	30626	22163	13433	27970	13982

[truncated: 1 more sheets: KEGG-Level3-day 28]
